# Supplementary material for: Protocol for the Psychosis Immune Mechanism Stratified Medicine (PIMS) trial: a randomised double-blind placebo-controlled trial of single-dose tocilizumab in patients with psychosis
Source: PubMed Central journal article supplement (PMC10040013; doi:10.1136/bmjopen-2022-067944), 2023-03-24
Supplement: bmjopen-2022-067944.draft_revisions.pdf [file bmjopen-2022-067944.draft_revisions.pdf]

# BMJ Open

BMJ Open is committed to open peer review. As part of this commitment we make the peer review history of every article we publish publicly available.

When an article is published we post the peer reviewers' comments and the authors' responses online. We also post the versions of the paper that were used during peer review. These are the versions that the peer review comments apply to.

The versions of the paper that follow are the versions that were submitted during the peer review process. They are not the versions of record or the final published versions. They should not be cited or distributed as the published version of this manuscript.

BMJ Open is an open access journal and the full, final, typeset and author-corrected version of record of the manuscript is available on our site with no access controls, subscription charges or pay-per-view fees (<http://bmjopen.bmj.com>).

If you have any questions on BMJ Open's open peer review process please email [info.bmjopen@bmj.com](mailto:info.bmjopen@bmj.com)

# BMJ Open

## Protocol for the Psychosis Immune Mechanism Stratified Medicine (PIMS) trial: A randomised double-blind placebo-controlled trial of single dose tocilizumab in patients with psychosis

|                               |                                                                                                                                                                                                                                                                                                                                                                                                                                                                                                                                                                                                                                                                                                                                                                                                                                                                                                                                                                                                                                                                                                                                                                                                                                                                                                                                                                                                                                                                                                                                                                                                                                                                                                                                                                                              |
|-------------------------------|----------------------------------------------------------------------------------------------------------------------------------------------------------------------------------------------------------------------------------------------------------------------------------------------------------------------------------------------------------------------------------------------------------------------------------------------------------------------------------------------------------------------------------------------------------------------------------------------------------------------------------------------------------------------------------------------------------------------------------------------------------------------------------------------------------------------------------------------------------------------------------------------------------------------------------------------------------------------------------------------------------------------------------------------------------------------------------------------------------------------------------------------------------------------------------------------------------------------------------------------------------------------------------------------------------------------------------------------------------------------------------------------------------------------------------------------------------------------------------------------------------------------------------------------------------------------------------------------------------------------------------------------------------------------------------------------------------------------------------------------------------------------------------------------|
| Journal:                      | <i>BMJ Open</i>                                                                                                                                                                                                                                                                                                                                                                                                                                                                                                                                                                                                                                                                                                                                                                                                                                                                                                                                                                                                                                                                                                                                                                                                                                                                                                                                                                                                                                                                                                                                                                                                                                                                                                                                                                              |
| Manuscript ID                 | bmjopen-2022-067944                                                                                                                                                                                                                                                                                                                                                                                                                                                                                                                                                                                                                                                                                                                                                                                                                                                                                                                                                                                                                                                                                                                                                                                                                                                                                                                                                                                                                                                                                                                                                                                                                                                                                                                                                                          |
| Article Type:                 | Protocol                                                                                                                                                                                                                                                                                                                                                                                                                                                                                                                                                                                                                                                                                                                                                                                                                                                                                                                                                                                                                                                                                                                                                                                                                                                                                                                                                                                                                                                                                                                                                                                                                                                                                                                                                                                     |
| Date Submitted by the Author: | 02-Sep-2022                                                                                                                                                                                                                                                                                                                                                                                                                                                                                                                                                                                                                                                                                                                                                                                                                                                                                                                                                                                                                                                                                                                                                                                                                                                                                                                                                                                                                                                                                                                                                                                                                                                                                                                                                                                  |
| Complete List of Authors:     | <p>Foley, Éimear; University of Bristol, MRC Integrative Epidemiology Unit, Population Health Sciences; Bristol Medical School, Centre for Academic Mental Health, Population Health Sciences</p> <p>Griffiths, Sian Lowri; University of Birmingham, Institute for Mental Health and Centre for Human Brain Health</p> <p>Murray, Alexander; University of Birmingham, Institute for Mental Health and Centre for Human Brain Health</p> <p>Rogers, Jack; University of Birmingham, Institute for Mental Health and Centre for Human Brain Health</p> <p>Corsi-Zuelli, Fabiana; University of Birmingham, Institute for Mental Health and Centre for Human Brain Health; University of Sao Paulo, Department of Neuroscience and Behaviour</p> <p>Hickinbotham, Hannah; University of Cambridge, Department of Psychiatry</p> <p>Kaser, Muzaffer; University of Cambridge, Psychiatry; Cambridgeshire and Peterborough NHS Foundation Trust</p> <p>Murray, Graham K.; University of Cambridge, Psychiatry; Cambridgeshire and Peterborough NHS Foundation Trust</p> <p>Deakin, Bill; The University of Manchester, Faculty of Medicine, Biology and Health</p> <p>Jadon, Deepak; University of Cambridge, Medicine</p> <p>Suckling, John; University of Cambridge, Psychiatry; Cambridgeshire and Peterborough NHS Foundation Trust</p> <p>Barnes, Nicholas ; University of Birmingham, Institute of Clinical Sciences</p> <p>Upthegrove, Rachel; University of Birmingham, Institute for Mental Health and Centre for Human Brain Health; Early Intervention Service, Birmingham Women's and Children's NHS Foundation Trust</p> <p>Khandaker, Golam M.; University of Bristol, MRC Integrative Epidemiology Unit, Population Health Sciences; NIHR Bristol Biomedical Research Centre</p> |
| Keywords:                     | Schizophrenia & psychotic disorders < PSYCHIATRY, IMMUNOLOGY, Clinical trials < THERAPEUTICS, Magnetic resonance imaging < RADIOLOGY & IMAGING                                                                                                                                                                                                                                                                                                                                                                                                                                                                                                                                                                                                                                                                                                                                                                                                                                                                                                                                                                                                                                                                                                                                                                                                                                                                                                                                                                                                                                                                                                                                                                                                                                               |
|                               |                                                                                                                                                                                                                                                                                                                                                                                                                                                                                                                                                                                                                                                                                                                                                                                                                                                                                                                                                                                                                                                                                                                                                                                                                                                                                                                                                                                                                                                                                                                                                                                                                                                                                                                                                                                              |

1  
2  
3  
4  
5  
6  
7  
8  
9  
10  
11  
12  
13  
14  
15  
16  
17  
18  
19  
20  
21  
22  
23  
24  
25  
26  
27  
28  
29  
30  
31  
32  
33  
34  
35  
36  
37  
38  
39  
40  
41  
42  
43  
44  
45  
46  
47  
48  
49  
50  
51  
52  
53  
54  
55  
56  
57  
58  
59  
60

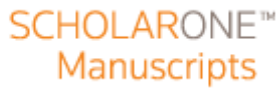

1  
2  
3 1 **Protocol for the Psychosis Immune Mechanism Stratified Medicine (PIMS) trial: A**  
4  
5 2 **randomised double-blind placebo-controlled trial of single dose tocilizumab in patients**  
6  
7  
8 3 **with psychosis**  
9  
10 4

11  
12 5 Éimear M. Foley<sup>a,b</sup>; Sian Lowri Griffiths<sup>c</sup>; Alexander Murray<sup>c</sup>; Jack Rogers<sup>c</sup>; Fabiana Corsi-  
13  
14 6 Zuelli<sup>c,d,e</sup>; Hannah Hickinbotham<sup>f</sup>; Muzaffer Kaser<sup>f,g</sup>; Graham K. Murray<sup>f,g</sup>; Bill Deakin<sup>h</sup>;  
15  
16  
17 7 Deepak Jadon<sup>i</sup>; John Suckling<sup>f,g</sup>; Nicholas M. Barnes<sup>e</sup>; Rachel Uptegrove<sup>c,j,†</sup>; and Golam M.  
18  
19 8 Khandaker<sup>a,b,k,l,†,\*</sup>; for the PIMS Collaboration  
20  
21  
22 9

23  
24 10 <sup>a</sup> MRC Integrative Epidemiology Unit, Population Health Sciences, Bristol Medical School,  
25  
26 11 University of Bristol, Bristol, United Kingdom

27  
28 12 <sup>b</sup> Centre for Academic Mental Health, Population Health Sciences, Bristol Medical School,  
29  
30 13 University of Bristol, Bristol, United Kingdom

31  
32  
33 14 <sup>c</sup> Institute for Mental Health and Centre for Human Brain Health, University of Birmingham,  
34  
35 15 Birmingham, United Kingdom

36  
37 16 <sup>d</sup> Department of Neuroscience and Behaviour, Division of Psychiatry, Ribeirão Preto Medical  
38  
39 17 School, University of São Paulo, São Paulo, Brazil

40  
41  
42 18 <sup>e</sup> Institute of Clinical Sciences, College of Medical and Dental Sciences, University of  
43  
44 19 Birmingham, United Kingdom

45  
46  
47 20 <sup>f</sup> Department of Psychiatry, University of Cambridge, United Kingdom

48  
49 21 <sup>g</sup> Cambridgeshire and Peterborough NHS Foundation Trust, United Kingdom

50  
51 22 <sup>h</sup> Faculty of Biology, Medicine and Health, Division of Neuroscience and Experimental  
52  
53 23 Psychology, School of Biological Sciences, University of Manchester, Manchester Academic  
54  
55 24 Health Science Centre, Manchester, United Kingdom

56  
57  
58 25 <sup>i</sup> Department of Medicine, University of Cambridge, United Kingdom  
59  
60

1  
2  
3 26 <sup>j</sup> Early Intervention Service, Birmingham Women's and Children's NHS Foundation Trust  
4

5 27 <sup>k</sup> NIHR Bristol Biomedical Research Centre, Bristol, United Kingdom  
6

7 28 <sup>l</sup> Avon and Wiltshire Mental Health Partnership NHS Trust, Bristol, United Kingdom  
8  
9

10 29  
11

12 30 <sup>†</sup> Joint senior authors  
13  
14

15 31  
16

17 32 \* **Corresponding author and address:** Prof Golam M. Khandaker, MRC Integrative  
18

19 33 Epidemiology Unit, Oakfield House, Oakfield Grove, Clifton, Bristol, BS8 2BN, UK  
20

21 34 Email: [golam.khandaker@bristol.ac.uk](mailto:golam.khandaker@bristol.ac.uk)  
22  
23  
24  
25  
26  
27  
28  
29  
30  
31  
32  
33  
34  
35  
36  
37  
38  
39  
40  
41  
42  
43  
44  
45  
46  
47  
48  
49  
50  
51  
52  
53  
54  
55  
56  
57  
58  
59  
60

## 35 ABSTRACT

36 **Introduction:** Evidence suggests a potentially causal role of interleukin 6 (IL-6), a  
37 pleiotropic cytokine that generally promotes inflammation, in the pathogenesis of psychosis,  
38 but no interventional studies elucidating potential mechanisms in patients with psychosis,  
39 stratified using inflammatory markers, have been conducted. Tocilizumab is a humanised  
40 monoclonal antibody targeting the IL-6 receptor to inhibit IL-6 signalling licensed in the UK  
41 for treatment of rheumatoid arthritis. The primary objective of this study is to test whether IL-  
42 6 contributes to the pathogenesis of psychosis, and to examine potential mechanisms by  
43 which IL-6 affects psychotic symptoms. A secondary objective is to examine characteristics  
44 of inflammation-associated psychosis.

45 **Methods and analysis:** A proof-of-concept study employing a randomised, parallel-group,  
46 double-blind, placebo-controlled design testing the effect of IL-6 inhibition on anhedonia in  
47 patients with psychosis. Approximately 60 participants with diagnosis of schizophrenia and  
48 related psychotic disorders (ICD-10 codes F20, F22, F25, F28, F29) with evidence of low-  
49 grade inflammation (IL-6  $\geq 0.7$ pg/ml) will receive either one intravenous infusion of  
50 tocilizumab (4.0mg/kg; max 800mg) or normal saline. Psychiatric measures and blood  
51 samples will be collected at baseline, and 7-, 14-, and 28-days post-infusion. Cognitive and  
52 neuroimaging data will be collected at baseline and 14 days post-infusion. In addition,  
53 approximately 30 patients with psychosis without evidence of inflammation (IL-6  $< 0.7$ pg/ml)  
54 and 30 matched healthy controls will be recruited to complete identical baseline assessments  
55 to allow for comparison of the characteristic features of inflammation-associated psychosis.

56 **Ethics and dissemination:** The study is sponsored by the University of Bristol and has been  
57 approved by the Cambridge East Research Ethics Committee (reference: 22/EE/0010; IRAS  
58 project ID: 301682). Study findings will be published in peer-review journals. Findings will  
59 be also disseminated by scientific presentation and by other means.

1  
2  
3  
4  
5  
6  
7  
8  
9  
10  
11  
12  
13  
14  
15  
16  
17  
18  
19  
20  
21  
22  
23  
24  
25  
26  
27  
28  
29  
30  
31  
32  
33  
34  
35  
36  
37  
38  
39  
40  
41  
42  
43  
44  
45  
46  
47  
48  
49  
50  
51  
52  
53  
54  
55  
56  
57  
58  
59  
60

60 **Trial registration number:** ISRCTN 23256704

61

62 **KEYWORDS:** Psychotic Disorders; Negative Symptoms; Interleukin 6; Immunotherapy;  
63 Tocilizumab; Clinical Trial.

For peer review only

1  
2  
3 64 ARTICLE SUMMARY  
4  
5

6 65 **Strengths and limitations of this study**  
7

- 8 66 • Adopting a randomised controlled trial (RCT) design and patient selection based on  
9  
10 67 elevated level of IL-6 (in addition to other criteria) will help examine the causal role  
11  
12 68 of IL-6, and the therapeutic potential of targeting IL-6 pathway, in psychosis.  
13  
14  
15 69 • The use of target specific intervention (anti-IL6R monoclonal antibody tocilizumab)  
16  
17 70 will help assess the clinical relevance of IL-6 and related up- and downstream  
18  
19 71 inflammatory cytokines in psychosis.  
20  
21  
22 72 • The use of neuroimaging, cognitive tests, and extensive peripheral blood biomarker  
23  
24 73 exploration before and after tocilizumab treatment to assess potential mechanisms of  
25  
26 74 effect.  
27  
28  
29 75 • One dose of tocilizumab is unlikely to be sufficient to test the efficacy of this drug as  
30  
31 76 potential treatment for psychosis.  
32  
33  
34 77 • Tocilizumab inhibits both anti-inflammatory (classic) and pro-inflammatory (trans)  
35  
36 78 pathways of IL-6 that may have complementary or differential effects relevant to  
37  
38 79 potential therapeutic effects.  
39  
40  
41  
42  
43  
44  
45  
46  
47  
48  
49  
50  
51  
52  
53  
54  
55  
56  
57  
58  
59  
60



1  
2  
3 81 **Word count:** 3,956  
4

5 82 INTRODUCTION  
6

7  
8 83 **Scientific background and study rationale**  
9

10 84 The neuroimmune hypothesis of schizophrenia proposes that mild peripheral immune  
11  
12 85 activation gives rise to an inflammatory response in the brain and neurobiological changes  
13  
14 86 associated with psychotic illness [1–4]. Meta-analytic evidence is clear that circulating  
15  
16 87 concentrations of interleukin 6 (IL-6) and other inflammatory proteins, such as C-reactive  
17  
18 88 protein (CRP), are increased in patients with psychosis, including treatment naïve first  
19  
20 89 episode psychosis (FEP) [5], compared with controls [6–9]. Prospective cohort studies show  
21  
22 90 that these indices of mild immune activation precede the onset of symptoms [10,11].  
23  
24  
25  
26 91 Furthermore, genetic variants known to increase IL-6 concentrations are associated with  
27  
28 92 genetic risk of schizophrenia [12,13]. These Mendelian randomization studies eliminate the  
29  
30 93 possibility that raised IL-6 concentrations are a consequence of environmental exposures  
31  
32 94 associated with schizophrenia, such as obesity and smoking and instead suggest that IL-6 has  
33  
34 95 a causal role in psychosis. Extending this approach using the UK Biobank population, we  
35  
36 96 found that genetically-predicted levels of IL-6 were associated with reduced grey matter  
37  
38 97 primarily in the middle temporal gyrus, a region whose gene expression profile is enriched  
39  
40 98 for IL-6 pathway proteins and for neuropsychiatric disorder ontologies [14]. Moreover,  
41  
42 99 clinical studies report correlations between IL-6 levels and structural brain changes in  
43  
44  
45 100 individuals with schizophrenia [15], with reduced grey matter volume being exaggerated in  
46  
47 101 patients with psychosis and elevated inflammatory cytokines [16]. Though this causal  
48  
49  
50 102 evidence strongly implicates IL-6, only an intervention study in patients can test the causal  
51  
52  
53 103 hypothesis.  
54

55  
56 104 The neuroimmune hypothesis generally assumes that microglia, the brain's resident  
57  
58 105 immune cells, are activated and pathogenic in schizophrenia. This is supported by traditional  
59  
60

1  
2  
3 106 neuropathological studies and initial in-vivo PET imaging studies [17–19], possibly reflecting  
4  
5 107 impaired cellular control of inflammation or oxidative defence. Inflammatory damage may  
6  
7  
8 108 also account for evidence of oxidative stress from MRS glutathione studies [20]. However,  
9  
10 109 whether microglia are the direct target of IL-6 is unclear and it is not certain that IL-6 can  
11  
12 110 cross the blood-brain barrier and/or increase its permeability to circulating inflammatory  
13  
14 111 cells, cytokines, and chemokines [2,21]. Additionally, it is increasingly uncertain whether  
15  
16 112 microglial inflammation, as traditionally understood, occurs in schizophrenia [22,23]. Recent  
17  
18 113 meta-analyses of PET radioligand binding studies report decreased rather than increased  
19  
20 114 radioligand binding to activated microglia [24,25]. This may account for the unexpected lack  
21  
22 115 of therapeutic benefit of the anti-microglial antibiotic, minocycline, in recent large clinical  
23  
24 116 trials [26,27]. Furthermore, large transcriptomic studies in post-mortem brains report no  
25  
26 117 change or reduction in microglial gene expression but increases in astrocytic expression  
27  
28 118 [23,28–32]. It is increasingly understood that both peripheral immune responses and brain  
29  
30 119 glial function are regulated by specialised T cells (Tregs), a subset of which reside in brain  
31  
32 120 parenchyma [33,34]. A novel proposal is that Treg hypofunction accounts for mild peripheral  
33  
34 121 immune disinhibition and dysregulated astroglial-microglial interaction, such that microglia  
35  
36 122 are driven into a developmental, synapse-pruning phenotype while astroglia disrupt  
37  
38 123 neurotransmitter function [33,34]. Importantly, there are bidirectional interactions between  
39  
40 124 IL-6 and Treg function [34]. Crucially, we will measure IL-6 in addition to cellular and  
41  
42 125 molecular markers of immune function and investigate how they correlate with central  
43  
44 126 markers and clinical state.  
45  
46  
47  
48  
49

50  
51 127       Previous attempts testing the inflammatory hypothesis in therapeutic clinical trials  
52  
53 128 have been attempted. However, little evidence of overall efficacy has been found [35]. These  
54  
55 129 trials have generally tested broad spectrum agents, such as non-steroidal anti-inflammatory  
56  
57 130 drugs, with no attempt to stratify patients according to evidence of inflammation. A trial  
58  
59  
60

1  
2  
3 131 using tocilizumab, a humanised monoclonal antibody (mAb) against the IL-6 receptor  
4  
5 132 currently licensed in the UK for treatment of rheumatoid arthritis (RA) and severe  
6  
7 133 coronavirus disease, reported no improvements in any clinical measure in a small sample of  
8  
9 134 36 patients with established schizophrenia [36]. However, as mentioned previously, no  
10  
11 135 stratification by inflammatory markers or any mechanistic immune measures was applied.  
12  
13 136 Low-grade inflammation is associated with poor response to antipsychotic drugs [37], but  
14  
15 137 immunotherapy is unlikely to be relevant for all patients with psychosis. Meta-analysis  
16  
17 138 suggests that evidence of immune activation, defined by elevated CRP levels, is present in a  
18  
19 139 quarter to one third of patients with schizophrenia [38]. A randomised controlled trial of  
20  
21 140 infliximab, an anti-tumour necrosis factor alpha (TNF- $\alpha$ ) mAb, reported that antidepressant  
22  
23 141 response was associated with higher CRP levels at baseline [39], suggesting that patients with  
24  
25 142 evidence of immune activation may be better candidates for immunotherapy trials. As far as  
26  
27 143 we are aware, no previous clinical trial has selected patients with schizophrenia based on  
28  
29 144 evidence of immune activation.  
30  
31  
32  
33  
34

35 145 Selection of patients with particular symptom profiles and/or stage of illness may also  
36  
37 146 be a useful strategy that needs to be employed in immunotherapy trials for schizophrenia. A  
38  
39 147 wide variety of symptoms occur in schizophrenia such as hallucinations, delusions,  
40  
41 148 anhedonia, cognitive dysfunction, and affective symptoms and presentation of these  
42  
43 149 symptoms differ from one individual to another. Some symptoms may be more related to  
44  
45 150 inflammation than others. For instance, a recent study from the ALSPAC birth cohort  
46  
47 151 reported that out of 20 positive and negative symptoms, CRP is particularly associated with  
48  
49 152 anhedonia and auditory hallucinations [40]. Anhedonia and amotivation are strongly  
50  
51 153 associated with poor functional outcomes in depression and schizophrenia, and present a  
52  
53 154 formidable barrier to returning to work or building relationships [41,42]. Patients with  
54  
55 155 psychotic disorders also present with cognitive deficits in a range of domains [43]. Available  
56  
57  
58  
59  
60

1  
2  
3 156 antipsychotic medications have a limited effects on poor cognitive functioning in psychosis  
4  
5 157 [44]. Illness stage may also be of relevance. Meta-analytic data has revealed no differences in  
6  
7 158 IL-6 levels between stable, medicated patients with schizophrenia and controls, although  
8  
9 159 compared with controls, IL-6 levels were similarly elevated in patients with FEP and those  
10  
11 160 with acute relapse [7]. A separate meta-analysis found evidence of elevated blood cytokine  
12  
13 161 levels in acutely and chronically ill patients with schizophrenia [6]. Focusing on particular  
14  
15 162 inflammation-related symptoms and/or illness stage may increase the chance of success for  
16  
17 163 immunotherapy trials.  
18  
19  
20  
21  
22  
23

### 24 165 **Proposed study**

25  
26 166 The proposed two-year study is a UK multi-site (Bristol, Birmingham, and Cambridge)  
27  
28 167 proof-of-concept, randomised, parallel-group, double-blind, placebo-controlled trial.  
29  
30  
31  
32

### 33 169 *Study aims and hypotheses*

34  
35 170 The primary aim of this trial is to examine potential mechanisms by which IL-6 affects  
36  
37 171 anhedonia, psychotic symptoms, and cognition. Our primary hypothesis is that inhibition of  
38  
39 172 IL-6 signalling with a single intravenous infusion of anti-IL6R monoclonal antibody,  
40  
41 173 tocilizumab, in individuals with psychosis and elevated IL-6 at baseline will attenuate  
42  
43 174 symptoms of anhedonia and amotivation in patients with psychosis, relative to placebo. This  
44  
45 175 will provide further evidence for a potential causal role of inflammation in psychosis. Our  
46  
47 176 secondary hypothesis is that reduction in peripheral inflammation after tocilizumab infusion  
48  
49 177 in patients with psychosis and evidence of inflammation will be associated with central  
50  
51 178 measures of oxidative stress and relevant resting state brain function.  
52  
53  
54

55  
56 179 We will also conduct deep immunophenotyping of peripheral blood mononuclear cell  
57  
58 180 subsets (CD4<sup>+</sup>, CD8<sup>+</sup>, Tregs, natural killer and natural killer-T cells, monocytes, and B cells)  
59  
60

1  
2  
3 181 to characterise their absolute number, frequency, and function. Our primary mechanistic  
4  
5 182 outcome is the level of IL-6/STAT3 signalling inhibition within both innate and adaptive  
6  
7  
8 183 immune cells using multi-colour flow cytometry with an established optimised pSTAT3  
9  
10 184 phosflow assay. This will help identify the potential cellular impact of peripheral  
11  
12 185 inflammation in psychosis, which is largely unknown. Functional assessment of IL-6/STAT3  
13  
14 186 signalling in immune cell subsets and their response to exogenous IL-6 stimulation will  
15  
16 187 inform abnormal immune response in psychosis and allow measurement of response to  
17  
18 188 tocilizumab at the cellular level.

19  
20  
21 189 A secondary objective is to carry out an observational study to examine clinical and  
22  
23 190 biomarker differences and similarities between patients with psychotic disorder with and  
24  
25 191 without evidence of inflammation and healthy controls (HCs). We hypothesise that  
26  
27 192 individuals with psychotic disorder and evidence of inflammation, compared to those without  
28  
29 193 evidence of inflammation and HCs, will have increased symptoms of anhedonia and  
30  
31 194 amotivation, poorer cognitive functioning, and cellular and brain-based measures of immune  
32  
33 195 dysfunction.

34  
35  
36  
37 196

## 38 39 40 41 197 METHODS

42  
43 198 This protocol has been prepared in accordance with the Standard Protocol Items:  
44  
45 199 Recommendations for Interventional Trials (SPIRIT) 2013 statement [45]. Please see  
46  
47 200 supplementary eTable 1 for the SPIRIT checklist.

48  
49  
50 201

### 51 52 202 **Patient and public involvement**

53  
54 203 The study protocol was prepared in collaboration with individuals with lived experience of  
55  
56 204 mental illness who contributed to the development of participant information sheet, consent  
57  
58 205 forms, and data collection procedures.

## 206 **Study design and sample**

207 See Figure 1 for an overview of study design. Individuals residing in Bristol, Birmingham, or  
208 Cambridge in the United Kingdom will be recruited. Approximately 60 participants with  
209 psychosis and evidence of inflammation (i.e., IL-6  $\geq 0.7$ pg/ml) will be randomised to receive  
210 either one intravenous infusion of tocilizumab (drug) or normal saline (placebo). For the  
211 secondary, observational study, we will compare baseline characteristics of the intervention  
212 cohort with approximately 30 participants with psychosis without evidence of inflammation  
213 (i.e., IL-6  $< 0.7$ pg/ml), and approximately 30 HCs. Participants without evidence of  
214 inflammation and controls will not be randomised as they will not receive any intervention.  
215 Neuroimaging will only be undertaken by those without MRI contraindications who have  
216 given specific informed consent for MRI. Participants not eligible or not consenting for MRI  
217 will take part in all other aspects of the study.

## 219 **Intervention**

220 Single intravenous infusion of tocilizumab (4.0mg/kg; max 800mg in total) or normal saline  
221 given to participants with psychosis and evidence of inflammation. Tocilizumab blocks both  
222 IL-6 classic and trans-signalling – the latter being responsible for most of the inflammatory  
223 effects of IL-6 – providing broad inhibition of IL-6 signalling and a strong test of a casual  
224 role for IL-6 in psychosis [46]. Tocilizumab is the first-in-class, humanized monoclonal  
225 antibody against the IL-6R, commercially available and licensed in the UK for treatment of  
226 RA. Approved dosage of tocilizumab for treatment of RA is 2, 4, or 8mg/kg; max 800mg in  
227 total. In RA, a single tocilizumab infusion has shown to improve clinical and laboratory  
228 measures within 48 hours, with most noticeable results in one-to-two weeks [47,48]. The  
229 follow-up schedule for our study is in keeping with this observation.

1  
2  
3 **230 Eligibility criteria**  
4

5 231 We will recruit participants aged 18-40 years. Patient participants must meet International  
6  
7 232 Classification of Diseases 10<sup>th</sup> Revision (ICD-10) criteria for a diagnosis of schizophrenia  
8  
9 233 and related psychoses (ICD-10 code F20, F22, F25, F28, F29) at the time of eligibility  
10  
11 234 assessment, be within three years of first diagnosis of psychotic disorder, be on a stable  
12  
13 235 treatment regime with no recent (within two weeks) initiation, cessation, or change in class of  
14  
15 236 antipsychotic medication, and have a Positive and Negative Syndrome Scale (PANSS) item  
16  
17 237 score  $\geq 3$  on P1 (delusions), P2 (conceptual disorganisation), P3 (hallucinatory behaviour), or  
18  
19 238 P6 (suspiciousness/persecution). Additionally, patients recruited to the interventional arm  
20  
21 239 will be required to have serum IL-6 levels  $\geq 0.7$ pg/ml and a Temporal Experience of Pleasure  
22  
23 240 Scale (TEPS) anticipatory pleasure score  $\leq 41$  (based on item numbers 1, 3, 7, 11, 12, 14, 15,  
24  
25 241 16, 17, and 8) and consummatory pleasure score  $\leq 36$  (based on item numbers 2, 4, 5, 6, 8, 9,  
26  
27 242 10, and 13). Finally, COVID-19 anti-body titre test will be used to determine adequate levels  
28  
29 243 of immune response via the following cut-offs (for poor response): 400IU Roche/700IU  
30  
31 244 Abbot assay.  
32  
33  
34  
35  
36

37 245 HCs will have no current or lifetime history of psychiatric diagnosis, as determined by  
38  
39 246 the Mini-International Neuropsychiatric Interview (MINI). See Table 1 for complete  
40  
41 247 inclusion and exclusion criteria. HCs will be matched to patient participants at the group level  
42  
43 248 by age and sex.  
44  
45  
46  
47  
48  
49  
50  
51  
52  
53  
54  
55  
56  
57  
58  
59  
60



251 **Table 1. PIMS Trial inclusion and exclusion criteria.**

| Group            | Inclusion criteria                                                                                                                                                                                                                                                                | Exclusion criteria                                                                                                                                                                                                                                                                                                                                                                                                                                                                                                                                                                                                                                                                                                                                                                                                                                                                                                                                                                                                                                                                                                                                                                                                                                                                                                                                                                                                                                                                                                                                                                                                                                                                                                                                                                                                                                                                                                                              |
|------------------|-----------------------------------------------------------------------------------------------------------------------------------------------------------------------------------------------------------------------------------------------------------------------------------|-------------------------------------------------------------------------------------------------------------------------------------------------------------------------------------------------------------------------------------------------------------------------------------------------------------------------------------------------------------------------------------------------------------------------------------------------------------------------------------------------------------------------------------------------------------------------------------------------------------------------------------------------------------------------------------------------------------------------------------------------------------------------------------------------------------------------------------------------------------------------------------------------------------------------------------------------------------------------------------------------------------------------------------------------------------------------------------------------------------------------------------------------------------------------------------------------------------------------------------------------------------------------------------------------------------------------------------------------------------------------------------------------------------------------------------------------------------------------------------------------------------------------------------------------------------------------------------------------------------------------------------------------------------------------------------------------------------------------------------------------------------------------------------------------------------------------------------------------------------------------------------------------------------------------------------------------|
| All participants | <ul style="list-style-type: none"> <li>- Provide informed consent.</li> <li>- Understand written and spoken English.</li> <li>- Able and willing to consent to blood sampling.</li> <li>- Willing to abstain from strenuous exercise for 72 hours prior to assessment.</li> </ul> | <ul style="list-style-type: none"> <li>- Pregnancy (confirmed by urine pregnancy test) or breast feeding.</li> <li>- Body mass index &gt;35.</li> <li>- Current or lifetime diagnosis of antisocial personality disorder, autism or other neurodevelopmental disorder, major traumatic brain injury.</li> <li>- Currently active diagnosed eating disorder likely to compromise ability to take part.</li> <li>- History of alcohol or substance use disorder (abuse/dependence) within six months prior to eligibility assessment (nicotine and caffeine dependence are not exclusionary).</li> <li>- Current use of medication likely to compromise interpretation of immunological data.</li> <li>- Known active current or history of recurrent bacterial, viral, fungal, mycobacterial, or other opportunistic infections.</li> <li>- Current infection with VZV, TB, Hepatitis B, Hepatitis C, or HIV confirmed by blood test. Chest X-ray will also be performed to assess for TB.</li> <li>- Any major episode of infection requiring hospitalisation or treatment with IV antibiotics within 4 weeks of eligibility assessment.</li> <li>- Unstable cardiac, pulmonary, renal, hepatic, endocrine, hematologic, or active infectious disease, including current or prior malignancy.</li> <li>- Diverticulitis, inflammatory bowel disease, or uncontrolled gastric/duodenal ulcer.</li> <li>- Concomitant auto-immune or auto-inflammatory rheumatological disease.</li> <li>- Concomitant treatment with any biologic drugs.</li> <li>- Current and active ischemic heart disease.</li> <li>- Uncontrolled hypertension defined as systolic blood pressure &gt; 170 or diastolic blood pressure &gt; 110.</li> <li>- History of severe allergic or anaphylactic reactions to human, humanized or murine monoclonal antibodies.</li> <li>- No history of chicken pox infection or no history of varicella zoster immunity.</li> </ul> |



|                                                                       |                                                                                                                                                                                                                                                                                                                                                                                                                                                                                                                                                                                                                                                                                                                                                                                                                                                                                     |                             |
|-----------------------------------------------------------------------|-------------------------------------------------------------------------------------------------------------------------------------------------------------------------------------------------------------------------------------------------------------------------------------------------------------------------------------------------------------------------------------------------------------------------------------------------------------------------------------------------------------------------------------------------------------------------------------------------------------------------------------------------------------------------------------------------------------------------------------------------------------------------------------------------------------------------------------------------------------------------------------|-----------------------------|
| Additional criteria for neuroimaging (optional)                       | - Able and willing to consent to MRI scanning                                                                                                                                                                                                                                                                                                                                                                                                                                                                                                                                                                                                                                                                                                                                                                                                                                       | - Contraindications to MRI. |
| Additional criterion for healthy controls                             | - No current or lifetime psychiatric diagnosis.                                                                                                                                                                                                                                                                                                                                                                                                                                                                                                                                                                                                                                                                                                                                                                                                                                     |                             |
| Additional criteria for all individuals with psychosis                | <ul style="list-style-type: none"> <li>- Meet ICD-10 criteria for a diagnosis of schizophrenia and related psychoses (code F20, F22, F25, F28, F29) at the time of eligibility assessment, as determined by the Mini-International Neuropsychiatric Interview.</li> <li>- Be within three years of first diagnosis of psychotic disorder.</li> <li>- On stable treatment regime with no recent (within 2 weeks) initiation, cessation, or change in class of antipsychotic medication.</li> <li>- No indication or other reason for preclusion into research (e.g., significant risk of suicidal behaviour or risk to others) as determined by their clinical team.</li> <li>- Positive and Negative Syndrome Scale item score <math>\geq 3</math> on P1 (delusions), P2 (conceptual disorganisation), P3 (hallucinatory behaviour), OR P6 (suspiciousness/persecution).</li> </ul> |                             |
| Additional criteria for intervention group                            | <ul style="list-style-type: none"> <li>- Serum IL-6 level <math>\geq 0.7</math>pg/ml at eligibility and baseline assessment.</li> <li>- Temporal Experience of Pleasure Scale anticipatory pleasure score <math>\leq 41</math> (based upon item numbers 1, 3, 7, 11, 12, 14, 15, 16, 17, and 8) and consummatory pleasure score <math>\leq 36</math> (based upon item numbers 2, 4, 5, 6, 8, 9, 10, and 13).</li> <li>- Evidence of COVID-19 immunity required prior to infusion, confirmed before randomisation using evidence of vaccination and antibody titre test.</li> </ul>                                                                                                                                                                                                                                                                                                  |                             |
| Additional criterion for patients with psychosis without inflammation | - Serum IL-6 level $< 0.7$ pg/ml at eligibility and baseline assessment.                                                                                                                                                                                                                                                                                                                                                                                                                                                                                                                                                                                                                                                                                                                                                                                                            |                             |

254 **Study outcomes**

255 The primary outcome is anhedonia, defined as anticipatory and consummatory pleasure  
 256 scores, assessed by the TEPS [49] at approximately day 14 post-infusion. The primary  
 257 mechanistic outcome is the level of IL-6/STAT3 signalling inhibition post-tocilizumab  
 258 infusion in both innate and adaptive immune cells using multi-colour flow cytometry and an  
 259 established optimised pSTAT3 phosflow assay. We will also collect data on several  
 260 tertiary/exploratory measures including positive and negative symptoms of psychosis,  
 261 depressive symptoms, fatigue, quality of life and subjective wellbeing, cognitive function,  
 262 peripheral blood inflammatory markers, cortisol, cell expression, including DNA and RNA  
 263 sequencing, functionality, and neuroimaging measures, including functional resting state MRI  
 264 and MRS outcomes (Table 2).

265  
 266 **Table 2. PIMS trial study measures**

| Domain                     | Tool                                              | Source                       | Validated Tool | Time of assessment                |
|----------------------------|---------------------------------------------------|------------------------------|----------------|-----------------------------------|
| Sociodemographic/lifestyle | Screening questionnaire                           | Self-report                  |                | Screening                         |
|                            | Medical History Questionnaire                     | Self-report/General practice |                | Eligibility                       |
|                            | Substance Use Questionnaire                       | Self-report                  |                | Eligibility                       |
|                            | Physical Measurements Form                        | Self-report                  |                | Baseline                          |
|                            | Sociodemographic Questionnaire                    | Self-report                  |                | Baseline                          |
| Psychiatric                | The Temporal Experience of Pleasure Scale         | Self-report                  | ✓              | Eligibility, baseline, follow-ups |
|                            | The Positive and Negative Syndrome Scale          | Interviewer assessed         | ✓              | Eligibility, baseline, follow-ups |
|                            | The Mini-International Neuropsychiatric Interview | Interviewer assessed         | ✓              | Eligibility                       |
|                            | Psychiatric History Questionnaire                 | Self-report                  |                | Baseline                          |

|              |                                                                                                 |                      |   |                       |
|--------------|-------------------------------------------------------------------------------------------------|----------------------|---|-----------------------|
|              | The Scale for the Assessment of Negative Symptoms                                               | Self-report          | ✓ | Baseline, follow-ups  |
|              | The Calgary Depression Scale for Schizophrenia                                                  | Interviewer assessed | ✓ | Baseline, follow-ups  |
|              | Multi-dimensional Fatigue Inventory                                                             | Self-report          | ✓ | Baseline, follow-ups  |
|              | European Quality of Life-5 Dimensions Three-Level Version                                       | Self-report          | ✓ | Baseline, follow-ups  |
|              | Visual Analogue Scale for Subjective Wellbeing                                                  | Self-report          | ✓ | Baseline, follow-ups  |
| Cognitive    | National Adult Reading Test for estimated premorbid IQ                                          | Interviewer assessed | ✓ | Baseline, follow-up 2 |
|              | CANTAB Reaction Time test                                                                       | Computer task        | ✓ | Baseline, follow-up 2 |
|              | Symbol Coding Test                                                                              | Paper task           | ✓ | Baseline, follow-up 2 |
|              | CANTAB Rapid Visual Information Processing test                                                 | Computer task        | ✓ | Baseline, follow-up 2 |
|              | CANTAB Paired Associates Learning test                                                          | Computer task        | ✓ | Baseline, follow-up 2 |
|              | CANTAB One Touch Stockings of Cambridge test                                                    | Computer task        | ✓ | Baseline, follow-up 2 |
| Biologic     | Inflammatory markers, cardiometabolic markers,IDO activation, white cell phenotyping            | Laboratory tests     |   | Baseline, follow-ups  |
| Genetic      | Gene expression/genotyping                                                                      | Blood (RNA, DNA)     |   | Baseline, follow-ups  |
| Neuroimaging | MRI Screening Questionnaire                                                                     |                      |   | Baseline, follow-up 2 |
|              | Structural MRI, 1H-MRS measure of glutathione in the prefrontal cortex area, resting state fMRI |                      |   | Baseline, follow-up 2 |

## 268 **Sample size and statistical power**

269 We will recruit approximately 60 patients with psychosis. However, currently there are no  
270 trials of immunotherapies for anhedonia in schizophrenia making accurate power calculation  
271 difficult. This study is a proof-of-concept experiment designed to test whether inhibition of  
272 IL-6 signalling leads to changes in psychotic symptoms. It could also inform likely statistical  
273 power for future trials testing efficacy of the drug as a treatment of schizophrenia, which is  
274 not the intention of this study

275

## 276 **Randomisation and blinding**

277 An external agency independent of the study team will arrange random allocation to  
278 tocilizumab or normal saline group 1:1, ensuring two groups are comparable regarding  
279 anhedonia severity and sex. Randomisation will be stratified by site. Randomising agency  
280 will provide the randomisation code to the relevant hospital pharmacy who will dispense  
281 tocilizumab or normal saline according to the randomisation schedule. Dispensing  
282 pharmacies will keep a log of products dispensed. Infusions will be prepared and  
283 administered at clinical research facilities (CRFs). Infusion packs will be prepared by trained  
284 staff not part of the core study team, ensuring blinding of treatment allocation. Infusion packs  
285 containing drug or placebo will be visually indistinguishable from each other, ensuring that  
286 both participants and study team remain blind regarding treatment allocation.

287

## 288 **Statistical analysis**

289 For randomised participants, an intention-to-treat approach will be taken for data analysis by  
290 including all randomised participants in statistical analyses, regardless of the treatment they  
291 received (if any). We will compare outcome measures between treatment and placebo groups  
292 controlling for baseline scores. This mechanistic experiment will focus on overall pattern of

1  
2  
3 293 results and their effect sizes rather than *P*-values for individual tests of statistical significance.  
4

5 294 The secondary mechanistic and observational analysis will compare psychotic symptoms,  
6

7  
8 295 cognitive function, blood, neuroimaging, and other biomarkers between and across study  
9

10 296 groups using appropriate statistical tests.  
11

12 297  
13  
14

## 15 16 299 STUDY PROCEDURE

17  
18 300 An overview of study procedures is presented in Figure 1 and all study measures are detailed  
19

20 301 in Table 2. Recruitment will take place in Bristol, Birmingham, and Cambridge and  
21

22  
23 302 assessments at University and NHS research facilities.  
24

25 303  
26

### 27 304 **Participant identification**

28  
29 305 Potential participants with psychosis will be identified by NHS Psychosis Early Intervention  
30

31 306 (EI) teams. HCs will be recruited through advertisement methods in Birmingham and  
32

33 307 Cambridge. Potential participants will complete a screening questionnaire to confirm their  
34

35 308 eligibility to participate. If deemed eligible, participants will be invited to an appointment to  
36

37 309 complete a full eligibility assessment.  
38  
39  
40

41 310  
42

### 43 311 **Eligibility assessment**

44  
45 312 Assessments will be carried out to establish eligibility and to obtain informed consent.  
46

47  
48 313 Patients will complete the MINI to confirm ICD-10 diagnosis of schizophrenia and related  
49

50 314 psychoses, the PANSS to confirm the presence of positive symptoms of psychosis, and the  
51

52 315 TEPS to confirm eligibility based on anticipatory and consummatory pleasure sum scores. A  
53

54 316 blood sample will be collected from patients for serum IL-6 measurement. An MRI screening  
55

56 317 questionnaire will be administered to those willing to give informed consent for  
57

58 318 neuroimaging.  
59  
60

1  
2  
3 319 **Baseline assessment**  
4

5 320 All participants (60 inflamed psychosis, 30 non-inflamed psychosis, and 30 HCs) will attend  
6  
7 321 a baseline assessment comprising psychiatric measures, cognitive tasks, blood sampling, and  
8  
9 322 neuroimaging (optional). This will be the final study contact for patients without evidence of  
10  
11 323 inflammation and HCs. Patients with evidence of inflammation will undergo further tests to  
12  
13 324 establish safety/eligibility to receive tocilizumab, including a chest X-ray and blood tests to  
14  
15 325 exclude pregnancy and certain infections, such as TB, HIV, and COVID-19. Eligible  
16  
17 326 participants will be randomised and invited for infusion.  
18  
19  
20  
21  
22

23  
24 327

25 328 **Intervention**

26 329 Intravenous infusion of tocilizumab or normal saline will be given continuously over one  
27  
28 330 hour at CRFs in Bristol, Birmingham, and Cambridge by trained clinical staff under the  
29  
30 331 supervision of a designated study doctor. Participants will remain under clinical observation  
31  
32 332 for a further 1-hour period after the end of infusion.  
33  
34

35 333

36  
37 334 **Follow-up assessments**

38 335 Follow-up assessments will take place approximately 7-, 14-, and 28-days post-infusion, and  
39  
40 336 will collect similar data to the baseline assessment. Cognitive tasks and neuroimaging  
41  
42 337 (optional) will be administered only on day 14. Around 42 days post-infusion, participants  
43  
44 338 will be contacted by phone to provide a final debrief; at which point they will exit the study.  
45  
46  
47  
48

49 339

50  
51 340 **RISK MANAGEMENT**

52  
53 341 **Psychosis-related risks**

54 342 All patients will be under the care of a specialist NHS psychosis EI service. Participation will  
55  
56 343 not involve any treatment modifications or significant delays in receiving treatment. If a  
57  
58  
59  
60

1  
2  
3 344 patient becomes distressed during an assessment, or does not wish to continue for any reason,  
4  
5 345 the researcher will stop the assessment. Participants may withdraw at any time without giving  
6  
7 346 a reason. If there is any concern for the participant's safety, the research team will liaise with  
8  
9  
10 347 participant's GP and/or mental health team as needed.  
11

12 348

14 349 **Procedure-related risks**

16 350 *Venepuncture*

17  
18  
19 351 Blood taking is associated with mild discomfort and other side effects are rare. Efforts will be  
20  
21 352 made to minimise discomfort. Blood taking will be performed by a nurse, doctor, or research  
22  
23 353 team member trained in venepuncture.  
24

25 354

26 355 *Chest X-ray*

27  
28  
29 356 This study will use a typical effective radiation dose of 0.014 mSv; equivalent to 2.5 days of  
30  
31 357 average natural background radiation in the UK. The risk of developing cancer as a  
32  
33 358 consequence of participating in this study is 0.0001%. Only non-pregnant, adult participants  
34  
35 359 will be included.  
36  
37

38 360

39 361 *Neuroimaging*

40  
41  
42 362 Discomfort during MRI will be minimised by using mirrors to allow participants to view  
43  
44 363 outside of the machine, providing ear plugs and a panic button, and allowing participants to  
45  
46 364 communicate with the researcher and scan operator throughout. Mild transient vertigo may be  
47  
48 365 experienced when being moved into the MRI machine. Risk of dislodgement or malfunction  
49  
50 366 of medical implants or metallic foreign objects will be minimised by screening participants to  
51  
52 367 ensure no metal is present on or within the body.  
53  
54  
55

56 368

1  
2  
3 369 *IL-6 levels*  
4

5 370 Some participants will show evidence of inflammation in the blood (IL-6  $\geq 0.7$ pg/ml). This is  
6  
7 371 not necessarily a cause for concern. In people with FEP, ~50% have serum IL-6 levels  
8  
9 372  $> 0.7$ pg/ml. Reasons for this in the absence of an acute infection or chronic inflammatory  
10  
11 373 illness could include obesity, smoking, alcohol use, and lack of exercise, so knowledge of  
12  
13 374 'inflammation status' may prompt participants to adopt a healthier lifestyle. If serum IL-6  
14  
15 375 level is high (i.e., IL-6  $\geq 0.7$ pg/ml) along with elevated CRP ( $> 20$ mg/L) without any apparent  
16  
17 376 explanation, such as infection or chronic inflammatory illness, we will inform the  
18  
19 377 participant's GP and the participant will be excluded from the study.  
20  
21  
22  
23

24 378

25  
26 379 *Risk to research staff*  
27

28 380 Staff will follow local safety procedures when lone working. No other risks are anticipated.  
29  
30

31 381

32  
33 382 **Safety considerations for infusion and monitoring of adverse reaction**  
34

35 383 *Before infusion*  
36

37 384 Participants will be selected based on strict inclusion and exclusion criteria. Additionally, we  
38  
39 385 will carry out tests for TB, HIV, VZV antibody, and Hepatitis B and C because, though  
40  
41 386 unlikely after a single dose, tocilizumab could make these infections worse. Female  
42  
43 387 participants of childbearing age will be given a pregnancy test, which must be negative.  
44  
45 388 Participants who are sexually active will be asked to use at least one form of effective  
46  
47 389 contraception for six weeks post-infusion. Male participants will also be asked not to donate  
48  
49 390 sperm samples for six weeks post-infusion.  
50  
51  
52

53 391

54 392

55 393  
56  
57  
58  
59  
60



1  
2  
3 394 *During infusion*  
4

5 395 Infusions will be given under supervision of a designated study doctor. Participants will be  
6  
7 396 monitored for possible side effects, which will be managed in line with use of tocilizumab for  
8  
9 397 treating patients with RA.  
10

11  
12 398  
13

14 399 *After infusion*  
15

16 400 Participants will remain under observation for one-hour post-infusion. Participants will be  
17  
18 401 advised to seek help if they feel unwell after leaving the assessment centre and will be given  
19  
20 402 an information sheet containing a telephone number their health professionals can call. If  
21  
22 403 necessary, we will unblind the participant and inform their health professional whether they  
23  
24 404 received tocilizumab or normal saline. Adverse reactions will be recorded at each follow-up  
25  
26 405 visit. Additional, safety blood tests will be done at second follow-up (e.g., WBC count, liver  
27  
28 406 function, lipids).  
29  
30  
31  
32

33 407  
34

35 408 ETHICS AND DISSEMINATION  
36

37 409 The study will be conducted in accordance with the REC, Health Research Authority (HRA),  
38  
39 410 and local Research and Development (R&D) department approvals and guidelines (REC  
40  
41 411 reference: 22/EE/0010). The study team will prepare protocol amendments as required and  
42  
43 412 ethics approval will be sought before implementing any changes to the approved protocol.  
44  
45

46 413 The ISRCTN Trial Registry and the Research Governance Office will be informed of any  
47  
48 414 amendments to the protocol.  
49  
50

51 415  
52

53 416 **Consent**  
54

55 417 Informed consent will be obtained prior to eligibility assessments for participation in the  
56  
57 418 study. This will include consent to randomise, for contact with their GP to inform them about  
58  
59  
60

1  
2  
3 419 participation, access GP/psychiatric records to verify medical history to establish eligibility,  
4  
5 420 and to inform the participant's GP any results/outcomes as necessary. Consent for additional  
6  
7 421 tests to establish safety for tocilizumab infusion and for storing biological samples will also  
8  
9 422 be obtained.  
10  
11

12 423

#### 14 424 **Study management**

16  
17 425 The study is sponsored by the University of Bristol. The sponsor, the Chief Investigator  
18  
19 426 (GMK), and the co-Lead (RU) will have overall responsibility for the study. A named  
20  
21 427 principal investigator will take clinical responsibility for study activities at each site. The  
22  
23 428 study does not require the formal arrangement of a steering committee because, according to  
24  
25 429 the HRA, it is not a Clinical Trial of an Investigational Medicinal Product. However, to  
26  
27 430 enhance monitoring of the study, a study management group will be established, comprising  
28  
29 431 academic and clinical experts in psychiatry, rheumatology, neuroscience, and immunology.  
30  
31

32 432

#### 35 433 **Data management and retention of samples**

37 434 All potential participants will be assigned a unique study-specific participant ID number. All  
38  
39 435 data will be subject to good practice as laid down in the Data Protection Act. Each study  
40  
41 436 stage is tracked so that participant's (de-identified) status within the study is known, and  
42  
43 437 assessment and other appointment dates are forecasted. This information is held on a secure,  
44  
45 438 password-protected database. Anonymised data from assessments will be uploaded to a  
46  
47 439 secure, password-protected database using secure web-based data entry systems. Minimal  
48  
49 440 personal data (age, sex) will be indexed by each participant's unique ID number. Blood  
50  
51 441 samples collected in this study may be stored for up to 10 years after the completion for  
52  
53 442 additional research. Stored samples will be coded throughout the sample storage and analysis  
54  
55  
56  
57  
58  
59  
60

1  
2  
3 443 process and will not be labelled with personal identifiers. Participants may withdraw their  
4  
5 444 consent for their samples to be stored for future research.  
6  
7  
8 445

9  
10 446 **Dissemination plan**

11  
12 447 Study results will be published in peer-review journals and will conform to the guidelines of  
13  
14 448 the International Committee of Medical Journal Editors. Findings will be disseminated at  
15  
16 449 conferences, departmental talks, and via social and traditional media.  
17  
18  
19 450

20  
21 451 **AUTHORS CONTRIBUTIONS**

22  
23 452 ÉMF wrote first draft of the PIMS trial protocol and of this manuscript. SLG, MK, GKM,  
24  
25 453 BD, DJ, JS, and NMB contributed to study design and protocol development and revised  
26  
27 454 manuscript drafts. RU contributed to study design and study protocol, and revised manuscript  
28  
29 455 drafts. GMK devised study design and trial protocol, and revised drafts. ÉMF and SLG  
30  
31 456 developed study materials and liaised with REC and HRA regarding approvals. AM, JR,  
32  
33 457 FCZ, and HH contributed to the revision of the manuscript and validation of operating  
34  
35 458 procedures and mechanistic protocols. RU and GMK co-lead the MRC grant that funds the  
36  
37 459 PIMS trial and provide overall supervision and oversight for the project.  
38  
39  
40 460

41  
42 461 **FUNDING STATEMENT**

43  
44  
45 462 The PIMS trial is funded by a Medical Research Council (MRC) grant to RU and GMK;  
46  
47 463 Grant Ref: MR/S037675/1. ÉMF is supported by an MRC Integrative Epidemiology Unit  
48  
49 464 PhD Studentship. AM is supported by funding from the MRC for doctoral training  
50  
51 465 (MR/2434208). FCZ receives a PhD Fellowship from the São Paulo Research Foundation  
52  
53 466 (2019/13229-2 and 2021/07448-3). HH is supported by the PIMS Trial MRC grant  
54  
55 467 (MR/S037675/1). DJ is supported by the Cambridge Arthritis Research Endeavour and the  
56  
57  
58  
59  
60

1  
2  
3 468 National Institute for Health Research (NIHR) Cambridge Biomedical Research Centre  
4  
5 469 (BRC-1215-20014). NMB acknowledges funding support from the MRC (MR/R006008/1  
6  
7 470 and MR/N019016/1), Ministry of Defence (702931454), Diabetes UK (20/0006296), NIHR  
8  
9 471 (14/WM/0093), and Innovate UK (84361). RU has grants from MRC, NIHR: Health  
10  
11 472 Technology Assessment, European Commission - Research: The Seventh Framework  
12  
13 473 Programme, and personal fees from Sunovion, outside the submitted work. GMK  
14  
15 474 acknowledges funding support from the Wellcome Trust (Grant No. 201486/Z/16/Z). The  
16  
17 475 funders had no role in the design of this study.  
18  
19  
20  
21  
22 476

#### 23 477 COMPETING INTERESTS STATEMENT

24 478 ÉMF, SLG, AM, JR, FCZ, HH, MK, GKM, BD, DJ, JS, RU, and GMK have no conflicts of  
25  
26 479 interest to report. NMB holds shares and is a Director of Celentyx Ltd.  
27  
28  
29  
30  
31 480

## 481 REFERENCES

- 482 1 Khandaker GM, Cousins L, Deakin J, *et al.* Inflammation and immunity in schizophrenia: implications for pathophysiology and treatment. *Lancet Psychiatry* 2015;**2**:258–70. doi:10.1016/S2215-0366(14)00122-9
- 485 2 Khandaker GM, Dantzer R. Is there a role for immune-to-brain communication in schizophrenia? *Psychopharmacology* 2016;**233**:1559–73. doi:10.1007/s00213-015-3975-1
- 488 3 Khandaker GM, Dantzer R, Jones PB. Immunopsychiatry: important facts. *Psychol Med* 2017;**47**:2229–37. doi:10.1017/S0033291717000745
- 490 4 Upthegrove R, Khandaker G. Cytokines, Oxidative Stress and Cellular Markers of Inflammation in Schizophrenia. *Current topics in behavioral neurosciences* 2020;**44**:49–66. doi:10.1007/7854\_2018\_88
- 493 5 Upthegrove R, Manzanares-Teson N, Barnes NM. Cytokine function in medication-naive first episode psychosis: a systematic review and meta-analysis. *Schizophr Res* 2014;**155**:101–8. doi:10.1016/j.schres.2014.03.005
- 496 6 Goldsmith DR, Rapaport MH, Miller BJ. A meta-analysis of blood cytokine network alterations in psychiatric patients: comparisons between schizophrenia, bipolar disorder and depression. *Mol Psychiatry* 2016;**21**:1696–709. doi:10.1038/mp.2016.3
- 499 7 Miller BJ, Buckley P, Seabolt W, *et al.* Meta-analysis of cytokine alterations in schizophrenia: clinical status and antipsychotic effects. *Biological psychiatry* 2011;**70**:663–71. doi:10.1016/j.biopsych.2011.04.013
- 502 8 Potvin S, Stip E, Sepehry AA, *et al.* Inflammatory cytokine alterations in schizophrenia: a systematic quantitative review. *Biol Psychiatry* 2008;**63**:801–8. doi:10.1016/j.biopsych.2007.09.024
- 505 9 Wang AK, Miller BJ. Meta-analysis of Cerebrospinal Fluid Cytokine and Tryptophan Catabolite Alterations in Psychiatric Patients: Comparisons Between Schizophrenia, Bipolar Disorder, and Depression. *Schizophr Bull* 2018;**44**:75–83. doi:10.1093/schbul/sbx035
- 509 10 Khandaker GM, Zimbron J, Dalman C, *et al.* Childhood infection and adult schizophrenia: a meta-analysis of population-based studies. *Schizophr Res* 2012;**139**:161–8. doi:10.1016/j.schres.2012.05.023
- 512 11 Khandaker GM, Zimbron J, Lewis G, *et al.* Prenatal maternal infection, neurodevelopment and adult schizophrenia: a systematic review of population-based studies. *Psychol Med* 2013;**43**:239–57. doi:10.1017/S0033291712000736
- 515 12 Khandaker GM, Zammit S, Burgess S, *et al.* Association between a functional interleukin 6 receptor genetic variant and risk of depression and psychosis in a population-based birth cohort. *Brain Behav Immun* 2018;**69**:264–72. doi:10.1016/j.bbi.2017.11.020
- 518 13 Perry BI, Upthegrove R, Kappelmann N, *et al.* Associations of immunological proteins/traits with schizophrenia, major depression and bipolar disorder: A bi-directional

- 1  
2  
3 520 two-sample mendelian randomization study. *Brain, Behavior, and Immunity*  
4 521 2021;**97**:176–85. doi:10.1016/j.bbi.2021.07.009  
5  
6 522 14 Williams JA, Burgess S, Suckling J, *et al.* Inflammation and Brain Structure in  
7 523 Schizophrenia and Other Neuropsychiatric Disorders: A Mendelian Randomization  
8 524 Study. *JAMA Psychiatry* 2022;**79**:498. doi:10.1001/jamapsychiatry.2022.0407  
9  
10 525 15 Kose M, Pariante CM, Dazzan P, *et al.* The Role of Peripheral Inflammation in Clinical  
11 526 Outcome and Brain Imaging Abnormalities in Psychosis: A Systematic Review. *Front*  
12 527 *Psychiatry* 2021;**12**:612471. doi:10.3389/fpsy.2021.612471  
13  
14 528 16 Lesh TA, Careaga M, Rose DR, *et al.* Cytokine alterations in first-episode schizophrenia  
15 529 and bipolar disorder: relationships to brain structure and symptoms. *Journal of*  
16 530 *Neuroinflammation* 2018;**15**:165. doi:10.1186/s12974-018-1197-2  
17  
18 531 17 Trépanier MO, Hopperton KE, Mizrahi R, *et al.* Postmortem evidence of cerebral  
19 532 inflammation in schizophrenia: a systematic review. *Mol Psychiatry* 2016;**21**:1009–26.  
20 533 doi:10.1038/mp.2016.90  
21  
22 534 18 van Kesteren CFMG, Gremmels H, de Witte LD, *et al.* Immune involvement in the  
23 535 pathogenesis of schizophrenia: a meta-analysis on postmortem brain studies. *Transl*  
24 536 *Psychiatry* 2017;**7**:e1075–e1075. doi:10.1038/tp.2017.4  
25  
26 537 19 Marques TR, Ashok AH, Pillinger T, *et al.* Neuroinflammation in schizophrenia: meta-  
27 538 analysis of in vivo microglial imaging studies. *Psychological Medicine* 2019;**49**:2186–96.  
28 539 doi:10.1017/S0033291718003057  
29  
30 540 20 Murray AJ, Rogers JC, Katshu MZUH, *et al.* Oxidative Stress and the Pathophysiology  
31 541 and Symptom Profile of Schizophrenia Spectrum Disorders. *Frontiers in Psychiatry*  
32 542 2021;**12**.<https://www.frontiersin.org/articles/10.3389/fpsy.2021.703452> (accessed 9 Aug  
33 543 2022).  
34  
35 544 21 Upthegrove R. The immune system and schizophrenia: An update for clinicians.  
36 545 *Advances in Psychiatric Treatment* 2014;**20**:83–91. doi:10.1192/apt.bp.113.011452  
37  
38 546 22 Conen S, Gregory CJ, Hinz R, *et al.* Neuroinflammation as measured by positron  
39 547 emission tomography in patients with recent onset and established schizophrenia:  
40 548 implications for immune pathogenesis. *Mol Psychiatry* 2021;**26**:5398–406.  
41 549 doi:10.1038/s41380-020-0829-y  
42  
43 550 23 van Mierlo HC, Schot A, Boks MPM, *et al.* The association between schizophrenia and  
44 551 the immune system: Review of the evidence from unbiased ‘omic-studies.’ *Schizophrenia*  
45 552 *Research* 2020;**217**:114–23. doi:10.1016/j.schres.2019.05.028  
46  
47 553 24 Plavén-Sigray P, Matheson GJ, Collste K, *et al.* Positron Emission Tomography Studies  
48 554 of the Glial Cell Marker Translocator Protein in Patients With Psychosis: A Meta-  
49 555 analysis Using Individual Participant Data. *Biological Psychiatry* 2018;**84**:433–42.  
50 556 doi:10.1016/j.biopsych.2018.02.1171  
51  
52 557 25 Plavén-Sigray P, Matheson GJ, Coughlin JM, *et al.* Meta-analysis of the Glial Marker  
53 558 TSPO in Psychosis Revisited: Reconciling Inconclusive Findings of Patient-Control  
54 559 Differences. *Biol Psychiatry* 2021;**89**:e5–8. doi:10.1016/j.biopsych.2020.05.028



- 1  
2  
3 560 26 Deakin B, Suckling J, Barnes TRE, *et al.* The benefit of minocycline on negative  
4 561 symptoms of schizophrenia in patients with recent-onset psychosis (BeneMin): a  
5 562 randomised, double-blind, placebo-controlled trial. *The Lancet Psychiatry* 2018;**5**:885–  
6 563 94. doi:10.1016/S2215-0366(18)30345-6  
7  
8  
9 564 27 Weiser M, Levi L, Burshtein S, *et al.* The effect of minocycline on symptoms in  
10 565 schizophrenia: Results from a randomized controlled trial. *Schizophrenia Research*  
11 566 2019;**206**:325–32. doi:10.1016/j.schres.2018.10.023  
12  
13 567 28 Ramaker RC, Bowling KM, Lasseigne BN, *et al.* Post-mortem molecular profiling of  
14 568 three psychiatric disorders. *Genome Medicine* 2017;**9**:72. doi:10.1186/s13073-017-0458-  
15 569 5  
16  
17  
18 570 29 González-Peñas J, Costas J, Villamayor MJG, *et al.* Enrichment of rare genetic variants  
19 571 in astrocyte gene enriched co-expression modules altered in postmortem brain samples of  
20 572 schizophrenia. *Neurobiology of Disease* 2019;**121**:305–14.  
21 573 doi:10.1016/j.nbd.2018.10.013  
22  
23 574 30 Gandal MJ, Zhang P, Hadjimichael E, *et al.* Transcriptome-wide isoform-level  
24 575 dysregulation in ASD, schizophrenia, and bipolar disorder. *Science* 2018;**362**:eaat8127.  
25 576 doi:10.1126/science.aat8127  
26  
27  
28 577 31 Gandal MJ, Haney JR, Parikshak NN, *et al.* Shared molecular neuropathology across  
29 578 major psychiatric disorders parallels polygenic overlap. *Science* 2018;**359**:693–7.  
30 579 doi:10.1126/science.aad6469  
31  
32 580 32 Toker L, Mancarci BO, Tripathy S, *et al.* Transcriptomic Evidence for Alterations in  
33 581 Astrocytes and Parvalbumin Interneurons in Subjects With Bipolar Disorder and  
34 582 Schizophrenia. *Biological Psychiatry* 2018;**84**:787–96.  
35 583 doi:10.1016/j.biopsych.2018.07.010  
36  
37  
38 584 33 Corsi-Zuelli F, Deakin B. Impaired regulatory T cell control of astroglial overdrive and  
39 585 microglial pruning in schizophrenia. *Neuroscience & Biobehavioral Reviews*  
40 586 2021;**125**:637–53. doi:10.1016/j.neubiorev.2021.03.004  
41  
42 587 34 Corsi-Zuelli F, Deakin B, de Lima MHF, *et al.* T regulatory cells as a potential  
43 588 therapeutic target in psychosis? Current challenges and future perspectives. *Brain,*  
44 589 *Behavior, & Immunity - Health* 2021;**17**:100330. doi:10.1016/j.bbih.2021.100330  
45  
46  
47 590 35 Jeppesen R, Christensen RHB, Pedersen EMJ, *et al.* Efficacy and safety of anti-  
48 591 inflammatory agents in treatment of psychotic disorders – A comprehensive systematic  
49 592 review and meta-analysis. *Brain, Behavior, and Immunity* 2020;**90**:364–80.  
50 593 doi:10.1016/j.bbi.2020.08.028  
51  
52 594 36 Girgis RR, Ciarleglio A, Choo T, *et al.* A Randomized, Double-Blind, Placebo-  
53 595 Controlled Clinical Trial of Tocilizumab, An Interleukin-6 Receptor Antibody, For  
54 596 Residual Symptoms in Schizophrenia. *Neuropsychopharmacology : official publication*  
55 597 *of the American College of Neuropsychopharmacology* 2018;**43**:1317–23.  
56 598 doi:10.1038/npp.2017.258  
57  
58  
59  
60

- 1  
2  
3 599 37 Mondelli V, Ciufolini S, Belvederi Murri M, *et al.* Cortisol and Inflammatory Biomarkers  
4 600 Predict Poor Treatment Response in First Episode Psychosis. *Schizophrenia bulletin*  
5 601 2015;**41**:1162–70. doi:10.1093/schbul/sbv028  
6  
7 602 38 Miller BJ, Culpepper N, Rapaport MH. C-reactive protein levels in schizophrenia: a  
8 603 review and meta-analysis. *Clinical schizophrenia & related psychoses* 2014;**7**:223–30.  
9 604 doi:10.3371/CSRP.MICU.020813  
10  
11 605 39 Raison CL, Rutherford RE, Woolwine BJ, *et al.* A randomized controlled trial of the  
12 606 tumor necrosis factor antagonist infliximab for treatment-resistant depression: The role of  
13 607 baseline inflammatory biomarkers. *JAMA Psychiatry* 2013;**70**:31–41.  
14 608 doi:10.1001/2013.jamapsychiatry.4  
15  
16 609 40 Khandaker GM, Stochl J, Zammit S, *et al.* Association between circulating levels of C-  
17 610 reactive protein and positive and negative symptoms of psychosis in adolescents in a  
18 611 general population birth cohort. *J Psychiatr Res* 2021;**143**:534–42.  
19 612 doi:10.1016/j.jpsychires.2020.11.028  
20  
21 613 41 Edwards CJ, Cella M, Tarrrier N, *et al.* Investigating the empirical support for therapeutic  
22 614 targets proposed by the temporal experience of pleasure model in schizophrenia: A  
23 615 systematic review. *Schizophrenia research* 2015;**168**:120–44.  
24 616 doi:10.1016/j.schres.2015.08.013  
25  
26 617 42 Lalousis PA, Schmaal L, Wood SJ, *et al.* Neurobiologically Based Stratification of  
27 618 Recent-Onset Depression and Psychosis: Identification of Two Distinct Transdiagnostic  
28 619 Phenotypes. *Biological Psychiatry* 2022;:S0006322322011568.  
29 620 doi:10.1016/j.biopsych.2022.03.021  
30  
31 621 43 Fioravanti M, Carlone O, Vitale B, *et al.* A Meta-Analysis of Cognitive Deficits in Adults  
32 622 with a Diagnosis of Schizophrenia. *Neuropsychol Rev* 2005;**15**:73–95.  
33 623 doi:10.1007/s11065-005-6254-9  
34  
35 624 44 Keefe RSE, Bilder RM, Davis SM, *et al.* Neurocognitive Effects of Antipsychotic  
36 625 Medications in Patients With Chronic Schizophrenia in the CATIE Trial. *Archives of*  
37 626 *General Psychiatry* 2007;**64**:633–47. doi:10.1001/archpsyc.64.6.633  
38  
39 627 45 Chan A-W, Tetzlaff JM, Altman DG, *et al.* SPIRIT 2013 Statement: defining standard  
40 628 protocol items for clinical trials. *Rev Panam Salud Publica* 2015;**38**:506–14.  
41  
42 629 46 Calabrese LH, Rose-John S. IL-6 biology: implications for clinical targeting in rheumatic  
43 630 disease. *Nature reviews Rheumatology* 2014;**10**:720–7. doi:10.1038/nrrheum.2014.127  
44  
45 631 47 Choy EHS, Isenberg DA, Garrod T, *et al.* Therapeutic benefit of blocking interleukin-6  
46 632 activity with an anti-interleukin-6 receptor monoclonal antibody in rheumatoid arthritis:  
47 633 a randomized, double-blind, placebo-controlled, dose-escalation trial. *Arthritis and*  
48 634 *rheumatism* 2002;**46**:3143–50. doi:10.1002/art.10623  
49  
50 635 48 Woo P, Wilkinson N, Prieur A-M, *et al.* Open label phase II trial of single, ascending  
51 636 doses of MRA in Caucasian children with severe systemic juvenile idiopathic arthritis:  
52 637 proof of principle of the efficacy of IL-6 receptor blockade in this type of arthritis and  
53 638 demonstration of prolonged clinical improvement. *Arthritis research & therapy*  
54 639 2005;**7**:R1281-8. doi:10.1186/ar1826



1  
2  
3  
4  
5  
6  
7  
8  
9  
10  
11  
12  
13  
14  
15  
16  
17  
18  
19  
20  
21  
22  
23  
24  
25  
26  
27  
28  
29  
30  
31  
32  
33  
34  
35  
36  
37  
38  
39  
40  
41  
42  
43  
44  
45  
46  
47  
48  
49  
50  
51  
52  
53  
54  
55  
56  
57  
58  
59  
60

640 49 Gard DE, Gard MG, Kring AM, *et al.* Anticipatory and consummatory components of the  
641 experience of pleasure: A scale development study. *Journal of Research in Personality*  
642 2006;**40**:1086–102. doi:10.1016/j.jrp.2005.11.001

643

644

For peer review only

1  
2  
3 645 FIGURE LEGEND  
4

5 646 Figure 1. Overview of study design  
6  
7  
8  
9  
10  
11  
12  
13  
14  
15  
16  
17  
18  
19  
20  
21  
22  
23  
24  
25  
26  
27  
28  
29  
30  
31  
32  
33  
34  
35  
36  
37  
38  
39  
40  
41  
42  
43  
44  
45  
46  
47  
48  
49  
50  
51  
52  
53  
54  
55  
56  
57  
58  
59  
60

For peer review only

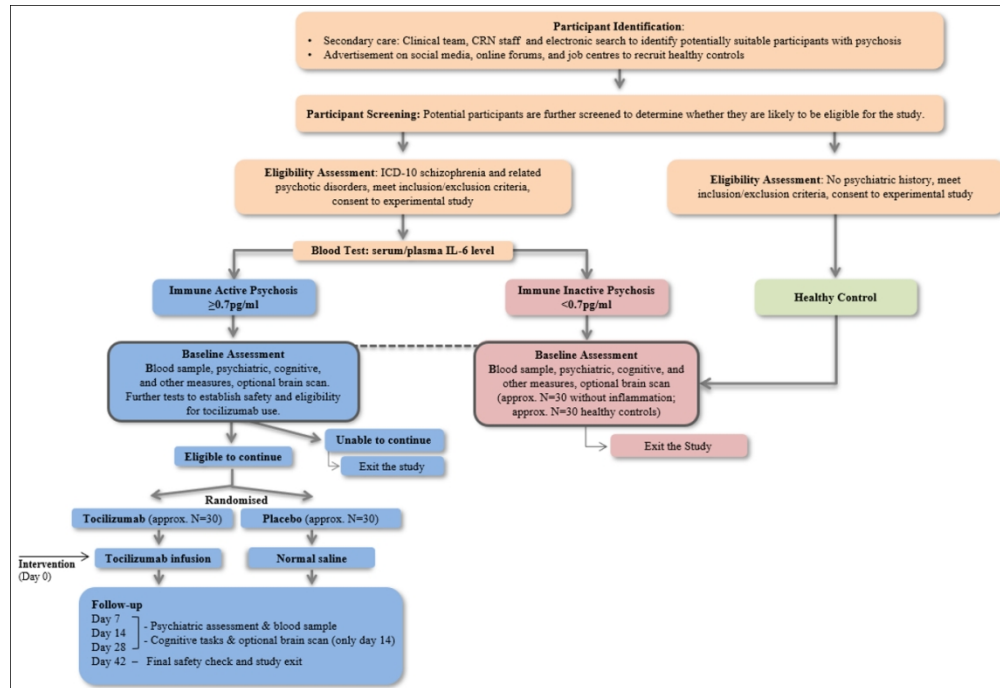

Figure 1. Overview of study design

240x165mm (144 x 144 DPI)

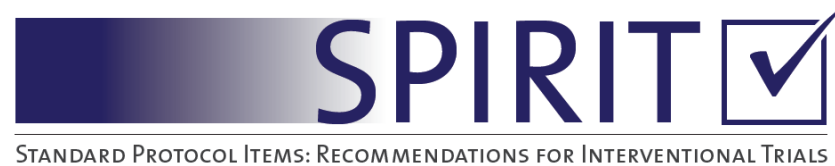

**Foley et al. Protocol for the Psychosis Immune Mechanism Stratified Medicine (PIMS) trial: A randomised double-blind placebo-controlled trial of single dose tocilizumab in patients with psychosis.**

**eTable1:** SPIRIT 2013 Checklist – Recommended items to address in a clinical trial protocol and related documents\*

| Section/item                      | Item No | Description                                                                                                                                                                                                                                                                              | Addressed on page number  |
|-----------------------------------|---------|------------------------------------------------------------------------------------------------------------------------------------------------------------------------------------------------------------------------------------------------------------------------------------------|---------------------------|
| <b>Administrative information</b> |         |                                                                                                                                                                                                                                                                                          |                           |
| Title                             | 1       | Descriptive title identifying the study design, population, interventions, and, if applicable, trial acronym                                                                                                                                                                             | 1                         |
| Trial registration                | 2a      | Trial identifier and registry name. If not yet registered, name of intended registry                                                                                                                                                                                                     | 4                         |
|                                   | 2b      | All items from the World Health Organization Trial Registration Data Set                                                                                                                                                                                                                 | 4<br>(ISRCTN<br>23256704) |
| Protocol version                  | 3       | Date and version identifier                                                                                                                                                                                                                                                              | -                         |
| Funding                           | 4       | Sources and types of financial, material, and other support                                                                                                                                                                                                                              | 24 - 25                   |
| Roles and responsibilities        | 5a      | Names, affiliations, and roles of protocol contributors                                                                                                                                                                                                                                  | 1, 24                     |
|                                   | 5b      | Name and contact information for the trial sponsor                                                                                                                                                                                                                                       | 23                        |
|                                   | 5c      | Role of study sponsor and funders, if any, in study design; collection, management, analysis, and interpretation of data; writing of the report; and the decision to submit the report for publication, including whether they will have ultimate authority over any of these activities | 23-25                     |

1  
2  
3  
4  
5  
6  
7  
8  
9  
10  
11  
12  
13  
14  
15  
16  
17  
18  
19  
20  
21  
22  
23  
24  
25  
26  
27  
28  
29  
30  
31  
32  
33  
34  
35  
36  
37  
38  
39  
40  
41  
42  
43  
44  
45  
46

|                                                           |     |                                                                                                                                                                                                                                                                  |                         |
|-----------------------------------------------------------|-----|------------------------------------------------------------------------------------------------------------------------------------------------------------------------------------------------------------------------------------------------------------------|-------------------------|
|                                                           | 5d  | Composition, roles, and responsibilities of the coordinating centre, steering committee, endpoint adjudication committee, data management team, and other individuals or groups overseeing the trial, if applicable (see Item 21a for data monitoring committee) | 23 - 25                 |
| <b>Introduction</b>                                       |     |                                                                                                                                                                                                                                                                  |                         |
| Background and rationale                                  | 6a  | Description of research question and justification for undertaking the trial, including summary of relevant studies (published and unpublished) examining benefits and harms for each intervention                                                               | 6-9                     |
|                                                           | 6b  | Explanation for choice of comparators                                                                                                                                                                                                                            | 6-9                     |
| Objectives                                                | 7   | Specific objectives or hypotheses                                                                                                                                                                                                                                | 9-10                    |
| Trial design                                              | 8   | Description of trial design including type of trial (eg, parallel group, crossover, factorial, single group), allocation ratio, and framework (eg, superiority, equivalence, noninferiority, exploratory)                                                        | 9                       |
| <b>Methods: Participants, interventions, and outcomes</b> |     |                                                                                                                                                                                                                                                                  |                         |
| Study setting                                             | 9   | Description of study settings (e.g., community clinic, academic hospital) and list of countries where data will be collected. Reference to where list of study sites can be obtained                                                                             | 9, 11                   |
| Eligibility criteria                                      | 10  | Inclusion and exclusion criteria for participants. If applicable, eligibility criteria for study centres and individuals who will perform the interventions (eg, surgeons, psychotherapists)                                                                     | 12, Table 1             |
| Interventions                                             | 11a | Interventions for each group with sufficient detail to allow replication, including how and when they will be administered                                                                                                                                       | 11, 19, 21-22, Figure 1 |
|                                                           | 11b | Criteria for discontinuing or modifying allocated interventions for a given trial participant (eg, drug dose change in response to harms, participant request, or improving/worsening disease)                                                                   | 22                      |
|                                                           | 11c | Strategies to improve adherence to intervention protocols, and any procedures for monitoring adherence (eg, drug tablet return, laboratory tests)                                                                                                                | -                       |
|                                                           | 11d | Relevant concomitant care and interventions that are permitted or prohibited during the trial                                                                                                                                                                    | 12, Table 1             |

|    |                                                                     |     |                                                                                                                                                                                                                                                                                                                                                                                |                         |
|----|---------------------------------------------------------------------|-----|--------------------------------------------------------------------------------------------------------------------------------------------------------------------------------------------------------------------------------------------------------------------------------------------------------------------------------------------------------------------------------|-------------------------|
| 1  | Outcomes                                                            | 12  | Primary, secondary, and other outcomes, including the specific measurement variable (eg, systolic blood pressure), analysis metric (eg, change from baseline, final value, time to event), method of aggregation (eg, median, proportion), and time point for each outcome. Explanation of the clinical relevance of chosen efficacy and harm outcomes is strongly recommended | 9-10, Figure 1, Table 2 |
| 2  |                                                                     |     |                                                                                                                                                                                                                                                                                                                                                                                |                         |
| 3  |                                                                     |     |                                                                                                                                                                                                                                                                                                                                                                                |                         |
| 4  |                                                                     |     |                                                                                                                                                                                                                                                                                                                                                                                |                         |
| 5  |                                                                     |     |                                                                                                                                                                                                                                                                                                                                                                                |                         |
| 6  | Participant timeline                                                | 13  | Time schedule of enrolment, interventions (including any run-ins and washouts), assessments, and visits for participants. A schematic diagram is highly recommended (see Figure)                                                                                                                                                                                               | 18-19, Figure 1         |
| 7  |                                                                     |     |                                                                                                                                                                                                                                                                                                                                                                                |                         |
| 8  |                                                                     |     |                                                                                                                                                                                                                                                                                                                                                                                |                         |
| 9  | Sample size                                                         | 14  | Estimated number of participants needed to achieve study objectives and how it was determined, including clinical and statistical assumptions supporting any sample size calculations                                                                                                                                                                                          | 17                      |
| 10 |                                                                     |     |                                                                                                                                                                                                                                                                                                                                                                                |                         |
| 11 |                                                                     |     |                                                                                                                                                                                                                                                                                                                                                                                |                         |
| 12 |                                                                     |     |                                                                                                                                                                                                                                                                                                                                                                                |                         |
| 13 | Recruitment                                                         | 15  | Strategies for achieving adequate participant enrolment to reach target sample size                                                                                                                                                                                                                                                                                            | 18                      |
| 14 |                                                                     |     |                                                                                                                                                                                                                                                                                                                                                                                |                         |
| 15 | <b>Methods: Assignment of interventions (for controlled trials)</b> |     |                                                                                                                                                                                                                                                                                                                                                                                |                         |
| 16 | <b>Allocation:</b>                                                  |     |                                                                                                                                                                                                                                                                                                                                                                                |                         |
| 17 |                                                                     |     |                                                                                                                                                                                                                                                                                                                                                                                |                         |
| 18 | Sequence generation                                                 | 16a | Method of generating the allocation sequence (eg, computer-generated random numbers), and list of any factors for stratification. To reduce predictability of a random sequence, details of any planned restriction (eg, blocking) should be provided in a separate document that is unavailable to those who enrol participants or assign interventions                       | 17                      |
| 19 |                                                                     |     |                                                                                                                                                                                                                                                                                                                                                                                |                         |
| 20 |                                                                     |     |                                                                                                                                                                                                                                                                                                                                                                                |                         |
| 21 |                                                                     |     |                                                                                                                                                                                                                                                                                                                                                                                |                         |
| 22 |                                                                     |     |                                                                                                                                                                                                                                                                                                                                                                                |                         |
| 23 |                                                                     |     |                                                                                                                                                                                                                                                                                                                                                                                |                         |
| 24 |                                                                     |     |                                                                                                                                                                                                                                                                                                                                                                                |                         |
| 25 | Allocation concealment mechanism                                    | 16b | Mechanism of implementing the allocation sequence (eg, central telephone; sequentially numbered, opaque, sealed envelopes), describing any steps to conceal the sequence until interventions are assigned                                                                                                                                                                      | 17                      |
| 26 |                                                                     |     |                                                                                                                                                                                                                                                                                                                                                                                |                         |
| 27 |                                                                     |     |                                                                                                                                                                                                                                                                                                                                                                                |                         |
| 28 |                                                                     |     |                                                                                                                                                                                                                                                                                                                                                                                |                         |
| 29 | Implementation                                                      | 16c | Who will generate the allocation sequence, who will enrol participants, and who will assign participants to interventions                                                                                                                                                                                                                                                      | 17                      |
| 30 |                                                                     |     |                                                                                                                                                                                                                                                                                                                                                                                |                         |
| 31 |                                                                     |     |                                                                                                                                                                                                                                                                                                                                                                                |                         |
| 32 |                                                                     |     |                                                                                                                                                                                                                                                                                                                                                                                |                         |
| 33 | Blinding (masking)                                                  | 17a | Who will be blinded after assignment to interventions (eg, trial participants, care providers, outcome assessors, data analysts), and how                                                                                                                                                                                                                                      | 17                      |
| 34 |                                                                     |     |                                                                                                                                                                                                                                                                                                                                                                                |                         |
| 35 |                                                                     |     |                                                                                                                                                                                                                                                                                                                                                                                |                         |
| 36 |                                                                     | 17b | If blinded, circumstances under which unblinding is permissible, and procedure for revealing a participant's allocated intervention during the trial                                                                                                                                                                                                                           | 22                      |
| 37 |                                                                     |     |                                                                                                                                                                                                                                                                                                                                                                                |                         |
| 38 |                                                                     |     |                                                                                                                                                                                                                                                                                                                                                                                |                         |
| 39 |                                                                     |     |                                                                                                                                                                                                                                                                                                                                                                                |                         |
| 40 |                                                                     |     |                                                                                                                                                                                                                                                                                                                                                                                |                         |
| 41 |                                                                     |     |                                                                                                                                                                                                                                                                                                                                                                                |                         |
| 42 |                                                                     |     |                                                                                                                                                                                                                                                                                                                                                                                |                         |
| 43 |                                                                     |     |                                                                                                                                                                                                                                                                                                                                                                                |                         |
| 44 |                                                                     |     |                                                                                                                                                                                                                                                                                                                                                                                |                         |
| 45 |                                                                     |     |                                                                                                                                                                                                                                                                                                                                                                                |                         |
| 46 |                                                                     |     |                                                                                                                                                                                                                                                                                                                                                                                |                         |

1  
2  
3  
4  
5  
6  
7  
8  
9  
10  
11  
12  
13  
14  
15  
16  
17  
18  
19  
20  
21  
22  
23  
24  
25  
26  
27  
28  
29  
30  
31  
32  
33  
34  
35  
36  
37  
38  
39  
40  
41  
42  
43  
44  
45  
46**Methods: Data collection, management, and analysis**

|                            |     |                                                                                                                                                                                                                                                                                                                                                                                                              |                       |
|----------------------------|-----|--------------------------------------------------------------------------------------------------------------------------------------------------------------------------------------------------------------------------------------------------------------------------------------------------------------------------------------------------------------------------------------------------------------|-----------------------|
| Data collection methods    | 18a | Plans for assessment and collection of outcome, baseline, and other trial data, including any related processes to promote data quality (eg, duplicate measurements, training of assessors) and a description of study instruments (eg, questionnaires, laboratory tests) along with their reliability and validity, if known. Reference to where data collection forms can be found, if not in the protocol | 10-15, 18-19, Table 2 |
|                            | 18b | Plans to promote participant retention and complete follow-up, including list of any outcome data to be collected for participants who discontinue or deviate from intervention protocols                                                                                                                                                                                                                    | 17-18                 |
| Data management            | 19  | Plans for data entry, coding, security, and storage, including any related processes to promote data quality (eg, double data entry; range checks for data values). Reference to where details of data management procedures can be found, if not in the protocol                                                                                                                                            | 23-24                 |
| Statistical methods        | 20a | Statistical methods for analysing primary and secondary outcomes. Reference to where other details of the statistical analysis plan can be found, if not in the protocol                                                                                                                                                                                                                                     | 17-18                 |
|                            | 20b | Methods for any additional analyses (eg, subgroup and adjusted analyses)                                                                                                                                                                                                                                                                                                                                     | 17-18                 |
|                            | 20c | Definition of analysis population relating to protocol non-adherence (eg, as randomised analysis), and any statistical methods to handle missing data (eg, multiple imputation)                                                                                                                                                                                                                              | -                     |
| <b>Methods: Monitoring</b> |     |                                                                                                                                                                                                                                                                                                                                                                                                              |                       |
| Data monitoring            | 21a | Composition of data monitoring committee (DMC); summary of its role and reporting structure; statement of whether it is independent from the sponsor and competing interests; and reference to where further details about its charter can be found, if not in the protocol. Alternatively, an explanation of why a DMC is not needed                                                                        | 23                    |
|                            | 21b | Description of any interim analyses and stopping guidelines, including who will have access to these interim results and make the final decision to terminate the trial                                                                                                                                                                                                                                      | -                     |
| Harms                      | 22  | Plans for collecting, assessing, reporting, and managing solicited and spontaneously reported adverse events and other unintended effects of trial interventions or trial conduct                                                                                                                                                                                                                            | 20-22                 |

|    |                                 |     |                                                                                                                                                                                                                                                                                     |       |
|----|---------------------------------|-----|-------------------------------------------------------------------------------------------------------------------------------------------------------------------------------------------------------------------------------------------------------------------------------------|-------|
| 1  | Auditing                        | 23  | Frequency and procedures for auditing trial conduct, if any, and whether the process will be independent from investigators and the sponsor                                                                                                                                         | -     |
| 2  |                                 |     |                                                                                                                                                                                                                                                                                     |       |
| 3  |                                 |     |                                                                                                                                                                                                                                                                                     |       |
| 4  | <b>Ethics and dissemination</b> |     |                                                                                                                                                                                                                                                                                     |       |
| 5  |                                 |     |                                                                                                                                                                                                                                                                                     |       |
| 6  | Research ethics approval        | 24  | Plans for seeking research ethics committee/institutional review board (REC/IRB) approval                                                                                                                                                                                           | 22    |
| 7  |                                 |     |                                                                                                                                                                                                                                                                                     |       |
| 8  |                                 |     |                                                                                                                                                                                                                                                                                     |       |
| 9  | Protocol amendments             | 25  | Plans for communicating important protocol modifications (eg, changes to eligibility criteria, outcomes, analyses) to relevant parties (eg, investigators, REC/IRBs, trial participants, trial registries, journals, regulators)                                                    | 22    |
| 10 |                                 |     |                                                                                                                                                                                                                                                                                     |       |
| 11 |                                 |     |                                                                                                                                                                                                                                                                                     |       |
| 12 |                                 |     |                                                                                                                                                                                                                                                                                     |       |
| 13 |                                 |     |                                                                                                                                                                                                                                                                                     |       |
| 14 | Consent or assent               | 26a | Who will obtain informed consent or assent from potential trial participants or authorised surrogates, and how (see Item 32)                                                                                                                                                        | 22-23 |
| 15 |                                 |     |                                                                                                                                                                                                                                                                                     |       |
| 16 |                                 |     |                                                                                                                                                                                                                                                                                     |       |
| 17 |                                 | 26b | Additional consent provisions for collection and use of participant data and biological specimens in ancillary studies, if applicable                                                                                                                                               | 22-23 |
| 18 |                                 |     |                                                                                                                                                                                                                                                                                     |       |
| 19 |                                 |     |                                                                                                                                                                                                                                                                                     |       |
| 20 | Confidentiality                 | 27  | How personal information about potential and enrolled participants will be collected, shared, and maintained in order to protect confidentiality before, during, and after the trial                                                                                                | 23-24 |
| 21 |                                 |     |                                                                                                                                                                                                                                                                                     |       |
| 22 |                                 |     |                                                                                                                                                                                                                                                                                     |       |
| 23 |                                 |     |                                                                                                                                                                                                                                                                                     |       |
| 24 | Declaration of interests        | 28  | Financial and other competing interests for principal investigators for the overall trial and each study site                                                                                                                                                                       | 25    |
| 25 |                                 |     |                                                                                                                                                                                                                                                                                     |       |
| 26 |                                 |     |                                                                                                                                                                                                                                                                                     |       |
| 27 | Access to data                  | 29  | Statement of who will have access to the final trial dataset, and disclosure of contractual agreements that limit such access for investigators                                                                                                                                     | 23    |
| 28 |                                 |     |                                                                                                                                                                                                                                                                                     |       |
| 29 |                                 |     |                                                                                                                                                                                                                                                                                     |       |
| 30 | Ancillary and post-trial care   | 30  | Provisions, if any, for ancillary and post-trial care, and for compensation to those who suffer harm from trial participation                                                                                                                                                       | 22    |
| 31 |                                 |     |                                                                                                                                                                                                                                                                                     |       |
| 32 |                                 |     |                                                                                                                                                                                                                                                                                     |       |
| 33 | Dissemination policy            | 31a | Plans for investigators and sponsor to communicate trial results to participants, healthcare professionals, the public, and other relevant groups (eg, via publication, reporting in results databases, or other data sharing arrangements), including any publication restrictions | 24    |
| 34 |                                 |     |                                                                                                                                                                                                                                                                                     |       |
| 35 |                                 |     |                                                                                                                                                                                                                                                                                     |       |
| 36 |                                 |     |                                                                                                                                                                                                                                                                                     |       |
| 37 |                                 |     |                                                                                                                                                                                                                                                                                     |       |
| 38 |                                 | 31b | Authorship eligibility guidelines and any intended use of professional writers                                                                                                                                                                                                      | 24    |
| 39 |                                 |     |                                                                                                                                                                                                                                                                                     |       |
| 40 |                                 | 31c | Plans, if any, for granting public access to the full protocol, participant-level dataset, and statistical code                                                                                                                                                                     | -     |
| 41 |                                 |     |                                                                                                                                                                                                                                                                                     |       |
| 42 |                                 |     |                                                                                                                                                                                                                                                                                     |       |



|                            |    |                                                                                                                                                                                                |                            |
|----------------------------|----|------------------------------------------------------------------------------------------------------------------------------------------------------------------------------------------------|----------------------------|
| <b>Appendices</b>          |    |                                                                                                                                                                                                |                            |
| Informed consent materials | 32 | Model consent form and other related documentation given to participants and authorised surrogates                                                                                             | Available in full protocol |
| Biological specimens       | 33 | Plans for collection, laboratory evaluation, and storage of biological specimens for genetic or molecular analysis in the current trial and for future use in ancillary studies, if applicable | 23-24                      |

\*It is strongly recommended that this checklist be read in conjunction with the SPIRIT 2013 Explanation & Elaboration for important clarification on the items. Amendments to the protocol should be tracked and dated. The SPIRIT checklist is copyrighted by the SPIRIT Group under the Creative Commons "[Attribution-NonCommercial-NoDerivs 3.0 Unported](#)" license.

peer review only

# BMJ Open

## Protocol for the Psychosis Immune Mechanism Stratified Medicine (PIMS) trial: A randomised double-blind placebo-controlled trial of single dose tocilizumab in patients with psychosis

|                                 |                                                                                                                                                                                                                                                                                                                                                                                                                                                                                                                                                                                                                                                                                                                                                                                                                                                                                                                                                                                                                                                                                                                                                                                                                                                                                                                                                                                                                                                                                                                                                                                                                                                                                                                                                                                                                                                                                                                                                                                                                           |
|---------------------------------|---------------------------------------------------------------------------------------------------------------------------------------------------------------------------------------------------------------------------------------------------------------------------------------------------------------------------------------------------------------------------------------------------------------------------------------------------------------------------------------------------------------------------------------------------------------------------------------------------------------------------------------------------------------------------------------------------------------------------------------------------------------------------------------------------------------------------------------------------------------------------------------------------------------------------------------------------------------------------------------------------------------------------------------------------------------------------------------------------------------------------------------------------------------------------------------------------------------------------------------------------------------------------------------------------------------------------------------------------------------------------------------------------------------------------------------------------------------------------------------------------------------------------------------------------------------------------------------------------------------------------------------------------------------------------------------------------------------------------------------------------------------------------------------------------------------------------------------------------------------------------------------------------------------------------------------------------------------------------------------------------------------------------|
| Journal:                        | <i>BMJ Open</i>                                                                                                                                                                                                                                                                                                                                                                                                                                                                                                                                                                                                                                                                                                                                                                                                                                                                                                                                                                                                                                                                                                                                                                                                                                                                                                                                                                                                                                                                                                                                                                                                                                                                                                                                                                                                                                                                                                                                                                                                           |
| Manuscript ID                   | bmjopen-2022-067944.R1                                                                                                                                                                                                                                                                                                                                                                                                                                                                                                                                                                                                                                                                                                                                                                                                                                                                                                                                                                                                                                                                                                                                                                                                                                                                                                                                                                                                                                                                                                                                                                                                                                                                                                                                                                                                                                                                                                                                                                                                    |
| Article Type:                   | Protocol                                                                                                                                                                                                                                                                                                                                                                                                                                                                                                                                                                                                                                                                                                                                                                                                                                                                                                                                                                                                                                                                                                                                                                                                                                                                                                                                                                                                                                                                                                                                                                                                                                                                                                                                                                                                                                                                                                                                                                                                                  |
| Date Submitted by the Author:   | 28-Nov-2022                                                                                                                                                                                                                                                                                                                                                                                                                                                                                                                                                                                                                                                                                                                                                                                                                                                                                                                                                                                                                                                                                                                                                                                                                                                                                                                                                                                                                                                                                                                                                                                                                                                                                                                                                                                                                                                                                                                                                                                                               |
| Complete List of Authors:       | <p>Foley, Éimear; University of Bristol, MRC Integrative Epidemiology Unit, Population Health Sciences; Bristol Medical School, Centre for Academic Mental Health, Population Health Sciences</p> <p>Griffiths, Sian Lowri; University of Birmingham, Institute for Mental Health and Centre for Human Brain Health</p> <p>Murray, Alexander; University of Birmingham, Institute for Mental Health and Centre for Human Brain Health</p> <p>Rogers, Jack; University of Birmingham, Institute for Mental Health and Centre for Human Brain Health</p> <p>Corsi-Zuelli, Fabiana; University of Birmingham, Institute for Mental Health and Centre for Human Brain Health; University of Sao Paulo, Department of Neuroscience and Behaviour</p> <p>Hickinbotham, Hannah; University of Cambridge, Department of Psychiatry</p> <p>Warwick, Ella; University of Birmingham, Institute for Mental Health and Centre for Human Brain Health</p> <p>Wilson, Martin; University of Birmingham, Institute for Mental Health and Centre for Human Brain Health</p> <p>Kaser, Muzaffer; University of Cambridge, Psychiatry; Cambridgeshire and Peterborough NHS Foundation Trust</p> <p>Murray, Graham K.; University of Cambridge, Psychiatry; Cambridgeshire and Peterborough NHS Foundation Trust</p> <p>Deakin, Bill; The University of Manchester, Faculty of Medicine, Biology and Health</p> <p>Jadon, Deepak; University of Cambridge, Medicine</p> <p>Suckling, John; University of Cambridge, Psychiatry; Cambridgeshire and Peterborough NHS Foundation Trust</p> <p>Barnes, Nicholas ; University of Birmingham, Institute of Clinical Sciences</p> <p>Upthegrove, Rachel; University of Birmingham, Institute for Mental Health and Centre for Human Brain Health; Early Intervention Service, Birmingham Women's and Children's NHS Foundation Trust</p> <p>Khandaker, Golam M.; University of Bristol, MRC Integrative Epidemiology Unit, Population Health Sciences; NIHR Bristol Biomedical Research Centre</p> |
| <b>Primary Subject Heading</b>: | Mental health                                                                                                                                                                                                                                                                                                                                                                                                                                                                                                                                                                                                                                                                                                                                                                                                                                                                                                                                                                                                                                                                                                                                                                                                                                                                                                                                                                                                                                                                                                                                                                                                                                                                                                                                                                                                                                                                                                                                                                                                             |

1  
2  
3  
4  
5  
6  
7  
8  
9  
10  
11  
12  
13  
14  
15  
16  
17  
18  
19  
20  
21  
22  
23  
24  
25  
26  
27  
28  
29  
30  
31  
32  
33  
34  
35  
36  
37  
38  
39  
40  
41  
42  
43  
44  
45  
46  
47  
48  
49  
50  
51  
52  
53  
54  
55  
56  
57  
58  
59  
60

|                            |                                                                                                                                                |
|----------------------------|------------------------------------------------------------------------------------------------------------------------------------------------|
| Secondary Subject Heading: | Immunology (including allergy)                                                                                                                 |
| Keywords:                  | Schizophrenia & psychotic disorders < PSYCHIATRY, IMMUNOLOGY, Clinical trials < THERAPEUTICS, Magnetic resonance imaging < RADIOLOGY & IMAGING |
|                            |                                                                                                                                                |

SCHOLARONE™  
Manuscripts

1  
2  
3 1 **Protocol for the Psychosis Immune Mechanism Stratified Medicine (PIMS) trial: A**  
4  
5 2 **randomised double-blind placebo-controlled trial of single dose tocilizumab in patients**  
6  
7  
8 3 **with psychosis**  
9  
10 4

11  
12 5 Éimear M. Foley<sup>a,b</sup>; Sian Lowri Griffiths<sup>c</sup>; Alexander Murray<sup>c</sup>; Jack Rogers<sup>c</sup>; Fabiana Corsi-  
13  
14 6 Zuelli<sup>c,d,e</sup>; Hannah Hickinbotham<sup>f</sup>; Ella Warwick<sup>c</sup>; Martin Wilson<sup>c</sup>; Muzaffer Kaser<sup>f,g</sup>;  
15  
16 7 Graham K. Murray<sup>f,g</sup>; Bill Deakin<sup>h</sup>; Deepak Jadon<sup>i</sup>; John Suckling<sup>f,g</sup>; Nicholas M. Barnes<sup>e</sup>;  
17  
18 8 Rachel Upthegrove<sup>c,j,†</sup>; and Golam M. Khandaker<sup>a,b,k,l,†,\*</sup>; for the PIMS Collaboration  
19  
20  
21 9

22  
23  
24 10 <sup>a</sup>MRC Integrative Epidemiology Unit, Population Health Sciences, Bristol Medical School,  
25  
26 11 University of Bristol, Bristol, United Kingdom

27  
28 12 <sup>b</sup>Centre for Academic Mental Health, Population Health Sciences, Bristol Medical School,  
29  
30 13 University of Bristol, Bristol, United Kingdom

31  
32 14 <sup>c</sup>Institute for Mental Health and Centre for Human Brain Health, University of Birmingham,  
33  
34 15 Birmingham, United Kingdom

35  
36 16 <sup>d</sup>Department of Neuroscience and Behaviour, Division of Psychiatry, Ribeirão Preto Medical  
37  
38 17 School, University of São Paulo, São Paulo, Brazil

39  
40 18 <sup>e</sup>Institute of Clinical Sciences, College of Medical and Dental Sciences, University of  
41  
42 19 Birmingham, United Kingdom

43  
44 20 <sup>f</sup>Department of Psychiatry, University of Cambridge, United Kingdom

45  
46 21 <sup>g</sup>Cambridgeshire and Peterborough NHS Foundation Trust, United Kingdom

47  
48 22 <sup>h</sup>Faculty of Biology, Medicine and Health, Division of Neuroscience and Experimental  
49  
50 23 Psychology, School of Biological Sciences, University of Manchester, Manchester Academic  
51  
52 24 Health Science Centre, Manchester, United Kingdom

53  
54 25 <sup>i</sup>Department of Medicine, University of Cambridge, United Kingdom  
55  
56  
57  
58  
59  
60

1  
2  
3 26 <sup>j</sup> Early Intervention Service, Birmingham Women's and Children's NHS Foundation Trust  
4

5 27 <sup>k</sup> NIHR Bristol Biomedical Research Centre, Bristol, United Kingdom  
6

7  
8 28 <sup>l</sup> Avon and Wiltshire Mental Health Partnership NHS Trust, Bristol, United Kingdom  
9

10 29  
11

12 30 <sup>†</sup> Joint senior authors  
13

14 31  
15

16  
17 32 \* **Corresponding author and address:** Prof Golam M. Khandaker, MRC Integrative  
18

19 33 Epidemiology Unit, Oakfield House, Oakfield Grove, Clifton, Bristol, BS8 2BN, UK  
20

21 34 Email: [golam.khandaker@bristol.ac.uk](mailto:golam.khandaker@bristol.ac.uk)  
22  
23  
24  
25  
26  
27  
28  
29  
30  
31  
32  
33  
34  
35  
36  
37  
38  
39  
40  
41  
42  
43  
44  
45  
46  
47  
48  
49  
50  
51  
52  
53  
54  
55  
56  
57  
58  
59  
60

## 35 ABSTRACT

36 **Introduction:** Evidence suggests a potentially causal role of interleukin 6 (IL-6), a  
37 pleiotropic cytokine that generally promotes inflammation, in the pathogenesis of psychosis,  
38 but no interventional studies elucidating potential mechanisms in patients with psychosis,  
39 stratified using inflammatory markers, have been conducted. Tocilizumab is a humanised  
40 monoclonal antibody targeting the IL-6 receptor to inhibit IL-6 signalling licensed in the UK  
41 for treatment of rheumatoid arthritis. The primary objective of this study is to test whether IL-  
42 6 contributes to the pathogenesis of psychosis, and to examine potential mechanisms by  
43 which IL-6 affects psychotic symptoms. A secondary objective is to examine characteristics  
44 of inflammation-associated psychosis.

45 **Methods and analysis:** A proof-of-concept study employing a randomised, parallel-group,  
46 double-blind, placebo-controlled design testing the effect of IL-6 inhibition on anhedonia in  
47 patients with psychosis. Approximately 60 participants with diagnosis of schizophrenia and  
48 related psychotic disorders (ICD-10 codes F20, F22, F25, F28, F29) with evidence of low-  
49 grade inflammation (IL-6  $\geq 0.7$ pg/ml) will receive either one intravenous infusion of  
50 tocilizumab (4.0mg/kg; max 800mg) or normal saline. Psychiatric measures and blood  
51 samples will be collected at baseline, and 7-, 14-, and 28-days post-infusion. Cognitive and  
52 neuroimaging data will be collected at baseline and 14 days post-infusion. In addition,  
53 approximately 30 patients with psychosis without evidence of inflammation (IL-6  $< 0.7$ pg/ml)  
54 and 30 matched healthy controls will be recruited to complete identical baseline assessments  
55 to allow for comparison of the characteristic features of inflammation-associated psychosis.

56 **Ethics and dissemination:** The study is sponsored by the University of Bristol and has been  
57 approved by the Cambridge East Research Ethics Committee (reference: 22/EE/0010; IRAS  
58 project ID: 301682). Study findings will be published in peer-review journals. Findings will  
59 be also disseminated by scientific presentation and by other means.

1  
2  
3  
4  
5  
6  
7  
8  
9  
10  
11  
12  
13  
14  
15  
16  
17  
18  
19  
20  
21  
22  
23  
24  
25  
26  
27  
28  
29  
30  
31  
32  
33  
34  
35  
36  
37  
38  
39  
40  
41  
42  
43  
44  
45  
46  
47  
48  
49  
50  
51  
52  
53  
54  
55  
56  
57  
58  
59  
60

60 **Trial registration number:** ISRCTN 23256704

61

62 **KEYWORDS:** Psychotic Disorders; Negative Symptoms; Interleukin 6; Immunotherapy;  
63 Tocilizumab; Clinical Trial.

For peer review only

1  
2  
3 64 ARTICLE SUMMARY  
4  
5

6 65 **Strengths and limitations of this study**  
7

- 8 66 • Adopting a randomised controlled trial (RCT) design and patient selection based on  
9  
10 67 elevated level of IL-6 (in addition to other criteria) will help examine the causal role  
11  
12 68 of IL-6, and the therapeutic potential of targeting IL-6 pathway, in psychosis.  
13  
14  
15 69 • The use of target specific intervention (anti-IL6R monoclonal antibody tocilizumab)  
16  
17 70 will help assess the clinical relevance of IL-6 and related up- and downstream  
18  
19 71 inflammatory cytokines in psychosis.  
20  
21  
22 72 • The use of neuroimaging, cognitive tests, and extensive peripheral blood biomarker  
23  
24 73 exploration before and after tocilizumab treatment to assess potential mechanisms of  
25  
26 74 effect.  
27  
28  
29 75 • One dose of tocilizumab is unlikely to be sufficient to test the efficacy of this drug as  
30  
31 76 potential treatment for psychosis.  
32  
33  
34 77 • Tocilizumab inhibits both anti-inflammatory (classic) and pro-inflammatory (trans)  
35  
36 78 pathways of IL-6 that may have complementary or differential effects relevant to  
37  
38 79 potential therapeutic effects.  
39  
40  
41  
42  
43  
44  
45  
46  
47  
48  
49  
50  
51  
52  
53  
54  
55  
56  
57  
58  
59  
60



1  
2  
3 81 **Word count:** 4,245  
4

5 82 INTRODUCTION  
6

7  
8 83 **Scientific background and study rationale**  
9

10 84 The neuroimmune hypothesis of schizophrenia proposes that mild peripheral immune  
11  
12 85 activation gives rise to an inflammatory response in the brain and neurobiological changes  
13  
14 86 associated with psychotic illness [1–4]. Meta-analytic evidence is clear that circulating  
15  
16 87 concentrations of interleukin 6 (IL-6) and other inflammatory proteins, such as C-reactive  
17  
18 88 protein (CRP), are increased in patients with psychosis, including treatment naïve first  
19  
20 89 episode psychosis (FEP) [5], compared with controls [6–9]. Prospective cohort studies show  
21  
22 90 that these indices of mild immune activation precede the onset of symptoms [10,11].  
23  
24  
25  
26 91 Furthermore, genetic variants known to increase IL-6 concentrations are associated with  
27  
28 92 genetic risk of schizophrenia [12,13]. These Mendelian randomization studies eliminate the  
29  
30 93 possibility that raised IL-6 concentrations are a consequence of environmental exposures  
31  
32 94 associated with schizophrenia, such as obesity and smoking and instead suggest that IL-6 has  
33  
34 95 a causal role in psychosis. Extending this approach using the UK Biobank population, we  
35  
36 96 found that genetically-predicted levels of IL-6 were associated with reduced grey matter  
37  
38 97 primarily in the middle temporal gyrus, a region whose gene expression profile is enriched  
39  
40 98 for IL-6 pathway proteins and for neuropsychiatric disorder ontologies [14]. Moreover,  
41  
42 99 clinical studies report correlations between IL-6 levels and structural brain changes in  
43  
44  
45 100 individuals with schizophrenia [15], with reduced grey matter volume being exaggerated in  
46  
47 101 patients with psychosis and elevated inflammatory cytokines [16]. Though this causal  
48  
49  
50 102 evidence strongly implicates IL-6, only an intervention study in patients can test the causal  
51  
52  
53 103 hypothesis.  
54

55  
56 104 The neuroimmune hypothesis generally assumes that microglia, the brain's resident  
57  
58 105 immune cells, are activated and pathogenic in schizophrenia. This is supported by traditional  
59  
60

1  
2  
3 106 neuropathological studies and initial in-vivo PET imaging studies [17–19], possibly reflecting  
4  
5 107 impaired cellular control of inflammation or oxidative defence. Inflammatory damage may  
6  
7  
8 108 also account for evidence of oxidative stress from MRS glutathione studies [20]. However,  
9  
10 109 whether microglia are the direct target of IL-6 is unclear and it is not certain that IL-6 can  
11  
12 110 cross the blood-brain barrier and/or increase its permeability to circulating inflammatory  
13  
14 111 cells, cytokines, and chemokines [2,21]. Additionally, it is increasingly uncertain whether  
15  
16 112 microglial inflammation, as traditionally understood, occurs in schizophrenia [22,23]. Recent  
17  
18 113 meta-analyses of PET radioligand binding studies report decreased rather than increased  
19  
20 114 radioligand binding to activated microglia [24,25]. This may account for the unexpected lack  
21  
22 115 of therapeutic benefit of the anti-microglial antibiotic, minocycline, in recent large clinical  
23  
24 116 trials [26,27]. Furthermore, large transcriptomic studies in post-mortem brains report no  
25  
26 117 change or reduction in microglial gene expression but increases in astrocytic expression  
27  
28 118 [23,28–32]. It is increasingly understood that both peripheral immune responses and brain  
29  
30 119 glial function are regulated by specialised T cells (Tregs), a subset of which reside in brain  
31  
32 120 parenchyma [33,34]. A novel proposal is that Treg hypofunction accounts for mild peripheral  
33  
34 121 immune disinhibition and dysregulated astroglial-microglial interaction, such that microglia  
35  
36 122 are driven into a developmental, synapse-pruning phenotype while astroglia disrupt  
37  
38 123 neurotransmitter function [33,34]. Importantly, there are bidirectional interactions between  
39  
40 124 IL-6 and Treg function [34]. Crucially, we will measure IL-6 in addition to cellular and  
41  
42 125 molecular markers of immune function and investigate how they correlate with central  
43  
44 126 markers and clinical state.  
45  
46  
47  
48  
49

50  
51 127 Previous attempts testing the inflammatory hypothesis in therapeutic clinical trials  
52  
53 128 have been attempted. However, little evidence of overall efficacy has been found [35]. These  
54  
55 129 trials have generally tested broad spectrum agents, such as non-steroidal anti-inflammatory  
56  
57 130 drugs, with no attempt to stratify patients according to evidence of inflammation. A trial  
58  
59  
60

1  
2  
3 131 using tocilizumab, a humanised monoclonal antibody (mAb) against the IL-6 receptor  
4  
5 132 currently licensed in the UK for treatment of rheumatoid arthritis (RA) and severe  
6  
7 133 coronavirus disease, reported no improvements in any clinical measure in a small sample of  
8  
9  
10 134 36 patients with established schizophrenia [36]. However, as mentioned previously, no  
11  
12 135 stratification by inflammatory markers or any mechanistic immune measures was applied.  
13  
14 136 Low-grade inflammation is associated with poor response to antipsychotic drugs [37], but  
15  
16 137 immunotherapy is unlikely to be relevant for all patients with psychosis. Meta-analysis  
17  
18 138 suggests that evidence of immune activation, defined by elevated CRP levels, is present in a  
19  
20 139 quarter to one third of patients with schizophrenia [38]. A randomised controlled trial of  
21  
22 140 infliximab, an anti-tumour necrosis factor alpha (TNF- $\alpha$ ) mAb, reported that antidepressant  
23  
24 141 response was associated with higher CRP levels at baseline [39], suggesting that patients with  
25  
26 142 evidence of immune activation may be better candidates for immunotherapy trials. As far as  
27  
28 143 we are aware, no previous clinical trial has selected patients with schizophrenia based on  
29  
30 144 evidence of immune activation.

31  
32  
33  
34  
35 145 Selection of patients with particular symptom profiles and/or stage of illness may also  
36  
37 146 be a useful strategy that needs to be employed in immunotherapy trials for schizophrenia. A  
38  
39 147 wide variety of symptoms occur in schizophrenia such as hallucinations, delusions,  
40  
41 148 anhedonia, cognitive dysfunction, and affective symptoms and presentation of these  
42  
43 149 symptoms differ from one individual to another. Some symptoms may be more related to  
44  
45 150 inflammation than others. For instance, meta-analytic data suggests that elevated  
46  
47 151 proinflammatory cytokines are associated with negative psychotic symptomatology [40].  
48  
49 152 Moreover, a recent study from the ALSPAC birth cohort reported that out of 20 positive and  
50  
51 153 negative symptoms, CRP is particularly associated with anhedonia and auditory  
52  
53 154 hallucinations [41]. Lastly, results from work we have completed to date as part of the MRC-  
54  
55 155 funded larger PIMS collaboration (MR/S037675/1), suggest that anhedonia may be a  
56  
57  
58  
59  
60

1  
2  
3 156 promising target in early phases of established psychotic disorder. Anhedonia and  
4  
5 157 amotivation are strongly associated with poor functional outcomes in depression and  
6  
7 158 schizophrenia, and present a formidable barrier to returning to work or building relationships  
8  
9  
10 159 [42,43]. Patients with psychotic disorders also present with cognitive deficits in a range of  
11  
12 160 domains [44]. Available antipsychotic medications have a limited effects on poor cognitive  
13  
14 161 functioning in psychosis [45]. Illness stage may also be of relevance. Meta-analytic data has  
15  
16 162 revealed no differences in IL-6 levels between stable, medicated patients with schizophrenia  
17  
18 163 and controls, although compared with controls, IL-6 levels were similarly elevated in patients  
19  
20 164 with FEP and those with acute relapse [7]. A separate meta-analysis found evidence of  
21  
22 165 elevated blood cytokine levels in acutely and chronically ill patients with schizophrenia [6].  
23  
24 166 Focusing on particular inflammation-related symptoms, such as anhedonia, and/or illness  
25  
26 167 stage may increase the chance of success for immunotherapy trials.  
27  
28  
29  
30  
31  
32

### 33 169 **Proposed study**

34  
35 170 The proposed two-year study is a UK multi-site (Bristol, Birmingham, and Cambridge)  
36  
37 171 proof-of-concept, randomised, parallel-group, double-blind, placebo-controlled trial.  
38  
39  
40  
41

### 42 173 *Study aims and hypotheses*

43  
44 174 The primary aim of this trial is to examine potential mechanisms by which IL-6 affects  
45  
46 175 anhedonia, psychotic symptoms, and cognition. Our primary hypothesis is that inhibition of  
47  
48 176 IL-6 signalling with a single intravenous infusion of anti-IL6R monoclonal antibody,  
49  
50 177 tocilizumab, in individuals with psychosis and elevated IL-6 at baseline will attenuate  
51  
52 178 symptoms of anhedonia and amotivation in patients with psychosis, relative to placebo. This  
53  
54 179 will provide further evidence for a potential causal role of inflammation in psychosis. Our  
55  
56 180 secondary hypothesis is that reduction in peripheral inflammation after tocilizumab infusion  
57  
58  
59  
60

1  
2  
3 181 in patients with psychosis and evidence of inflammation will be associated with central  
4  
5 182 measures of oxidative stress and relevant resting state brain function.  
6  
7

8 183 We will also conduct deep immunophenotyping of peripheral blood mononuclear cell  
9  
10 184 subsets (CD4<sup>+</sup>, CD8<sup>+</sup>, Tregs, natural killer and natural killer-T cells, monocytes, and B cells)  
11  
12 185 to characterise their absolute number, frequency, and function. Our primary mechanistic  
13  
14 186 outcome is the level of IL-6/STAT3 signalling inhibition within both innate and adaptive  
15  
16 187 immune cells using multi-colour flow cytometry with an established optimised pSTAT3  
17  
18 188 phosflow assay. This will help identify the potential cellular impact of peripheral  
19  
20 189 inflammation in psychosis, which is largely unknown. Functional assessment of IL-6/STAT3  
21  
22 190 signalling in immune cell subsets and their response to exogenous IL-6 stimulation will  
23  
24 191 inform abnormal immune response in psychosis and allow measurement of response to  
25  
26 192 tocilizumab at the cellular level.  
27  
28  
29

30 193 A secondary objective is to carry out an observational study to examine clinical and  
31  
32 194 biomarker differences and similarities between patients with psychotic disorder with and  
33  
34 195 without evidence of inflammation and healthy controls (HCs). We hypothesise that  
35  
36 196 individuals with psychotic disorder and evidence of inflammation, compared to those without  
37  
38 197 evidence of inflammation and HCs, will have increased symptoms of anhedonia and  
39  
40 198 amotivation, poorer cognitive functioning, and cellular and brain-based measures of immune  
41  
42 199 dysfunction.  
43  
44  
45

46  
47 200

## 48 49 50 201 METHODS

51  
52 202 This protocol has been prepared in accordance with the Standard Protocol Items:  
53  
54 203 Recommendations for Interventional Trials (SPIRIT) 2013 statement [46]. Please see  
55  
56 204 supplementary eTable 1 for the SPIRIT checklist. The planned start date for the PIMS trial  
57  
58 205 was 1<sup>st</sup> November 2021, however, this was delayed due to the COVID-19 pandemic. We  
59  
60

1  
2  
3 206 began recruiting at our site in Birmingham in November 2022, and we soon expect  
4  
5 207 recruitment to begin at our Bristol and Cambridge sites. The planned end date is 31<sup>st</sup> May  
6  
7  
8 208 2024.  
9

10 209

## 11 210 **Patient and public involvement**

12  
13  
14  
15 211 The study protocol was prepared in collaboration with individuals with lived experience of  
16  
17 212 mental illness who contributed to the development of participant information sheet, consent  
18  
19 213 forms (Appendix I, II, and III), and data collection procedures.  
20  
21

22 214

## 23 215 **Study design and sample**

24  
25  
26 216 See Figure 1 for an overview of study design. Individuals residing in Bristol, Birmingham, or  
27  
28  
29 217 Cambridge in the United Kingdom will be recruited. Approximately 60 participants with  
30  
31 218 psychosis and evidence of inflammation (i.e., IL-6  $\geq 0.7$ pg/ml) will be randomised to receive  
32  
33 219 either one intravenous infusion of tocilizumab (drug) or normal saline (placebo). For the  
34  
35  
36 220 secondary, observational study, we will compare baseline characteristics of the intervention  
37  
38 221 cohort with approximately 30 participants with psychosis without evidence of inflammation  
39  
40 222 (i.e., IL-6  $< 0.7$ pg/ml), and approximately 30 HCs. Participants without evidence of  
41  
42  
43 223 inflammation and controls will not be randomised as they will not receive any intervention.  
44  
45 224 Neuroimaging will only be undertaken by those without MRI contraindications who have  
46  
47 225 given specific informed consent for MRI. Participants not eligible or not consenting for MRI  
48  
49 226 will take part in all other aspects of the study.  
50

51 227

## 52 228 **Intervention**

53  
54  
55  
56 229 Single intravenous infusion of tocilizumab (4.0mg/kg; max 800mg in total) or normal saline  
57  
58  
59 230 given to participants with psychosis and evidence of inflammation. Tocilizumab blocks both  
60

1  
2  
3 231 IL-6 classic and trans-signalling – the latter being responsible for most of the inflammatory  
4  
5 232 effects of IL-6 – providing broad inhibition of IL-6 signalling and a strong test of a casual  
6  
7 233 role for IL-6 in psychosis [47]. Tocilizumab is the first-in-class, humanized monoclonal  
8  
9 234 antibody against the IL-6R, commercially available and licensed in the UK for treatment of  
10  
11 235 RA. Approved dosage of tocilizumab for treatment of RA is 2, 4, or 8mg/kg; max 800mg in  
12  
13 236 total. In RA, a single tocilizumab infusion has shown to improve clinical and laboratory  
14  
15 237 measures within 48 hours, with most noticeable results in one-to-two weeks [48,49]. The  
16  
17 238 follow-up schedule for our study is in keeping with this observation.  
18  
19  
20  
21  
22  
23

#### 24 240 **Eligibility criteria**

25  
26 241 We will recruit participants aged 18-40 years. Patient participants must meet International  
27  
28 242 Classification of Diseases 10<sup>th</sup> Revision (ICD-10) criteria for a diagnosis of schizophrenia  
29  
30 243 and related psychoses (ICD-10 code F20, F22, F25, F28, F29) at the time of eligibility  
31  
32 244 assessment, be within three years of first diagnosis of psychotic disorder, be on a stable  
33  
34 245 treatment regime with no recent (within two weeks) initiation, cessation, or change in class of  
35  
36 246 antipsychotic medication, and have a Positive and Negative Syndrome Scale (PANSS) item  
37  
38 247 score  $\geq 3$  on P1 (delusions), P2 (conceptual disorganisation), P3 (hallucinatory behaviour), or  
39  
40 248 P6 (suspiciousness/persecution). Additionally, patients recruited to the interventional arm  
41  
42 249 will be required to have serum IL-6 levels  $\geq 0.7$ pg/ml and a Temporal Experience of Pleasure  
43  
44 250 Scale (TEPS) anticipatory pleasure score  $\leq 41$  (based on item numbers 1, 3, 7, 11, 12, 14, 15,  
45  
46 251 16, 17, and 8) and consummatory pleasure score  $\leq 36$  (based on item numbers 2, 4, 5, 6, 8, 9,  
47  
48 252 10, and 13). The threshold of serum IL-6  $\geq 0.7$ pg/mL as evidence of inflammation for this  
49  
50 253 particular trial was chosen based on observations from the Personalised Prognostic Tools for  
51  
52 254 Early Psychosis Management (PRONIA) cohort [<https://www.pronia.eu>]. In 192 first-episode  
53  
54 255 psychosis patients included in the PRONIA study, the median value of serum IL-6 was  
55  
56  
57  
58  
59  
60



256 0.49pg/mL (25<sup>th</sup> percentile 0.22pg/mL; 75<sup>th</sup> percentile 1.11pg/mL), and the mean was  
 257 0.79pg/mL (SD  $\pm$  0.84). Based on these observations, we chose the cut-off of 0.7pg/mL for  
 258 patient selection in current trial. Finally, COVID-19 anti-body titre test will be used to  
 259 determine adequate levels of immune response via the following cut-offs (for poor response):  
 260 400IU Roche/700IU Abbot assay.

261 HCs will have no current or lifetime history of psychiatric diagnosis, as determined by  
 262 the Mini-International Neuropsychiatric Interview (MINI). See Table 1 for complete  
 263 inclusion and exclusion criteria. HCs will be matched to patient participants at the group level  
 264 by age and sex.

265  
 266 **Table 1. PIMS Trial inclusion and exclusion criteria.**

| Group            | Inclusion criteria                                                                                                                                                                                                                                                                | Exclusion criteria                                                                                                                                                                                                                                                                                                                                                                                                                                                                                                                                                                                                                                                                                                                                                                                                                                                                                                                                                                                                                                                                                                                                  |
|------------------|-----------------------------------------------------------------------------------------------------------------------------------------------------------------------------------------------------------------------------------------------------------------------------------|-----------------------------------------------------------------------------------------------------------------------------------------------------------------------------------------------------------------------------------------------------------------------------------------------------------------------------------------------------------------------------------------------------------------------------------------------------------------------------------------------------------------------------------------------------------------------------------------------------------------------------------------------------------------------------------------------------------------------------------------------------------------------------------------------------------------------------------------------------------------------------------------------------------------------------------------------------------------------------------------------------------------------------------------------------------------------------------------------------------------------------------------------------|
| All participants | <ul style="list-style-type: none"> <li>- Provide informed consent.</li> <li>- Understand written and spoken English.</li> <li>- Able and willing to consent to blood sampling.</li> <li>- Willing to abstain from strenuous exercise for 72 hours prior to assessment.</li> </ul> | <ul style="list-style-type: none"> <li>- Pregnancy (confirmed by urine pregnancy test) or breast feeding.</li> <li>- Body mass index &gt;35.</li> <li>- Current or lifetime diagnosis of antisocial personality disorder, autism or other neurodevelopmental disorder, major traumatic brain injury.</li> <li>- Currently active diagnosed eating disorder likely to compromise ability to take part.</li> <li>- History of alcohol or substance use disorder (abuse/dependence) within six months prior to eligibility assessment (nicotine and caffeine dependence are not exclusionary).</li> <li>- Current use of medication likely to compromise interpretation of immunological data.</li> <li>- Known active current or history of recurrent bacterial, viral, fungal, mycobacterial, or other opportunistic infections.</li> <li>- Current infection with VZV, TB, Hepatitis B, Hepatitis C, or HIV confirmed by blood test. Chest X-ray will also be performed to assess for TB.</li> <li>- Any major episode of infection requiring hospitalisation or treatment with IV antibiotics within 4 weeks of eligibility assessment.</li> </ul> |



|                                                        |                                                                                                                                                                                                                                                                                                                                                                                                                                                                                                                                                                                                                                                                                                                                                                                                                                                                                     |                                                                                                                                                                                                                                                                                                                                                                                                                                                                                                                                                                                                                                                                                                                                                                                                                                      |
|--------------------------------------------------------|-------------------------------------------------------------------------------------------------------------------------------------------------------------------------------------------------------------------------------------------------------------------------------------------------------------------------------------------------------------------------------------------------------------------------------------------------------------------------------------------------------------------------------------------------------------------------------------------------------------------------------------------------------------------------------------------------------------------------------------------------------------------------------------------------------------------------------------------------------------------------------------|--------------------------------------------------------------------------------------------------------------------------------------------------------------------------------------------------------------------------------------------------------------------------------------------------------------------------------------------------------------------------------------------------------------------------------------------------------------------------------------------------------------------------------------------------------------------------------------------------------------------------------------------------------------------------------------------------------------------------------------------------------------------------------------------------------------------------------------|
|                                                        |                                                                                                                                                                                                                                                                                                                                                                                                                                                                                                                                                                                                                                                                                                                                                                                                                                                                                     | <ul style="list-style-type: none"> <li>- Unstable cardiac, pulmonary, renal, hepatic, endocrine, hematologic, or active infectious disease, including current or prior malignancy.</li> <li>- Diverticulitis, inflammatory bowel disease, or uncontrolled gastric/duodenal ulcer.</li> <li>- Concomitant auto-immune or auto-inflammatory rheumatological disease.</li> <li>- Concomitant treatment with any biologic drugs.</li> <li>- Current and active ischemic heart disease.</li> <li>- Uncontrolled hypertension defined as systolic blood pressure &gt; 170 or diastolic blood pressure &gt; 110.</li> <li>- History of severe allergic or anaphylactic reactions to human, humanized or murine monoclonal antibodies.</li> <li>- No history of chicken pox infection or no history of varicella zoster immunity.</li> </ul> |
| Additional criteria for neuroimaging (optional)        | - Able and willing to consent to MRI scanning                                                                                                                                                                                                                                                                                                                                                                                                                                                                                                                                                                                                                                                                                                                                                                                                                                       | - Contraindications to MRI.                                                                                                                                                                                                                                                                                                                                                                                                                                                                                                                                                                                                                                                                                                                                                                                                          |
| Additional criterion for healthy controls              | - No current or lifetime psychiatric diagnosis.                                                                                                                                                                                                                                                                                                                                                                                                                                                                                                                                                                                                                                                                                                                                                                                                                                     |                                                                                                                                                                                                                                                                                                                                                                                                                                                                                                                                                                                                                                                                                                                                                                                                                                      |
| Additional criteria for all individuals with psychosis | <ul style="list-style-type: none"> <li>- Meet ICD-10 criteria for a diagnosis of schizophrenia and related psychoses (code F20, F22, F25, F28, F29) at the time of eligibility assessment, as determined by the Mini-International Neuropsychiatric Interview.</li> <li>- Be within three years of first diagnosis of psychotic disorder.</li> <li>- On stable treatment regime with no recent (within 2 weeks) initiation, cessation, or change in class of antipsychotic medication.</li> <li>- No indication or other reason for preclusion into research (e.g., significant risk of suicidal behaviour or risk to others) as determined by their clinical team.</li> <li>- Positive and Negative Syndrome Scale item score <math>\geq 3</math> on P1 (delusions), P2 (conceptual disorganisation), P3 (hallucinatory behaviour), OR P6 (suspiciousness/persecution).</li> </ul> |                                                                                                                                                                                                                                                                                                                                                                                                                                                                                                                                                                                                                                                                                                                                                                                                                                      |

|                                                                       |                                                                                                                                                                                                                                                                                                                                                                                                                                                                                                                                                                                    |  |
|-----------------------------------------------------------------------|------------------------------------------------------------------------------------------------------------------------------------------------------------------------------------------------------------------------------------------------------------------------------------------------------------------------------------------------------------------------------------------------------------------------------------------------------------------------------------------------------------------------------------------------------------------------------------|--|
| Additional criteria for intervention group                            | <ul style="list-style-type: none"> <li>- Serum IL-6 level <math>\geq 0.7</math>pg/ml at eligibility and baseline assessment.</li> <li>- Temporal Experience of Pleasure Scale anticipatory pleasure score <math>\leq 41</math> (based upon item numbers 1, 3, 7, 11, 12, 14, 15, 16, 17, and 8) and consummatory pleasure score <math>\leq 36</math> (based upon item numbers 2, 4, 5, 6, 8, 9, 10, and 13).</li> <li>- Evidence of COVID-19 immunity required prior to infusion, confirmed before randomisation using evidence of vaccination and antibody titre test.</li> </ul> |  |
| Additional criterion for patients with psychosis without inflammation | <ul style="list-style-type: none"> <li>- Serum IL-6 level <math>&lt; 0.7</math>pg/ml at eligibility and baseline assessment.</li> </ul>                                                                                                                                                                                                                                                                                                                                                                                                                                            |  |

269

## 270 Study outcomes

271 The primary outcome is anhedonia, defined as anticipatory and consummatory pleasure  
 272 scores, assessed by the TEPS [50] at approximately day 14 post-infusion. The primary  
 273 mechanistic outcome is the level of IL-6/STAT3 signalling inhibition post-tocilizumab  
 274 infusion in both innate and adaptive immune cells using multi-colour flow cytometry and an  
 275 established optimised pSTAT3 phosflow assay. We will also collect data on several  
 276 tertiary/exploratory measures including positive and negative symptoms of psychosis,  
 277 depressive symptoms, fatigue, quality of life and subjective wellbeing, cognitive function  
 278 (psychomotor speed, attention and memory, and executive function), peripheral blood  
 279 inflammatory markers, cortisol, cell expression, including DNA and RNA sequencing,  
 280 functionality, and neuroimaging measures, including functional resting state MRI and MRS  
 281 outcomes (Table 2). Where possible, blood samples will be collected during working hours

282 and time of sampling will be recorded. However, a specified time window will not be given  
 283 to ease burden on patients and to maximise participation.

284  
 285 **Table 2. PIMS trial study measures**

| Domain                     | Tool                                                      | Source                       | Validated Tool | Time of assessment                |
|----------------------------|-----------------------------------------------------------|------------------------------|----------------|-----------------------------------|
| Sociodemographic/lifestyle | Screening questionnaire                                   | Self-report                  |                | Screening                         |
|                            | Medical History Questionnaire                             | Self-report/General practice |                | Eligibility                       |
|                            | Substance Use Questionnaire                               | Self-report                  |                | Eligibility                       |
|                            | Physical Measurements Form                                | Self-report                  |                | Baseline                          |
|                            | Sociodemographic Questionnaire                            | Self-report                  |                | Baseline                          |
| Psychiatric                | The Temporal Experience of Pleasure Scale                 | Self-report                  | ✓              | Eligibility, baseline, follow-ups |
|                            | The Positive and Negative Syndrome Scale                  | Interviewer assessed         | ✓              | Eligibility, baseline, follow-ups |
|                            | The Mini-International Neuropsychiatric Interview         | Interviewer assessed         | ✓              | Eligibility                       |
|                            | Psychiatric History Questionnaire                         | Self-report                  |                | Baseline                          |
|                            | The Scale for the Assessment of Negative Symptoms         | Self-report                  | ✓              | Baseline, follow-ups              |
|                            | The Calgary Depression Scale for Schizophrenia            | Interviewer assessed         | ✓              | Baseline, follow-ups              |
|                            | Multi-dimensional Fatigue Inventory                       | Self-report                  | ✓              | Baseline, follow-ups              |
|                            | European Quality of Life-5 Dimensions Three-Level Version | Self-report                  | ✓              | Baseline, follow-ups              |
| Cognitive                  | Visual Analogue Scale for Subjective Wellbeing            | Self-report                  | ✓              | Baseline, follow-ups              |
|                            | National Adult Reading Test for estimated premorbid IQ    | Interviewer assessed         | ✓              | Baseline, follow-up 2             |

|              |                                                                                                 |                  |   |                       |
|--------------|-------------------------------------------------------------------------------------------------|------------------|---|-----------------------|
|              | CANTAB Reaction Time test                                                                       | Computer task    | ✓ | Baseline, follow-up 2 |
|              | Symbol Coding Test                                                                              | Paper task       | ✓ | Baseline, follow-up 2 |
|              | CANTAB Rapid Visual Information Processing test                                                 | Computer task    | ✓ | Baseline, follow-up 2 |
|              | CANTAB Paired Associates Learning test                                                          | Computer task    | ✓ | Baseline, follow-up 2 |
|              | CANTAB One Touch Stockings of Cambridge test                                                    | Computer task    | ✓ | Baseline, follow-up 2 |
| Biologic     | Inflammatory markers, cardiometabolic markers,IDO activation, white cell phenotyping            | Laboratory tests |   | Baseline, follow-ups  |
| Genetic      | Gene expression/genotyping                                                                      | Blood (RNA, DNA) |   | Baseline, follow-ups  |
| Neuroimaging | MRI Screening Questionnaire                                                                     |                  |   | Baseline, follow-up 2 |
|              | Structural MRI, 1H-MRS measure of glutathione in the prefrontal cortex area, resting state fMRI |                  |   | Baseline, follow-up 2 |

287

## 288 **Sample size and statistical power**

289 We will recruit approximately 60 patients with psychosis. However, currently there are no  
 290 trials of immunotherapies for anhedonia in schizophrenia making accurate power calculation  
 291 difficult. This study is a proof-of-concept experiment designed to test whether inhibition of  
 292 IL-6 signalling leads to changes in psychotic symptoms. It could also inform likely statistical  
 293 power for future trials testing efficacy of the drug as a treatment of schizophrenia, which is  
 294 not the intention of this study. The exact statistical tests and techniques that will be applied to  
 295 the data will depend on the objective of specific analysis and data characteristics (e.g.,

1  
2  
3 296 variable type, distribution). These details will be specified in analysis plans and registered  
4  
5 297 online before participants are unblinded and any data analysis is performed.  
6  
7  
8 298

9  
10 299 **Randomisation and blinding**

11  
12 300 An external agency independent of the study team will arrange random allocation to  
13  
14 301 tocilizumab or normal saline group 1:1, ensuring two groups are comparable regarding  
15  
16 302 anhedonia severity and sex. Randomisation will be stratified by site. Randomising agency  
17  
18 303 will provide the randomisation code to the relevant hospital pharmacy who will dispense  
19  
20 304 tocilizumab or normal saline according to the randomisation schedule. Dispensing  
21  
22 305 pharmacies will keep a log of products dispensed. Infusions will be prepared and  
23  
24 306 administered at clinical research facilities (CRFs). Infusion packs will be prepared by trained  
25  
26 307 staff not part of the core study team, ensuring blinding of treatment allocation. Infusion packs  
27  
28 308 containing drug or placebo will be visually indistinguishable from each other, ensuring that  
29  
30 309 both participants and study team remain blind regarding treatment allocation.  
31  
32  
33  
34  
35

36 310

37  
38 311 **Statistical analysis**

39  
40 312 For randomised participants, an intention-to-treat approach will be taken for data analysis by  
41  
42 313 including all randomised participants in statistical analyses, regardless of the treatment they  
43  
44 314 received (if any). We will compare outcome measures between treatment and placebo groups  
45  
46 315 controlling for baseline scores. This mechanistic experiment will focus on overall pattern of  
47  
48 316 results and their effect sizes rather than *P*-values for individual tests of statistical significance.  
49  
50 317 The secondary mechanistic and observational analysis will compare psychotic symptoms,  
51  
52 318 cognitive function, blood, neuroimaging, and other biomarkers between and across study  
53  
54 319 groups using appropriate statistical tests.  
55  
56  
57  
58  
59 320  
60

## 322 STUDY PROCEDURE

323 An overview of study procedures is presented in Figure 1 and all study measures are detailed  
324 in Table 2. Recruitment will take place in Bristol, Birmingham, and Cambridge and  
325 assessments at University and NHS research facilities.

326

### 327 **Participant identification**

328 Potential participants with psychosis will be identified by NHS Psychosis Early Intervention  
329 (EI) teams. HCs will be recruited through advertisement methods in Birmingham and  
330 Cambridge. Potential participants will complete a screening questionnaire to confirm their  
331 eligibility to participate. If deemed eligible, participants will be invited to an appointment to  
332 complete a full eligibility assessment.

333

### 334 **Eligibility assessment**

335 Assessments will be carried out to establish eligibility and to obtain informed consent.  
336 Patients will complete the MINI to confirm ICD-10 diagnosis of schizophrenia and related  
337 psychoses, the PANSS to confirm the presence of positive symptoms of psychosis, and the  
338 TEPS to confirm eligibility based on anticipatory and consummatory pleasure sum scores. A  
339 blood sample will be collected from patients for serum IL-6 measurement. An MRI screening  
340 questionnaire will be administered to those willing to give informed consent for  
341 neuroimaging.

342

### 343 **Baseline assessment**

344 All participants (60 inflamed psychosis, 30 non-inflamed psychosis, and 30 HCs) will attend  
345 a baseline assessment comprising psychiatric measures, cognitive tasks, blood sampling, and  
346 neuroimaging (optional). This will be the final study contact for patients without evidence of

1  
2  
3 347 inflammation and HCs. Patients with evidence of inflammation will undergo further tests to  
4  
5 348 establish safety/eligibility to receive tocilizumab, including a chest X-ray and blood tests to  
6  
7 349 exclude pregnancy and certain infections, such as TB, HIV, and COVID-19. Eligible  
8  
9  
10 350 participants will be randomised and invited for infusion.  
11

12 351

### 14 352 **Intervention**

16 353 Intravenous infusion of tocilizumab or normal saline will be given continuously over one  
17  
18 354 hour at CRFs in Bristol, Birmingham, and Cambridge by trained clinical staff under the  
19  
20  
21 355 supervision of a designated study doctor. Participants will remain under clinical observation  
22  
23  
24 356 for a further 1-hour period after the end of infusion.  
25

26 357

### 28 358 **Follow-up assessments**

30 359 Follow-up assessments will take place approximately 7-, 14-, and 28-days post-infusion, and  
31  
32  
33 360 will collect similar data to the baseline assessment. Cognitive tasks and neuroimaging  
34  
35 361 (optional) will be administered only on day 14. Around 42 days post-infusion, participants  
36  
37 362 will be contacted by phone to provide a final debrief; at which point they will exit the study.  
38

39 363

## 42 364 **RISK MANAGEMENT**

### 44 365 **Psychosis-related risks**

46 366 All patients will be under the care of a specialist NHS psychosis EI service. Participation will  
47  
48 367 not involve any treatment modifications or significant delays in receiving treatment. If a  
49  
50  
51 368 patient becomes distressed during an assessment, or does not wish to continue for any reason,  
52  
53 369 the researcher will stop the assessment. Participants may withdraw at any time without giving  
54  
55  
56 370 a reason. If there is any concern for the participant's safety, the research team will liaise with  
57  
58 371 participant's GP and/or mental health team as needed.  
59  
60

1  
2  
3 3724  
5 373 **Procedure-related risks**6  
7 374 *Venepuncture*8  
9 375 Blood taking is associated with mild discomfort and other side effects are rare. Efforts will be  
10  
11 376 made to minimise discomfort. Blood taking will be performed by a nurse, doctor, or research  
12  
13 377 team member trained in venepuncture.  
1415  
16 37817  
18 379 *Chest X-ray*19  
20 380 This study will use a typical effective radiation dose of 0.014 mSv; equivalent to 2.5 days of  
21  
22 381 average natural background radiation in the UK. The risk of developing cancer as a  
23  
24 382 consequence of participating in this study is 0.0001%. Only non-pregnant, adult participants  
25  
26 383 will be included.  
27  
28 38429  
30 385 *Neuroimaging*31  
32 386 Discomfort during MRI will be minimised by using mirrors to allow participants to view  
33  
34 387 outside of the machine, providing ear plugs and a panic button, and allowing participants to  
35  
36 388 communicate with the researcher and scan operator throughout. Mild transient vertigo may be  
37  
38 389 experienced when being moved into the MRI machine. Risk of dislodgement or malfunction  
39  
40 390 of medical implants or metallic foreign objects will be minimised by screening participants to  
41  
42 391 ensure no metal is present on or within the body.  
43  
44 39245  
46 393 *IL-6 levels*47  
48 394 Some participants will show evidence of inflammation in the blood ( $IL-6 \geq 0.7\text{pg/ml}$ ). This is  
49  
50 395 not necessarily a cause for concern. In people with FEP, ~50% have serum IL-6 levels  
51  
52 396  $>0.7\text{pg/ml}$ . Reasons for this in the absence of an acute infection or chronic inflammatory  
53  
54  
55  
56  
57  
58  
59  
60



1  
2  
3 397 illness could include obesity, smoking, alcohol use, and lack of exercise, so knowledge of  
4  
5 398 'inflammation status' may prompt participants to adopt a healthier lifestyle. If serum IL-6  
6  
7 399 level is high (i.e., IL-6  $\geq 0.7$ pg/ml) along with elevated CRP ( $>20$ mg/L) without any apparent  
8  
9 400 explanation, such as infection or chronic inflammatory illness, we will inform the  
10  
11 401 participant's GP and the participant will be excluded from the study.  
12  
13  
14

15 402

16  
17 403 *Risk to research staff*18  
19 404 Staff will follow local safety procedures when lone working. No other risks are anticipated.  
20  
21

22 405

23  
24 406 **Safety considerations for infusion and monitoring of adverse reaction**25  
26 407 *Before infusion*27  
28 408 Participants will be selected based on strict inclusion and exclusion criteria. Additionally, we  
29  
30 409 will carry out tests for TB, HIV, VZV antibody, and Hepatitis B and C because, though  
31  
32 410 unlikely after a single dose, tocilizumab could make these infections worse. Female  
33  
34 411 participants of childbearing age will be given a pregnancy test, which must be negative.  
35  
3637 412 Participants who are sexually active will be asked to use at least one form of effective  
38  
39 413 contraception for six weeks post-infusion. Male participants will also be asked not to donate  
40  
41 414 sperm samples for six weeks post-infusion.  
42  
43

44 415

45  
46 416 *During infusion*47  
48 417 Infusions will be given under supervision of a designated study doctor. Participants will be  
49  
50 418 monitored for possible side effects, which will be managed in line with use of tocilizumab for  
51  
52 419 treating patients with RA.  
53  
54

55 420

56  
57 421 *After infusion*  
58  
59  
60

1  
2  
3 422 Participants will remain under observation for one-hour post-infusion. Participants will be  
4  
5 423 advised to seek help if they feel unwell after leaving the assessment centre and will be given  
6  
7 424 an information sheet containing a telephone number their health professionals can call. If  
8  
9 425 necessary, we will unblind the participant and inform their health professional whether they  
10  
11 426 received tocilizumab or normal saline. Adverse reactions will be recorded at each follow-up  
12  
13 427 visit. Additional, safety blood tests will be done at second follow-up (e.g., WBC count, liver  
14  
15 428 function, lipids).  
16  
17  
18  
19  
20

429

## 430 ETHICS AND DISSEMINATION

21  
22  
23 431 The study will be conducted in accordance with the REC, Health Research Authority (HRA),  
24  
25 432 and local Research and Development (R&D) department approvals and guidelines (REC  
26  
27 433 reference: 22/EE/0010). The study team will prepare protocol amendments as required and  
28  
29 434 ethics approval will be sought before implementing any changes to the approved protocol.  
30  
31 435 The ISRCTN Trial Registry and the Research Governance Office will be informed of any  
32  
33 436 amendments to the protocol.  
34  
35  
36  
37

437

### 438 **Consent**

38  
39  
40  
41 439 Informed consent will be obtained prior to eligibility assessments for participation in the  
42  
43 440 study (Appendix I, II, and II). This will include consent to randomise, for contact with their  
44  
45 441 GP to inform them about participation, access GP/psychiatric records to verify medical  
46  
47 442 history to establish eligibility, and to inform the participant's GP any results/outcomes as  
48  
49 443 necessary. Consent for additional tests to establish safety for tocilizumab infusion and for  
50  
51 444 storing biological samples will also be obtained.  
52  
53  
54  
55

445

### 446 **Study management**

60

1  
2  
3 447 The study is sponsored by the University of Bristol. The sponsor, the Chief Investigator  
4  
5 448 (GMK), and the co-Lead (RU) will have overall responsibility for the study. A named  
6  
7 449 principal investigator will take clinical responsibility for study activities at each site. The  
8  
9 450 study does not require the formal arrangement of a steering committee because, according to  
10  
11 451 the HRA, it is not a Clinical Trial of an Investigational Medicinal Product. However, to  
12  
13 452 enhance monitoring of the study, a study management group will be established, comprising  
14  
15 453 academic and clinical experts in psychiatry, rheumatology, neuroscience, and immunology.  
16  
17  
18  
19  
20

454

### 21 455 **Data management and retention of samples**

22  
23 456 All potential participants will be assigned a unique study-specific participant ID number. All  
24  
25 457 data will be subject to good practice as laid down in the Data Protection Act. Each study  
26  
27 458 stage is tracked so that participant's (de-identified) status within the study is known, and  
28  
29 459 assessment and other appointment dates are forecasted. This information is held on a secure,  
30  
31 460 password-protected database. Anonymised data from assessments will be uploaded to a  
32  
33 461 secure, password-protected database using secure web-based data entry systems. Minimal  
34  
35 462 personal data (age, sex) will be indexed by each participant's unique ID number. Blood  
36  
37 463 samples collected in this study may be stored for up to 10 years after the completion for  
38  
39 464 additional research. Stored samples will be coded throughout the sample storage and analysis  
40  
41 465 process and will not be labelled with personal identifiers. Participants may withdraw their  
42  
43 466 consent for their samples to be stored for future research.  
44  
45  
46  
47  
48

467

### 49 50 51 468 **Dissemination plan**

52  
53 469 Study results will be published in peer-review journals and will conform to the guidelines of  
54  
55 470 the International Committee of Medical Journal Editors. Findings will be disseminated at  
56  
57 471 conferences, departmental talks, and via social and traditional media.  
58  
59  
60

1  
2  
3 4724  
5 473 AUTHORS CONTRIBUTIONS

6  
7 474 ÉMF wrote first draft of the PIMS trial protocol and of this manuscript. SLG, MK, GKM,  
8  
9 475 BD, DJ, JS, and NMB contributed to study design and protocol development and revised  
10  
11 476 manuscript drafts. RU contributed to study design and study protocol, and revised manuscript  
12  
13 477 drafts. GMK devised study design and trial protocol, and revised drafts. ÉMF and SLG  
14  
15 478 developed study materials and liaised with REC and HRA regarding approvals. AM, JR,  
16  
17 479 FCZ, HH, EW, and MW contributed to the revision of the manuscript and validation of  
18  
19 480 operating procedures and mechanistic protocols. RU and GMK co-lead the MRC grant that  
20  
21 481 funds the PIMS trial and provide overall supervision and oversight for the project.  
22  
23  
24  
25  
26 482

27  
28 483 FUNDING STATEMENT

29  
30 484 The PIMS trial is funded by a Medical Research Council (MRC) grant to RU and GMK;  
31  
32 485 Grant Ref: MR/S037675/1. ÉMF is supported by an MRC Integrative Epidemiology Unit  
33  
34 486 PhD Studentship. AM is supported by funding from the MRC for doctoral training  
35  
36 487 (MR/2434208). FCZ receives a PhD Fellowship from the São Paulo Research Foundation  
37  
38 488 (2019/13229-2 and 2021/07448-3). HH is supported by the PIMS Trial MRC grant  
39  
40 489 (MR/S037675/1). DJ is supported by the Cambridge Arthritis Research Endeavour and the  
41  
42 490 National Institute for Health Research (NIHR) Cambridge Biomedical Research Centre  
43  
44 491 (BRC-1215-20014). NMB acknowledges funding support from the MRC (MR/R006008/1  
45  
46 492 and MR/N019016/1), Ministry of Defence (702931454), Diabetes UK (20/0006296), NIHR  
47  
48 493 (14/WM/0093), and Innovate UK (84361). RU has grants from MRC, NIHR: Health  
49  
50 494 Technology Assessment, European Commission - Research: The Seventh Framework  
51  
52 495 Programme, and personal fees from Sunovion, outside the submitted work. GMK  
53  
54  
55  
56  
57  
58  
59  
60

1  
2  
3 496 acknowledges funding support from the Wellcome Trust (Grant No. 201486/Z/16/Z). The  
4  
5 497 funders had no role in the design of this study.  
6  
7  
8 498

9  
10 499 COMPETING INTERESTS STATEMENT

11  
12 500 ÉMF, SLG, AM, JR, FCZ, HH, EW, MW, MK, GKM, BD, DJ, JS, RU, and GMK have no  
13  
14 501 conflicts of interest to report. NMB holds shares and is a Director of Celentyx Ltd.  
15  
16

17 502  
18  
19  
20  
21  
22  
23  
24  
25  
26  
27  
28  
29  
30  
31  
32  
33  
34  
35  
36  
37  
38  
39  
40  
41  
42  
43  
44  
45  
46  
47  
48  
49  
50  
51  
52  
53  
54  
55  
56  
57  
58  
59  
60

For peer review only

## 503 REFERENCES

- 504 1 Khandaker GM, Cousins L, Deakin J, *et al.* Inflammation and immunity in schizophrenia: implications for pathophysiology and treatment. *Lancet Psychiatry* 2015;**2**:258–70. doi:10.1016/S2215-0366(14)00122-9
- 507 2 Khandaker GM, Dantzer R. Is there a role for immune-to-brain communication in schizophrenia? *Psychopharmacology* 2016;**233**:1559–73. doi:10.1007/s00213-015-3975-1
- 510 3 Khandaker GM, Dantzer R, Jones PB. Immunopsychiatry: important facts. *Psychol Med* 2017;**47**:2229–37. doi:10.1017/S0033291717000745
- 512 4 Upthegrove R, Khandaker G. Cytokines, Oxidative Stress and Cellular Markers of Inflammation in Schizophrenia. *Current topics in behavioral neurosciences* 2020;**44**:49–66. doi:10.1007/7854\_2018\_88
- 515 5 Upthegrove R, Manzanares-Teson N, Barnes NM. Cytokine function in medication-naive first episode psychosis: a systematic review and meta-analysis. *Schizophr Res* 2014;**155**:101–8. doi:10.1016/j.schres.2014.03.005
- 518 6 Goldsmith DR, Rapaport MH, Miller BJ. A meta-analysis of blood cytokine network alterations in psychiatric patients: comparisons between schizophrenia, bipolar disorder and depression. *Mol Psychiatry* 2016;**21**:1696–709. doi:10.1038/mp.2016.3
- 521 7 Miller BJ, Buckley P, Seabolt W, *et al.* Meta-analysis of cytokine alterations in schizophrenia: clinical status and antipsychotic effects. *Biological psychiatry* 2011;**70**:663–71. doi:10.1016/j.biopsych.2011.04.013
- 524 8 Potvin S, Stip E, Sepehry AA, *et al.* Inflammatory cytokine alterations in schizophrenia: a systematic quantitative review. *Biol Psychiatry* 2008;**63**:801–8. doi:10.1016/j.biopsych.2007.09.024
- 527 9 Wang AK, Miller BJ. Meta-analysis of Cerebrospinal Fluid Cytokine and Tryptophan Catabolite Alterations in Psychiatric Patients: Comparisons Between Schizophrenia, Bipolar Disorder, and Depression. *Schizophr Bull* 2018;**44**:75–83. doi:10.1093/schbul/sbx035
- 531 10 Khandaker GM, Zimbron J, Dalman C, *et al.* Childhood infection and adult schizophrenia: a meta-analysis of population-based studies. *Schizophr Res* 2012;**139**:161–8. doi:10.1016/j.schres.2012.05.023
- 534 11 Khandaker GM, Zimbron J, Lewis G, *et al.* Prenatal maternal infection, neurodevelopment and adult schizophrenia: a systematic review of population-based studies. *Psychol Med* 2013;**43**:239–57. doi:10.1017/S0033291712000736
- 537 12 Khandaker GM, Zammit S, Burgess S, *et al.* Association between a functional interleukin 6 receptor genetic variant and risk of depression and psychosis in a population-based birth cohort. *Brain Behav Immun* 2018;**69**:264–72. doi:10.1016/j.bbi.2017.11.020
- 540 13 Perry BI, Upthegrove R, Kappelmann N, *et al.* Associations of immunological proteins/traits with schizophrenia, major depression and bipolar disorder: A bi-directional

- 1  
2  
3 542 two-sample mendelian randomization study. *Brain, Behavior, and Immunity*  
4 543 2021;**97**:176–85. doi:10.1016/j.bbi.2021.07.009  
5  
6 544 14 Williams JA, Burgess S, Suckling J, *et al.* Inflammation and Brain Structure in  
7 545 Schizophrenia and Other Neuropsychiatric Disorders: A Mendelian Randomization  
8 546 Study. *JAMA Psychiatry* 2022;**79**:498. doi:10.1001/jamapsychiatry.2022.0407  
9  
10 547 15 Kose M, Pariante CM, Dazzan P, *et al.* The Role of Peripheral Inflammation in Clinical  
11 548 Outcome and Brain Imaging Abnormalities in Psychosis: A Systematic Review. *Front*  
12 549 *Psychiatry* 2021;**12**:612471. doi:10.3389/fpsy.2021.612471  
13  
14 550 16 Lesh TA, Careaga M, Rose DR, *et al.* Cytokine alterations in first-episode schizophrenia  
15 551 and bipolar disorder: relationships to brain structure and symptoms. *Journal of*  
16 552 *Neuroinflammation* 2018;**15**:165. doi:10.1186/s12974-018-1197-2  
17  
18 553 17 Trépanier MO, Hopperton KE, Mizrahi R, *et al.* Postmortem evidence of cerebral  
19 554 inflammation in schizophrenia: a systematic review. *Mol Psychiatry* 2016;**21**:1009–26.  
20 555 doi:10.1038/mp.2016.90  
21  
22 556 18 van Kesteren CFMG, Gremmels H, de Witte LD, *et al.* Immune involvement in the  
23 557 pathogenesis of schizophrenia: a meta-analysis on postmortem brain studies. *Transl*  
24 558 *Psychiatry* 2017;**7**:e1075–e1075. doi:10.1038/tp.2017.4  
25  
26 559 19 Marques TR, Ashok AH, Pillinger T, *et al.* Neuroinflammation in schizophrenia: meta-  
27 560 analysis of in vivo microglial imaging studies. *Psychological Medicine* 2019;**49**:2186–96.  
28 561 doi:10.1017/S0033291718003057  
29  
30 562 20 Murray AJ, Rogers JC, Katshu MZUH, *et al.* Oxidative Stress and the Pathophysiology  
31 563 and Symptom Profile of Schizophrenia Spectrum Disorders. *Frontiers in Psychiatry*  
32 564 2021;**12**.<https://www.frontiersin.org/articles/10.3389/fpsy.2021.703452> (accessed 9 Aug  
33 565 2022).  
34  
35 566 21 Upthegrove R. The immune system and schizophrenia: An update for clinicians.  
36 567 *Advances in Psychiatric Treatment* 2014;**20**:83–91. doi:10.1192/apt.bp.113.011452  
37  
38 568 22 Conen S, Gregory CJ, Hinz R, *et al.* Neuroinflammation as measured by positron  
39 569 emission tomography in patients with recent onset and established schizophrenia:  
40 570 implications for immune pathogenesis. *Mol Psychiatry* 2021;**26**:5398–406.  
41 571 doi:10.1038/s41380-020-0829-y  
42  
43 572 23 van Mierlo HC, Schot A, Boks MPM, *et al.* The association between schizophrenia and  
44 573 the immune system: Review of the evidence from unbiased ‘omic-studies.’ *Schizophrenia*  
45 574 *Research* 2020;**217**:114–23. doi:10.1016/j.schres.2019.05.028  
46  
47 575 24 Plavén-Sigray P, Matheson GJ, Collste K, *et al.* Positron Emission Tomography Studies  
48 576 of the Glial Cell Marker Translocator Protein in Patients With Psychosis: A Meta-  
49 577 analysis Using Individual Participant Data. *Biological Psychiatry* 2018;**84**:433–42.  
50 578 doi:10.1016/j.biopsych.2018.02.1171  
51  
52 579 25 Plavén-Sigray P, Matheson GJ, Coughlin JM, *et al.* Meta-analysis of the Glial Marker  
53 580 TSPO in Psychosis Revisited: Reconciling Inconclusive Findings of Patient-Control  
54 581 Differences. *Biol Psychiatry* 2021;**89**:e5–8. doi:10.1016/j.biopsych.2020.05.028



- 1  
2  
3 582 26 Deakin B, Suckling J, Barnes TRE, *et al.* The benefit of minocycline on negative  
4 583 symptoms of schizophrenia in patients with recent-onset psychosis (BeneMin): a  
5 584 randomised, double-blind, placebo-controlled trial. *The Lancet Psychiatry* 2018;**5**:885–  
6 585 94. doi:10.1016/S2215-0366(18)30345-6  
7  
8  
9 586 27 Weiser M, Levi L, Burshtein S, *et al.* The effect of minocycline on symptoms in  
10 587 schizophrenia: Results from a randomized controlled trial. *Schizophrenia Research*  
11 588 2019;**206**:325–32. doi:10.1016/j.schres.2018.10.023  
12  
13 589 28 Ramaker RC, Bowling KM, Lasseigne BN, *et al.* Post-mortem molecular profiling of  
14 590 three psychiatric disorders. *Genome Medicine* 2017;**9**:72. doi:10.1186/s13073-017-0458-  
15 591 5  
16  
17 592 29 González-Peñas J, Costas J, Villamayor MJG, *et al.* Enrichment of rare genetic variants  
18 593 in astrocyte gene enriched co-expression modules altered in postmortem brain samples of  
19 594 schizophrenia. *Neurobiology of Disease* 2019;**121**:305–14.  
20 595 doi:10.1016/j.nbd.2018.10.013  
21  
22  
23 596 30 Gandal MJ, Zhang P, Hadjimichael E, *et al.* Transcriptome-wide isoform-level  
24 597 dysregulation in ASD, schizophrenia, and bipolar disorder. *Science* 2018;**362**:eaat8127.  
25 598 doi:10.1126/science.aat8127  
26  
27  
28 599 31 Gandal MJ, Haney JR, Parikshak NN, *et al.* Shared molecular neuropathology across  
29 600 major psychiatric disorders parallels polygenic overlap. *Science* 2018;**359**:693–7.  
30 601 doi:10.1126/science.aad6469  
31  
32 602 32 Toker L, Mancarci BO, Tripathy S, *et al.* Transcriptomic Evidence for Alterations in  
33 603 Astrocytes and Parvalbumin Interneurons in Subjects With Bipolar Disorder and  
34 604 Schizophrenia. *Biological Psychiatry* 2018;**84**:787–96.  
35 605 doi:10.1016/j.biopsych.2018.07.010  
36  
37  
38 606 33 Corsi-Zuelli F, Deakin B. Impaired regulatory T cell control of astroglial overdrive and  
39 607 microglial pruning in schizophrenia. *Neuroscience & Biobehavioral Reviews*  
40 608 2021;**125**:637–53. doi:10.1016/j.neubiorev.2021.03.004  
41  
42 609 34 Corsi-Zuelli F, Deakin B, de Lima MHF, *et al.* T regulatory cells as a potential  
43 610 therapeutic target in psychosis? Current challenges and future perspectives. *Brain,*  
44 611 *Behavior, & Immunity - Health* 2021;**17**:100330. doi:10.1016/j.bbih.2021.100330  
45  
46  
47 612 35 Jeppesen R, Christensen RHB, Pedersen EMJ, *et al.* Efficacy and safety of anti-  
48 613 inflammatory agents in treatment of psychotic disorders – A comprehensive systematic  
49 614 review and meta-analysis. *Brain, Behavior, and Immunity* 2020;**90**:364–80.  
50 615 doi:10.1016/j.bbi.2020.08.028  
51  
52 616 36 Girgis RR, Ciarleglio A, Choo T, *et al.* A Randomized, Double-Blind, Placebo-  
53 617 Controlled Clinical Trial of Tocilizumab, An Interleukin-6 Receptor Antibody, For  
54 618 Residual Symptoms in Schizophrenia. *Neuropsychopharmacology : official publication*  
55 619 *of the American College of Neuropsychopharmacology* 2018;**43**:1317–23.  
56 620 doi:10.1038/npp.2017.258  
57  
58  
59  
60



- 1  
2  
3 621 37 Mondelli V, Ciufolini S, Belvederi Murri M, *et al.* Cortisol and Inflammatory Biomarkers  
4 622 Predict Poor Treatment Response in First Episode Psychosis. *Schizophrenia bulletin*  
5 623 2015;**41**:1162–70. doi:10.1093/schbul/sbv028  
6  
7  
8 624 38 Miller BJ, Culpepper N, Rapaport MH. C-reactive protein levels in schizophrenia: a  
9 625 review and meta-analysis. *Clinical schizophrenia & related psychoses* 2014;**7**:223–30.  
10 626 doi:10.3371/CSRP.MICU.020813  
11  
12 627 39 Raison CL, Rutherford RE, Woolwine BJ, *et al.* A randomized controlled trial of the  
13 628 tumor necrosis factor antagonist infliximab for treatment-resistant depression: The role of  
14 629 baseline inflammatory biomarkers. *JAMA Psychiatry* 2013;**70**:31–41.  
15 630 doi:10.1001/2013.jamapsychiatry.4  
16  
17  
18 631 40 Dunleavy C, Elsworth RJ, Uptegrove R, *et al.* Inflammation in first-episode psychosis:  
19 632 The contribution of inflammatory biomarkers to the emergence of negative symptoms, a  
20 633 systematic review and meta-analysis. *Acta Psychiatrica Scandinavica* 2022;**146**:6–20.  
21 634 doi:10.1111/acps.13416  
22  
23 635 41 Khandaker GM, Stochl J, Zammit S, *et al.* Association between circulating levels of C-  
24 636 reactive protein and positive and negative symptoms of psychosis in adolescents in a  
25 637 general population birth cohort. *J Psychiatr Res* 2021;**143**:534–42.  
26 638 doi:10.1016/j.jpsychires.2020.11.028  
27  
28  
29 639 42 Edwards CJ, Cella M, Tarrier N, *et al.* Investigating the empirical support for therapeutic  
30 640 targets proposed by the temporal experience of pleasure model in schizophrenia: A  
31 641 systematic review. *Schizophrenia research* 2015;**168**:120–44.  
32 642 doi:10.1016/j.schres.2015.08.013  
33  
34  
35 643 43 Lalousis PA, Schmaal L, Wood SJ, *et al.* Neurobiologically Based Stratification of  
36 644 Recent-Onset Depression and Psychosis: Identification of Two Distinct Transdiagnostic  
37 645 Phenotypes. *Biological Psychiatry* 2022;**S0006322322011568**.  
38 646 doi:10.1016/j.biopsych.2022.03.021  
39  
40 647 44 Fioravanti M, Carlone O, Vitale B, *et al.* A Meta-Analysis of Cognitive Deficits in Adults  
41 648 with a Diagnosis of Schizophrenia. *Neuropsychol Rev* 2005;**15**:73–95.  
42 649 doi:10.1007/s11065-005-6254-9  
43  
44  
45 650 45 Keefe RSE, Bilder RM, Davis SM, *et al.* Neurocognitive Effects of Antipsychotic  
46 651 Medications in Patients With Chronic Schizophrenia in the CATIE Trial. *Archives of*  
47 652 *General Psychiatry* 2007;**64**:633–47. doi:10.1001/archpsyc.64.6.633  
48  
49 653 46 Chan A-W, Tetzlaff JM, Altman DG, *et al.* SPIRIT 2013 Statement: defining standard  
50 654 protocol items for clinical trials. *Rev Panam Salud Publica* 2015;**38**:506–14.  
51  
52 655 47 Calabrese LH, Rose-John S. IL-6 biology: implications for clinical targeting in rheumatic  
53 656 disease. *Nature reviews Rheumatology* 2014;**10**:720–7. doi:10.1038/nrrheum.2014.127  
54  
55  
56 657 48 Choy EHS, Isenberg DA, Garrood T, *et al.* Therapeutic benefit of blocking interleukin-6  
57 658 activity with an anti-interleukin-6 receptor monoclonal antibody in rheumatoid arthritis:  
58 659 a randomized, double-blind, placebo-controlled, dose-escalation trial. *Arthritis and*  
59 660 *rheumatism* 2002;**46**:3143–50. doi:10.1002/art.10623  
60

- 1  
2  
3 661 49 Woo P, Wilkinson N, Prieur A-M, *et al.* Open label phase II trial of single, ascending  
4 662 doses of MRA in Caucasian children with severe systemic juvenile idiopathic arthritis:  
5 663 proof of principle of the efficacy of IL-6 receptor blockade in this type of arthritis and  
6 664 demonstration of prolonged clinical improvement. *Arthritis research & therapy*  
7 665 2005;7:R1281-8. doi:10.1186/ar1826  
8  
9  
10 666 50 Gard DE, Gard MG, Kring AM, *et al.* Anticipatory and consummatory components of the  
11 667 experience of pleasure: A scale development study. *Journal of Research in Personality*  
12 668 2006;40:1086–102. doi:10.1016/j.jrp.2005.11.001  
13

14 669

15  
16 670  
17  
18  
19  
20  
21  
22  
23  
24  
25  
26  
27  
28  
29  
30  
31  
32  
33  
34  
35  
36  
37  
38  
39  
40  
41  
42  
43  
44  
45  
46  
47  
48  
49  
50  
51  
52  
53  
54  
55  
56  
57  
58  
59  
60

For peer review only

1  
2  
3  
4  
5  
6  
7  
8  
9  
10  
11  
12  
13  
14  
15  
16  
17  
18  
19  
20  
21  
22  
23  
24  
25  
26  
27  
28  
29  
30  
31  
32  
33  
34  
35  
36  
37  
38  
39  
40  
41  
42  
43  
44  
45  
46  
47  
48  
49  
50  
51  
52  
53  
54  
55  
56  
57  
58  
59  
60

671 FIGURE LEGEND

672 Figure 1. Overview of study design

For peer review only

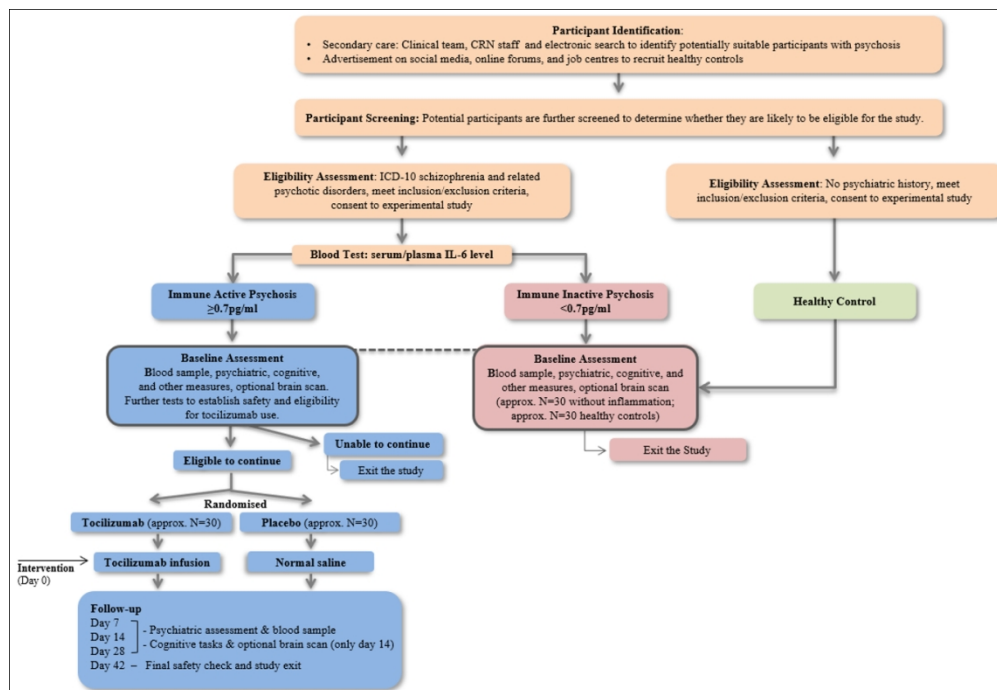

Figure 1. Overview of study design

240x165mm (144 x 144 DPI)

**Supplementary Material**

**Foley et al. Protocol for the Psychosis Immune Mechanism Stratified Medicine (PIMS) trial: A randomised double-blind placebo-controlled trial of single dose tocilizumab in patients with psychosis.**

Table of Contents

eTable1: SPIRIT 2013 Checklist..... 2

Appendix I – Consent Form for Screening: All Participants..... 8

Appendix II – Informed Consent Form for Study Participation: Patients ..... 10

Appendix III – Informed Consent Form for Study Participation: Healthy Controls..... 13

For peer review only

**eTable1:** SPIRIT 2013 Checklist – Recommended items to address in a clinical trial protocol and related documents\*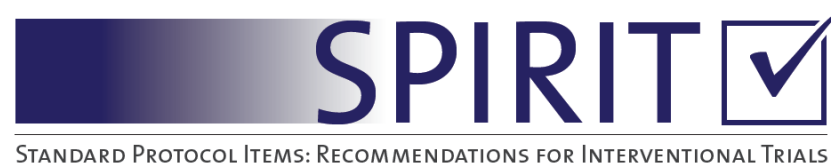

| Section/item                      | Item No | Description                                                                                                                                                                                                                                                                              | Addressed on page number  |
|-----------------------------------|---------|------------------------------------------------------------------------------------------------------------------------------------------------------------------------------------------------------------------------------------------------------------------------------------------|---------------------------|
| <b>Administrative information</b> |         |                                                                                                                                                                                                                                                                                          |                           |
| Title                             | 1       | Descriptive title identifying the study design, population, interventions, and, if applicable, trial acronym                                                                                                                                                                             | 1                         |
| Trial registration                | 2a      | Trial identifier and registry name. If not yet registered, name of intended registry                                                                                                                                                                                                     | 4                         |
|                                   | 2b      | All items from the World Health Organization Trial Registration Data Set                                                                                                                                                                                                                 | 4<br>(ISRCTN<br>23256704) |
| Protocol version                  | 3       | Date and version identifier                                                                                                                                                                                                                                                              | -                         |
| Funding                           | 4       | Sources and types of financial, material, and other support                                                                                                                                                                                                                              | 24 - 25                   |
| Roles and responsibilities        | 5a      | Names, affiliations, and roles of protocol contributors                                                                                                                                                                                                                                  | 1, 24                     |
|                                   | 5b      | Name and contact information for the trial sponsor                                                                                                                                                                                                                                       | 23                        |
|                                   | 5c      | Role of study sponsor and funders, if any, in study design; collection, management, analysis, and interpretation of data; writing of the report; and the decision to submit the report for publication, including whether they will have ultimate authority over any of these activities | 23-25                     |

|    |                                                           |     |                                                                                                                                                                                                                                                                  |                         |
|----|-----------------------------------------------------------|-----|------------------------------------------------------------------------------------------------------------------------------------------------------------------------------------------------------------------------------------------------------------------|-------------------------|
| 1  |                                                           | 5d  | Composition, roles, and responsibilities of the coordinating centre, steering committee, endpoint adjudication committee, data management team, and other individuals or groups overseeing the trial, if applicable (see Item 21a for data monitoring committee) | 23 - 25                 |
| 2  |                                                           |     |                                                                                                                                                                                                                                                                  |                         |
| 3  |                                                           |     |                                                                                                                                                                                                                                                                  |                         |
| 4  |                                                           |     |                                                                                                                                                                                                                                                                  |                         |
| 5  |                                                           |     |                                                                                                                                                                                                                                                                  |                         |
| 6  |                                                           |     |                                                                                                                                                                                                                                                                  |                         |
| 7  |                                                           |     |                                                                                                                                                                                                                                                                  |                         |
| 8  |                                                           |     |                                                                                                                                                                                                                                                                  |                         |
| 9  | <b>Introduction</b>                                       |     |                                                                                                                                                                                                                                                                  |                         |
| 10 |                                                           |     |                                                                                                                                                                                                                                                                  |                         |
| 11 | Background and rationale                                  | 6a  | Description of research question and justification for undertaking the trial, including summary of relevant studies (published and unpublished) examining benefits and harms for each intervention                                                               | 6-9                     |
| 12 |                                                           |     |                                                                                                                                                                                                                                                                  |                         |
| 13 |                                                           | 6b  | Explanation for choice of comparators                                                                                                                                                                                                                            | 6-9                     |
| 14 |                                                           |     |                                                                                                                                                                                                                                                                  |                         |
| 15 | Objectives                                                | 7   | Specific objectives or hypotheses                                                                                                                                                                                                                                | 9-10                    |
| 16 |                                                           |     |                                                                                                                                                                                                                                                                  |                         |
| 17 | Trial design                                              | 8   | Description of trial design including type of trial (eg, parallel group, crossover, factorial, single group), allocation ratio, and framework (eg, superiority, equivalence, noninferiority, exploratory)                                                        | 9                       |
| 18 |                                                           |     |                                                                                                                                                                                                                                                                  |                         |
| 19 |                                                           |     |                                                                                                                                                                                                                                                                  |                         |
| 20 |                                                           |     |                                                                                                                                                                                                                                                                  |                         |
| 21 |                                                           |     |                                                                                                                                                                                                                                                                  |                         |
| 22 | <b>Methods: Participants, interventions, and outcomes</b> |     |                                                                                                                                                                                                                                                                  |                         |
| 23 |                                                           |     |                                                                                                                                                                                                                                                                  |                         |
| 24 | Study setting                                             | 9   | Description of study settings (e.g., community clinic, academic hospital) and list of countries where data will be collected. Reference to where list of study sites can be obtained                                                                             | 9, 11                   |
| 25 |                                                           |     |                                                                                                                                                                                                                                                                  |                         |
| 26 | Eligibility criteria                                      | 10  | Inclusion and exclusion criteria for participants. If applicable, eligibility criteria for study centres and individuals who will perform the interventions (eg, surgeons, psychotherapists)                                                                     | 12, Table 1             |
| 27 |                                                           |     |                                                                                                                                                                                                                                                                  |                         |
| 28 | Interventions                                             | 11a | Interventions for each group with sufficient detail to allow replication, including how and when they will be administered                                                                                                                                       | 11, 19, 21-22, Figure 1 |
| 29 |                                                           |     |                                                                                                                                                                                                                                                                  |                         |
| 30 |                                                           | 11b | Criteria for discontinuing or modifying allocated interventions for a given trial participant (eg, drug dose change in response to harms, participant request, or improving/worsening disease)                                                                   | 22                      |
| 31 |                                                           |     |                                                                                                                                                                                                                                                                  |                         |
| 32 |                                                           | 11c | Strategies to improve adherence to intervention protocols, and any procedures for monitoring adherence (eg, drug tablet return, laboratory tests)                                                                                                                | -                       |
| 33 |                                                           |     |                                                                                                                                                                                                                                                                  |                         |
| 34 |                                                           | 11d | Relevant concomitant care and interventions that are permitted or prohibited during the trial                                                                                                                                                                    | 12, Table 1             |
| 35 |                                                           |     |                                                                                                                                                                                                                                                                  |                         |
| 36 |                                                           |     |                                                                                                                                                                                                                                                                  |                         |
| 37 |                                                           |     |                                                                                                                                                                                                                                                                  |                         |
| 38 |                                                           |     |                                                                                                                                                                                                                                                                  |                         |
| 39 |                                                           |     |                                                                                                                                                                                                                                                                  |                         |
| 40 |                                                           |     |                                                                                                                                                                                                                                                                  |                         |
| 41 |                                                           |     |                                                                                                                                                                                                                                                                  |                         |
| 42 |                                                           |     |                                                                                                                                                                                                                                                                  |                         |

|    |                                                                     |     |                                                                                                                                                                                                                                                                                                                                                                                |                         |
|----|---------------------------------------------------------------------|-----|--------------------------------------------------------------------------------------------------------------------------------------------------------------------------------------------------------------------------------------------------------------------------------------------------------------------------------------------------------------------------------|-------------------------|
| 1  | Outcomes                                                            | 12  | Primary, secondary, and other outcomes, including the specific measurement variable (eg, systolic blood pressure), analysis metric (eg, change from baseline, final value, time to event), method of aggregation (eg, median, proportion), and time point for each outcome. Explanation of the clinical relevance of chosen efficacy and harm outcomes is strongly recommended | 9-10, Figure 1, Table 2 |
| 2  |                                                                     |     |                                                                                                                                                                                                                                                                                                                                                                                |                         |
| 3  |                                                                     |     |                                                                                                                                                                                                                                                                                                                                                                                |                         |
| 4  |                                                                     |     |                                                                                                                                                                                                                                                                                                                                                                                |                         |
| 5  |                                                                     |     |                                                                                                                                                                                                                                                                                                                                                                                |                         |
| 6  | Participant timeline                                                | 13  | Time schedule of enrolment, interventions (including any run-ins and washouts), assessments, and visits for participants. A schematic diagram is highly recommended (see Figure)                                                                                                                                                                                               | 18-19, Figure 1         |
| 7  |                                                                     |     |                                                                                                                                                                                                                                                                                                                                                                                |                         |
| 8  |                                                                     |     |                                                                                                                                                                                                                                                                                                                                                                                |                         |
| 9  | Sample size                                                         | 14  | Estimated number of participants needed to achieve study objectives and how it was determined, including clinical and statistical assumptions supporting any sample size calculations                                                                                                                                                                                          | 17                      |
| 10 |                                                                     |     |                                                                                                                                                                                                                                                                                                                                                                                |                         |
| 11 |                                                                     |     |                                                                                                                                                                                                                                                                                                                                                                                |                         |
| 12 |                                                                     |     |                                                                                                                                                                                                                                                                                                                                                                                |                         |
| 13 | Recruitment                                                         | 15  | Strategies for achieving adequate participant enrolment to reach target sample size                                                                                                                                                                                                                                                                                            | 18                      |
| 14 |                                                                     |     |                                                                                                                                                                                                                                                                                                                                                                                |                         |
| 15 | <b>Methods: Assignment of interventions (for controlled trials)</b> |     |                                                                                                                                                                                                                                                                                                                                                                                |                         |
| 16 | <b>Allocation:</b>                                                  |     |                                                                                                                                                                                                                                                                                                                                                                                |                         |
| 17 |                                                                     |     |                                                                                                                                                                                                                                                                                                                                                                                |                         |
| 18 | Sequence generation                                                 | 16a | Method of generating the allocation sequence (eg, computer-generated random numbers), and list of any factors for stratification. To reduce predictability of a random sequence, details of any planned restriction (eg, blocking) should be provided in a separate document that is unavailable to those who enrol participants or assign interventions                       | 17                      |
| 19 |                                                                     |     |                                                                                                                                                                                                                                                                                                                                                                                |                         |
| 20 |                                                                     |     |                                                                                                                                                                                                                                                                                                                                                                                |                         |
| 21 |                                                                     |     |                                                                                                                                                                                                                                                                                                                                                                                |                         |
| 22 |                                                                     |     |                                                                                                                                                                                                                                                                                                                                                                                |                         |
| 23 |                                                                     |     |                                                                                                                                                                                                                                                                                                                                                                                |                         |
| 24 |                                                                     |     |                                                                                                                                                                                                                                                                                                                                                                                |                         |
| 25 | Allocation concealment mechanism                                    | 16b | Mechanism of implementing the allocation sequence (eg, central telephone; sequentially numbered, opaque, sealed envelopes), describing any steps to conceal the sequence until interventions are assigned                                                                                                                                                                      | 17                      |
| 26 |                                                                     |     |                                                                                                                                                                                                                                                                                                                                                                                |                         |
| 27 |                                                                     |     |                                                                                                                                                                                                                                                                                                                                                                                |                         |
| 28 |                                                                     |     |                                                                                                                                                                                                                                                                                                                                                                                |                         |
| 29 | Implementation                                                      | 16c | Who will generate the allocation sequence, who will enrol participants, and who will assign participants to interventions                                                                                                                                                                                                                                                      | 17                      |
| 30 |                                                                     |     |                                                                                                                                                                                                                                                                                                                                                                                |                         |
| 31 |                                                                     |     |                                                                                                                                                                                                                                                                                                                                                                                |                         |
| 32 |                                                                     |     |                                                                                                                                                                                                                                                                                                                                                                                |                         |
| 33 | Blinding (masking)                                                  | 17a | Who will be blinded after assignment to interventions (eg, trial participants, care providers, outcome assessors, data analysts), and how                                                                                                                                                                                                                                      | 17                      |
| 34 |                                                                     |     |                                                                                                                                                                                                                                                                                                                                                                                |                         |
| 35 |                                                                     |     |                                                                                                                                                                                                                                                                                                                                                                                |                         |
| 36 |                                                                     | 17b | If blinded, circumstances under which unblinding is permissible, and procedure for revealing a participant's allocated intervention during the trial                                                                                                                                                                                                                           | 22                      |
| 37 |                                                                     |     |                                                                                                                                                                                                                                                                                                                                                                                |                         |
| 38 |                                                                     |     |                                                                                                                                                                                                                                                                                                                                                                                |                         |
| 39 |                                                                     |     |                                                                                                                                                                                                                                                                                                                                                                                |                         |
| 40 |                                                                     |     |                                                                                                                                                                                                                                                                                                                                                                                |                         |
| 41 |                                                                     |     |                                                                                                                                                                                                                                                                                                                                                                                |                         |
| 42 |                                                                     |     |                                                                                                                                                                                                                                                                                                                                                                                |                         |
| 43 |                                                                     |     |                                                                                                                                                                                                                                                                                                                                                                                |                         |
| 44 |                                                                     |     |                                                                                                                                                                                                                                                                                                                                                                                |                         |
| 45 |                                                                     |     |                                                                                                                                                                                                                                                                                                                                                                                |                         |
| 46 |                                                                     |     |                                                                                                                                                                                                                                                                                                                                                                                |                         |



1  
2  
3  
4  
5  
6  
7  
8  
9  
10  
11  
12  
13  
14  
15  
16  
17  
18  
19  
20  
21  
22  
23  
24  
25  
26  
27  
28  
29  
30  
31  
32  
33  
34  
35  
36  
37  
38  
39  
40  
41  
42  
43  
44  
45  
46**Methods: Data collection, management, and analysis**

|                            |     |                                                                                                                                                                                                                                                                                                                                                                                                              |                       |
|----------------------------|-----|--------------------------------------------------------------------------------------------------------------------------------------------------------------------------------------------------------------------------------------------------------------------------------------------------------------------------------------------------------------------------------------------------------------|-----------------------|
| Data collection methods    | 18a | Plans for assessment and collection of outcome, baseline, and other trial data, including any related processes to promote data quality (eg, duplicate measurements, training of assessors) and a description of study instruments (eg, questionnaires, laboratory tests) along with their reliability and validity, if known. Reference to where data collection forms can be found, if not in the protocol | 10-15, 18-19, Table 2 |
|                            | 18b | Plans to promote participant retention and complete follow-up, including list of any outcome data to be collected for participants who discontinue or deviate from intervention protocols                                                                                                                                                                                                                    | 17-18                 |
| Data management            | 19  | Plans for data entry, coding, security, and storage, including any related processes to promote data quality (eg, double data entry; range checks for data values). Reference to where details of data management procedures can be found, if not in the protocol                                                                                                                                            | 23-24                 |
| Statistical methods        | 20a | Statistical methods for analysing primary and secondary outcomes. Reference to where other details of the statistical analysis plan can be found, if not in the protocol                                                                                                                                                                                                                                     | 17-18                 |
|                            | 20b | Methods for any additional analyses (eg, subgroup and adjusted analyses)                                                                                                                                                                                                                                                                                                                                     | 17-18                 |
|                            | 20c | Definition of analysis population relating to protocol non-adherence (eg, as randomised analysis), and any statistical methods to handle missing data (eg, multiple imputation)                                                                                                                                                                                                                              | -                     |
| <b>Methods: Monitoring</b> |     |                                                                                                                                                                                                                                                                                                                                                                                                              |                       |
| Data monitoring            | 21a | Composition of data monitoring committee (DMC); summary of its role and reporting structure; statement of whether it is independent from the sponsor and competing interests; and reference to where further details about its charter can be found, if not in the protocol. Alternatively, an explanation of why a DMC is not needed                                                                        | 23                    |
|                            | 21b | Description of any interim analyses and stopping guidelines, including who will have access to these interim results and make the final decision to terminate the trial                                                                                                                                                                                                                                      | -                     |
| Harms                      | 22  | Plans for collecting, assessing, reporting, and managing solicited and spontaneously reported adverse events and other unintended effects of trial interventions or trial conduct                                                                                                                                                                                                                            | 20-22                 |

|    |                                 |     |                                                                                                                                                                                                                                                                                     |       |
|----|---------------------------------|-----|-------------------------------------------------------------------------------------------------------------------------------------------------------------------------------------------------------------------------------------------------------------------------------------|-------|
| 1  | Auditing                        | 23  | Frequency and procedures for auditing trial conduct, if any, and whether the process will be independent from investigators and the sponsor                                                                                                                                         | -     |
| 2  |                                 |     |                                                                                                                                                                                                                                                                                     |       |
| 3  |                                 |     |                                                                                                                                                                                                                                                                                     |       |
| 4  | <b>Ethics and dissemination</b> |     |                                                                                                                                                                                                                                                                                     |       |
| 5  |                                 |     |                                                                                                                                                                                                                                                                                     |       |
| 6  | Research ethics approval        | 24  | Plans for seeking research ethics committee/institutional review board (REC/IRB) approval                                                                                                                                                                                           | 22    |
| 7  |                                 |     |                                                                                                                                                                                                                                                                                     |       |
| 8  |                                 |     |                                                                                                                                                                                                                                                                                     |       |
| 9  | Protocol amendments             | 25  | Plans for communicating important protocol modifications (eg, changes to eligibility criteria, outcomes, analyses) to relevant parties (eg, investigators, REC/IRBs, trial participants, trial registries, journals, regulators)                                                    | 22    |
| 10 |                                 |     |                                                                                                                                                                                                                                                                                     |       |
| 11 |                                 |     |                                                                                                                                                                                                                                                                                     |       |
| 12 |                                 |     |                                                                                                                                                                                                                                                                                     |       |
| 13 |                                 |     |                                                                                                                                                                                                                                                                                     |       |
| 14 | Consent or assent               | 26a | Who will obtain informed consent or assent from potential trial participants or authorised surrogates, and how (see Item 32)                                                                                                                                                        | 22-23 |
| 15 |                                 |     |                                                                                                                                                                                                                                                                                     |       |
| 16 |                                 |     |                                                                                                                                                                                                                                                                                     |       |
| 17 |                                 | 26b | Additional consent provisions for collection and use of participant data and biological specimens in ancillary studies, if applicable                                                                                                                                               | 22-23 |
| 18 |                                 |     |                                                                                                                                                                                                                                                                                     |       |
| 19 |                                 |     |                                                                                                                                                                                                                                                                                     |       |
| 20 | Confidentiality                 | 27  | How personal information about potential and enrolled participants will be collected, shared, and maintained in order to protect confidentiality before, during, and after the trial                                                                                                | 23-24 |
| 21 |                                 |     |                                                                                                                                                                                                                                                                                     |       |
| 22 |                                 |     |                                                                                                                                                                                                                                                                                     |       |
| 23 |                                 |     |                                                                                                                                                                                                                                                                                     |       |
| 24 | Declaration of interests        | 28  | Financial and other competing interests for principal investigators for the overall trial and each study site                                                                                                                                                                       | 25    |
| 25 |                                 |     |                                                                                                                                                                                                                                                                                     |       |
| 26 |                                 |     |                                                                                                                                                                                                                                                                                     |       |
| 27 | Access to data                  | 29  | Statement of who will have access to the final trial dataset, and disclosure of contractual agreements that limit such access for investigators                                                                                                                                     | 23    |
| 28 |                                 |     |                                                                                                                                                                                                                                                                                     |       |
| 29 |                                 |     |                                                                                                                                                                                                                                                                                     |       |
| 30 | Ancillary and post-trial care   | 30  | Provisions, if any, for ancillary and post-trial care, and for compensation to those who suffer harm from trial participation                                                                                                                                                       | 22    |
| 31 |                                 |     |                                                                                                                                                                                                                                                                                     |       |
| 32 |                                 |     |                                                                                                                                                                                                                                                                                     |       |
| 33 | Dissemination policy            | 31a | Plans for investigators and sponsor to communicate trial results to participants, healthcare professionals, the public, and other relevant groups (eg, via publication, reporting in results databases, or other data sharing arrangements), including any publication restrictions | 24    |
| 34 |                                 |     |                                                                                                                                                                                                                                                                                     |       |
| 35 |                                 |     |                                                                                                                                                                                                                                                                                     |       |
| 36 |                                 |     |                                                                                                                                                                                                                                                                                     |       |
| 37 |                                 |     |                                                                                                                                                                                                                                                                                     |       |
| 38 |                                 | 31b | Authorship eligibility guidelines and any intended use of professional writers                                                                                                                                                                                                      | 24    |
| 39 |                                 |     |                                                                                                                                                                                                                                                                                     |       |
| 40 |                                 | 31c | Plans, if any, for granting public access to the full protocol, participant-level dataset, and statistical code                                                                                                                                                                     | -     |
| 41 |                                 |     |                                                                                                                                                                                                                                                                                     |       |
| 42 |                                 |     |                                                                                                                                                                                                                                                                                     |       |

|                            |    |                                                                                                                                                                                                |                        |
|----------------------------|----|------------------------------------------------------------------------------------------------------------------------------------------------------------------------------------------------|------------------------|
| <b>Appendices</b>          |    |                                                                                                                                                                                                |                        |
| Informed consent materials | 32 | Model consent form and other related documentation given to participants and authorised surrogates                                                                                             | Appendix I, II and III |
| Biological specimens       | 33 | Plans for collection, laboratory evaluation, and storage of biological specimens for genetic or molecular analysis in the current trial and for future use in ancillary studies, if applicable | 23-24                  |

\*It is strongly recommended that this checklist be read in conjunction with the SPIRIT 2013 Explanation & Elaboration for important clarification on the items. Amendments to the protocol should be tracked and dated. The SPIRIT checklist is copyrighted by the SPIRIT Group under the Creative Commons [“Attribution-NonCommercial-NoDerivs 3.0 Unported”](https://creativecommons.org/licenses/by-nc-nd/3.0/) license.

## Appendix I – Consent Form for Screening: All Participants

### Informed Consent Form for Screening

REC No. 22/EE/0010, Date: 08.02.2022, Version: 1.2

### Psychosis Immune Mechanism Stratified Medicine Trial: The PIMS Trial

**PARTICIPANT ID:** \_\_\_\_\_

Thank you for considering taking part in the PIMS Trial. The research team must explain the eligibility assessment of the study to you before you agree to take part. If you have any questions arising from the Participant Information Sheet or from the explanation already given to you, please ask a member of the research team before you decide to participate. You will be given a copy of this Informed Consent Form to keep for future reference.

**Please read the statements below and insert your initial in the box next to each statement if you agree with them:**

| Statement                                                                                                                                                                                                                                                                                                                                                                | Initial Here |    |
|--------------------------------------------------------------------------------------------------------------------------------------------------------------------------------------------------------------------------------------------------------------------------------------------------------------------------------------------------------------------------|--------------|----|
| 1. I have read and understood the information sheet version XX, DD.MM.YYYY and have had the opportunity to ask questions.                                                                                                                                                                                                                                                |              |    |
| 2. I understand that my participation is voluntary and I am free to withdraw at any time without giving a reason, without my current or future medical care or legal rights being affected.                                                                                                                                                                              |              |    |
| 3. I agree to provide blood samples for eligibility screening. I understand my blood samples will be analysed to test for evidence of immune activation. The purposes and possible risks of donating these samples have been explained to me. I understand that donated samples will be considered a gift but I will have the right to withdraw permission for analysis. |              |    |
| 4. I agree that my GP can be told that I am participating in the eligibility assessment of the PIMS Trial, and can be informed if any unexpected results are found pertaining specifically to my health.                                                                                                                                                                 |              |    |
| 5. I consent for my GP/Psychiatrist to share information from my medical record in order to confirm my eligibility to take part in this study. The study team may access my GP/Psychiatrist records if necessary.                                                                                                                                                        |              |    |
| <i>Optional (Not agreeing to these will not exclude you from this study). Please tick Yes / No (as appropriate)</i>                                                                                                                                                                                                                                                      | Yes          | No |
| 6. I agree that the samples can be stored after completion of the screening analysis, for use in future, ethically approved, non-genetic studies, even if I am deemed non-eligible to partake in the PIMS study.                                                                                                                                                         |              |    |
| 7. I agree that data and samples can be stored after completion of the PIMS Trial for use in future, ethically approved, genetic studies. This includes the main stocks of any genetic material collected, such as DNA and RNA.                                                                                                                                          |              |    |

**If you want to participate in the screening session of the PIMS Trial, please sign your name below:**

Participant Signature \_\_\_\_\_

Participant Full Name \_\_\_\_\_

1  
2  
3  
4  
5 Date \_\_\_\_ / \_\_\_\_ / \_\_\_\_  
6  
7  
8  
9

10  
11 **The researcher who has explained this study to you also needs to sign this form:**  
12  
13

14  
15 Staff Signature \_\_\_\_\_  
16

17  
18 Staff Full Name \_\_\_\_\_  
19

20  
21 Date \_\_\_\_ / \_\_\_\_ / \_\_\_\_  
22  
23

24 **Thank you for your help.**  
25

26 By completing and returning this form, you are giving us your consent that the personal  
27 information you provide will be treated as strictly confidential and handled in accordance with  
28 the provisions of the UK Data Protection Act 2018.  
29

30 *\*When completed: 1 for participant; and 1 for researcher site file.*  
31  
32  
33  
34  
35  
36  
37  
38  
39  
40  
41  
42  
43  
44  
45  
46  
47  
48  
49  
50  
51  
52  
53  
54  
55  
56  
57  
58  
59  
60

## Appendix II – Informed Consent Form for Study Participation: Patients

### Informed Consent Form for Study Participation

REC No. 22/EE/0010, Date: 24.08.2022, Version: 1.5

### Psychosis Immune Mechanism Stratified Medicine Trial: The PIMS Trial

**PARTICIPANT ID:** \_\_\_\_\_

Thank you for taking part in the PIMS Trial eligibility assessment. Based on this assessment, you are eligible to take part in the PIMS Trial. Before you agree to take part, the research team must explain the study to you. If you have any questions arising from the Participant Information Sheet or from the explanation already given to you, please ask a member of the research team before you decide to participate. You will be given a copy of this Informed Consent Form to keep for future reference.

**Please read the statements below and insert your initial in the box next to each statement if you agree with them:**

| Statement                                                                                                                                                                                                                                                                                                                                                                                               | Initial Here |
|---------------------------------------------------------------------------------------------------------------------------------------------------------------------------------------------------------------------------------------------------------------------------------------------------------------------------------------------------------------------------------------------------------|--------------|
| 1. I have read and understood the information sheet version XX dated DD.MM.YYYY and have had the opportunity to ask questions.                                                                                                                                                                                                                                                                          |              |
| 2. I agree to take part in the PIMS Trial. I understand that my participation is voluntary and I am free to withdraw at any time without giving a reason, without my current or future medical care or legal rights being affected.                                                                                                                                                                     |              |
| 3. I understand that confidentiality and anonymity will be maintained and it will not be possible to identify me in any publications.                                                                                                                                                                                                                                                                   |              |
| 4. I agree to partake in interviews, complete questionnaires, and cognitive tests as part of this study. I understand what will happen during the study assessments.                                                                                                                                                                                                                                    |              |
| 5. I agree to provide blood samples. The purposes and possible risks of donating these samples have been explained to me. I understand that donated samples will be considered a gift but I will have the right to withdraw permission for analysis.                                                                                                                                                    |              |
| 6. I understand that blood samples collected from me will be used to measure non-genetic factors such as biochemical changes in the blood.                                                                                                                                                                                                                                                              |              |
| 7. I agree that the samples and information I provide can be stored, used and shared between PIMS Trial sites and with collaborators/contractors for the purpose of the study.                                                                                                                                                                                                                          |              |
| 8. I understand that blood samples collected will be stored at PIMS Trial centres.                                                                                                                                                                                                                                                                                                                      |              |
| 9. I understand that any of my samples (labelled with an anonymous ID only), or any information obtained from them, including the sequence of my genetic material, may be sent to specialist research laboratories in the UK and abroad for analyses and the results returned to PIMS Trial centres. Researchers at these laboratories have no access to personal information about study participants. |              |
| 10. I agree, if necessary, to provide blood/urine samples to test for pregnancy, COVID-19 immunity, Hepatitis B, Hepatitis C, HIV, VZV and Tuberculosis, and to undergo a chest X ray.                                                                                                                                                                                                                  |              |
| 11. I agree to being randomised into the tocilizumab or placebo group if deemed eligible to take part.                                                                                                                                                                                                                                                                                                  |              |

|                                                                                                                                                                                                                                                                                                                                        |     |    |
|----------------------------------------------------------------------------------------------------------------------------------------------------------------------------------------------------------------------------------------------------------------------------------------------------------------------------------------|-----|----|
| 12. I understand that taking part will involve the administration of a single intravenous infusion of the anti-inflammatory drug tocilizumab or normal saline.                                                                                                                                                                         |     |    |
| 13. I agree that my GP can be told that I am participating in this study, and about any findings that require further attention.                                                                                                                                                                                                       |     |    |
| 14. I understand that information related to my participation in this study may be accessed by responsible individuals from the sponsors of this study for quality control purposes. I give permission for these individuals to have access to this data.                                                                              |     |    |
| 15. I understand that relevant sections of my medical notes and data collected during the study, may be looked at by individuals from research team, from regulatory authorities or from the NHS Trust, where it is relevant to my taking part in this research. I give permission for these individuals to have access to my records. |     |    |
| <i>Optional (Not agreeing to these will not exclude you from this study). Please tick Yes / No (as appropriate)</i>                                                                                                                                                                                                                    | Yes | No |
| 16. I agree to undergo brain scans as part of the PIMS Trial.                                                                                                                                                                                                                                                                          |     |    |
| 17. I agree to be contacted in future by researchers to participate in follow up studies to this project, or in future studies of a similar nature.                                                                                                                                                                                    |     |    |
| 18. I understand that researchers may use the blood samples for genetic analysis.                                                                                                                                                                                                                                                      |     |    |
| 19. I agree that the samples can be stored after completion of the PIMS Trial for use in future, ethically approved, non-genetic studies.                                                                                                                                                                                              |     |    |
| 20. I agree that the information I give can be stored after completion of the PIMS Trial for use in future, ethically approved, non-genetic studies.                                                                                                                                                                                   |     |    |
| 21. I agree that data and samples can be stored after completion of the PIMS Trial for use in future, ethically approved, genetic studies. This includes the main stocks of any genetic material collected, such as DNA and RNA.                                                                                                       |     |    |

**If you want to participate in the PIMS Trial, please sign your name below:**

Participant Signature \_\_\_\_\_

Participant Full Name \_\_\_\_\_

Date \_\_\_\_/\_\_\_\_/\_\_\_\_

**Research staff who has explained this study to you also needs to sign this form:**

Staff Signature \_\_\_\_\_

Staff Full Name \_\_\_\_\_

Date \_\_\_\_/\_\_\_\_/\_\_\_\_

1  
2  
3  
4  
5 **Thank you for your help.**  
6

7 By completing and returning this form, you are giving us your consent that the personal  
8 information you provide will be treated as strictly confidential and handled in accordance with  
9 the provisions of the UK Data Protection Act 2018.  
10

11 *\*When completed: 1 for participant; and 1 for researcher site file.*  
12  
13  
14  
15  
16  
17  
18  
19  
20  
21  
22  
23  
24  
25  
26  
27  
28  
29  
30  
31  
32  
33  
34  
35  
36  
37  
38  
39  
40  
41  
42  
43  
44  
45  
46  
47  
48  
49  
50  
51  
52  
53  
54  
55  
56  
57  
58  
59  
60

For peer review only



## Appendix III – Informed Consent Form for Study Participation: Healthy Controls

### Healthy Controls Informed Consent Form for Study Participation

REC No. 22/EE/0010, Date: 17.02.2022, Version: 1

### Psychosis Immune Mechanism Stratified Medicine Trial: The PIMS Trial

**PARTICIPANT ID:** \_\_\_\_\_

Thank you for taking part in the PIMS Trial eligibility assessment. Based on this assessment, you are eligible to take part in the PIMS Trial. Before you agree to take part, the research team must explain the study to you. If you have any questions arising from the Participant Information Sheet or from the explanation already given to you, please ask a member of the research team before you decide to participate. You will be given a copy of this Informed Consent Form to keep for future reference.

**Please read the statements below and insert your initial in the box next to each statement if you agree with them:**

| Statement                                                                                                                                                                                                                                                                                                                                                                                               | Initial Here |    |
|---------------------------------------------------------------------------------------------------------------------------------------------------------------------------------------------------------------------------------------------------------------------------------------------------------------------------------------------------------------------------------------------------------|--------------|----|
| 1. I have read and understood the information sheet version XX dated DD.MM.YYYY and have had the opportunity to ask questions.                                                                                                                                                                                                                                                                          |              |    |
| 2. I agree to take part in the PIMS Trial. I understand that my participation is voluntary, and I am free to withdraw at any time without giving a reason, without my current or future medical care or legal rights being affected.                                                                                                                                                                    |              |    |
| 3. I understand that confidentiality and anonymity will be maintained, and it will not be possible to identify me in any publications.                                                                                                                                                                                                                                                                  |              |    |
| 4. I agree to partake in interviews, complete questionnaires, and cognitive tests as part of this study. I understand what will happen during the study assessments.                                                                                                                                                                                                                                    |              |    |
| 5. I agree to provide blood samples. The purposes and possible risks of donating these samples have been explained to me. I understand that donated samples will be considered a gift, but I will have the right to withdraw permission for analysis.                                                                                                                                                   |              |    |
| 6. I understand that my blood samples collected will be stored at PIMS Trial centres.                                                                                                                                                                                                                                                                                                                   |              |    |
| 7. I understand that blood samples collected from me will be used to measure non-genetic factors such as biochemical changes in the blood.                                                                                                                                                                                                                                                              |              |    |
| 8. I understand that any of my samples (labelled with an anonymous ID only), or any information obtained from them, including the sequence of my genetic material, may be sent to specialist research laboratories in the UK and abroad for analyses and the results returned to PIMS Trial centres. Researchers at these laboratories have no access to personal information about study participants. |              |    |
| 9. I agree that the samples and information I provide can be stored, used and shared between PIMS Trial sites and with collaborators/contractors for the purpose of the study.                                                                                                                                                                                                                          |              |    |
| 10. I understand that information related to my participation in this study may be accessed by responsible individuals from the sponsors of this study for quality control purposes. I give permission for these individuals to have access to this data.                                                                                                                                               |              |    |
| <i>Optional (Not agreeing to these will not exclude you from this study). Please tick Yes / No (as appropriate)</i>                                                                                                                                                                                                                                                                                     | Yes          | No |

|                                                                                                                                                                                                                                  |  |  |
|----------------------------------------------------------------------------------------------------------------------------------------------------------------------------------------------------------------------------------|--|--|
| 11. I agree to undergo brain scans as part of the PIMS Trial.                                                                                                                                                                    |  |  |
| 12. I agree to be contacted in future by researchers to participate in follow up studies to this project, or in future studies of a similar nature.                                                                              |  |  |
| 13. I understand that researchers may use the blood samples for genetic analysis.                                                                                                                                                |  |  |
| 14. I agree that the samples can be stored after completion of the PIMS Trial for use in future, ethically approved, non-genetic studies.                                                                                        |  |  |
| 15. I agree that the information I give can be stored after completion of the PIMS Trial for use in future, ethically approved, non-genetic studies.                                                                             |  |  |
| 16. I agree that data and samples can be stored after completion of the PIMS Trial for use in future, ethically approved, genetic studies. This includes the main stocks of any genetic material collected, such as DNA and RNA. |  |  |

**If you want to participate in the PIMS Trial, please sign your name below:**

Participant Signature \_\_\_\_\_

Participant Full Name \_\_\_\_\_

Date \_\_\_\_ / \_\_\_\_ / \_\_\_\_\_

**Research staff who has explained this study to you also needs to sign this form:**

Staff Signature \_\_\_\_\_

Staff Full Name \_\_\_\_\_

Date \_\_\_\_ / \_\_\_\_ / \_\_\_\_\_

**Thank you for your help.**

By completing and returning this form, you are giving us your consent that the personal information you provide will be treated as strictly confidential and handled in accordance with the provisions of the UK Data Protection Act 2018.

*\*When completed: 1 for participant; and 1 for researcher site file.*

# BMJ Open

## Protocol for the Psychosis Immune Mechanism Stratified Medicine (PIMS) trial: A randomised double-blind placebo-controlled trial of single dose tocilizumab in patients with psychosis

|                                 |                                                                                                                                                                                                                                                                                                                                                                                                                                                                                                                                                                                                                                                                                                                                                                                                                                                                                                                                                                                                                                                                                                                                                                                                                                                                                                                                                                                                                                                                                                                                                                                                                                                                                                                                                                                                                                                                                                                                                                                                                          |
|---------------------------------|--------------------------------------------------------------------------------------------------------------------------------------------------------------------------------------------------------------------------------------------------------------------------------------------------------------------------------------------------------------------------------------------------------------------------------------------------------------------------------------------------------------------------------------------------------------------------------------------------------------------------------------------------------------------------------------------------------------------------------------------------------------------------------------------------------------------------------------------------------------------------------------------------------------------------------------------------------------------------------------------------------------------------------------------------------------------------------------------------------------------------------------------------------------------------------------------------------------------------------------------------------------------------------------------------------------------------------------------------------------------------------------------------------------------------------------------------------------------------------------------------------------------------------------------------------------------------------------------------------------------------------------------------------------------------------------------------------------------------------------------------------------------------------------------------------------------------------------------------------------------------------------------------------------------------------------------------------------------------------------------------------------------------|
| Journal:                        | <i>BMJ Open</i>                                                                                                                                                                                                                                                                                                                                                                                                                                                                                                                                                                                                                                                                                                                                                                                                                                                                                                                                                                                                                                                                                                                                                                                                                                                                                                                                                                                                                                                                                                                                                                                                                                                                                                                                                                                                                                                                                                                                                                                                          |
| Manuscript ID                   | bmjopen-2022-067944.R2                                                                                                                                                                                                                                                                                                                                                                                                                                                                                                                                                                                                                                                                                                                                                                                                                                                                                                                                                                                                                                                                                                                                                                                                                                                                                                                                                                                                                                                                                                                                                                                                                                                                                                                                                                                                                                                                                                                                                                                                   |
| Article Type:                   | Protocol                                                                                                                                                                                                                                                                                                                                                                                                                                                                                                                                                                                                                                                                                                                                                                                                                                                                                                                                                                                                                                                                                                                                                                                                                                                                                                                                                                                                                                                                                                                                                                                                                                                                                                                                                                                                                                                                                                                                                                                                                 |
| Date Submitted by the Author:   | 25-Jan-2023                                                                                                                                                                                                                                                                                                                                                                                                                                                                                                                                                                                                                                                                                                                                                                                                                                                                                                                                                                                                                                                                                                                                                                                                                                                                                                                                                                                                                                                                                                                                                                                                                                                                                                                                                                                                                                                                                                                                                                                                              |
| Complete List of Authors:       | <p>Foley, Éimear; University of Bristol, MRC Integrative Epidemiology Unit, Population Health Sciences; Bristol Medical School, Centre for Academic Mental Health, Population Health Sciences</p> <p>Griffiths, Sian Lowri; University of Birmingham, Institute for Mental Health and Centre for Human Brain Health</p> <p>Murray, Alexander; University of Birmingham, Institute for Mental Health and Centre for Human Brain Health</p> <p>Rogers, Jack; University of Birmingham, Institute for Mental Health and Centre for Human Brain Health</p> <p>Corsi-Zuelli, Fabiana; University of Birmingham, Institute for Mental Health and Centre for Human Brain Health; University of Sao Paulo, Department of Neuroscience and Behaviour</p> <p>Hickinbotham, Hannah; University of Cambridge, Department of Psychiatry</p> <p>Warwick, Ella; University of Birmingham, Institute for Mental Health and Centre for Human Brain Health</p> <p>Wilson, Martin; University of Birmingham, Institute for Mental Health and Centre for Human Brain Health</p> <p>Kaser, Muzaffer; University of Cambridge, Psychiatry; Cambridgeshire and Peterborough NHS Foundation Trust</p> <p>Murray, Graham K.; University of Cambridge, Psychiatry; Cambridgeshire and Peterborough NHS Foundation Trust</p> <p>Deakin, Bill; The University of Manchester, Faculty of Medicine, Biology and Health</p> <p>Jadon, Deepak; University of Cambridge, Medicine</p> <p>Suckling, John; University of Cambridge, Psychiatry; Cambridgeshire and Peterborough NHS Foundation Trust</p> <p>Barnes, Nicholas ; University of Birmingham, Institute of Clinical Sciences</p> <p>Uptegrove, Rachel; University of Birmingham, Institute for Mental Health and Centre for Human Brain Health; Early Intervention Service, Birmingham Women's and Children's NHS Foundation Trust</p> <p>Khandaker, Golam M.; University of Bristol, MRC Integrative Epidemiology Unit, Population Health Sciences; NIHR Bristol Biomedical Research Centre</p> |
| <b>Primary Subject Heading</b>: | Mental health                                                                                                                                                                                                                                                                                                                                                                                                                                                                                                                                                                                                                                                                                                                                                                                                                                                                                                                                                                                                                                                                                                                                                                                                                                                                                                                                                                                                                                                                                                                                                                                                                                                                                                                                                                                                                                                                                                                                                                                                            |

1  
2  
3  
4  
5  
6  
7  
8  
9  
10  
11  
12  
13  
14  
15  
16  
17  
18  
19  
20  
21  
22  
23  
24  
25  
26  
27  
28  
29  
30  
31  
32  
33  
34  
35  
36  
37  
38  
39  
40  
41  
42  
43  
44  
45  
46  
47  
48  
49  
50  
51  
52  
53  
54  
55  
56  
57  
58  
59  
60

|                            |                                                                                                                                                |
|----------------------------|------------------------------------------------------------------------------------------------------------------------------------------------|
| Secondary Subject Heading: | Immunology (including allergy)                                                                                                                 |
| Keywords:                  | Schizophrenia & psychotic disorders < PSYCHIATRY, IMMUNOLOGY, Clinical trials < THERAPEUTICS, Magnetic resonance imaging < RADIOLOGY & IMAGING |
|                            |                                                                                                                                                |

SCHOLARONE™  
Manuscripts

1  
2  
3 1 **Protocol for the Psychosis Immune Mechanism Stratified Medicine (PIMS) trial: A**  
4  
5 2 **randomised double-blind placebo-controlled trial of single dose tocilizumab in patients**  
6  
7  
8 3 **with psychosis**  
9  
10 4

11  
12 5 Éimear M. Foley<sup>a,b</sup>; Sian Lowri Griffiths<sup>c</sup>; Alexander Murray<sup>c</sup>; Jack Rogers<sup>c</sup>; Fabiana Corsi-  
13  
14 6 Zuelli<sup>c,d,e</sup>; Hannah Hickinbotham<sup>f</sup>; Ella Warwick<sup>c</sup>; Martin Wilson<sup>c</sup>; Muzaffer Kaser<sup>f,g</sup>;  
15  
16 7 Graham K. Murray<sup>f,g</sup>; Bill Deakin<sup>h</sup>; Deepak Jadon<sup>i</sup>; John Suckling<sup>f,g</sup>; Nicholas M. Barnes<sup>e</sup>;  
17  
18 8 Rachel Upthegrove<sup>c,j,†</sup>; and Golam M. Khandaker<sup>a,b,k,l,†,\*</sup>; for the PIMS Collaboration  
19  
20  
21 9

22  
23  
24 10 <sup>a</sup>MRC Integrative Epidemiology Unit, Population Health Sciences, Bristol Medical School,  
25  
26 11 University of Bristol, Bristol, United Kingdom

27  
28 12 <sup>b</sup>Centre for Academic Mental Health, Population Health Sciences, Bristol Medical School,  
29  
30 13 University of Bristol, Bristol, United Kingdom

31  
32 14 <sup>c</sup>Institute for Mental Health and Centre for Human Brain Health, University of Birmingham,  
33  
34 15 Birmingham, United Kingdom

35  
36 16 <sup>d</sup>Department of Neuroscience and Behaviour, Division of Psychiatry, Ribeirão Preto Medical  
37  
38 17 School, University of São Paulo, São Paulo, Brazil

39  
40 18 <sup>e</sup>Institute of Clinical Sciences, College of Medical and Dental Sciences, University of  
41  
42 19 Birmingham, United Kingdom

43  
44 20 <sup>f</sup>Department of Psychiatry, University of Cambridge, United Kingdom

45  
46 21 <sup>g</sup>Cambridgeshire and Peterborough NHS Foundation Trust, United Kingdom

47  
48 22 <sup>h</sup>Faculty of Biology, Medicine and Health, Division of Neuroscience and Experimental  
49  
50 23 Psychology, School of Biological Sciences, University of Manchester, Manchester Academic  
51  
52 24 Health Science Centre, Manchester, United Kingdom

53  
54 25 <sup>i</sup>Department of Medicine, University of Cambridge, United Kingdom  
55  
56  
57  
58  
59  
60

1  
2  
3 26 <sup>j</sup> Early Intervention Service, Birmingham Women's and Children's NHS Foundation Trust  
4

5 27 <sup>k</sup> NIHR Bristol Biomedical Research Centre, Bristol, United Kingdom  
6

7  
8 28 <sup>l</sup> Avon and Wiltshire Mental Health Partnership NHS Trust, Bristol, United Kingdom  
9

10 29

11  
12 30 <sup>†</sup> Joint senior authors  
13

14 31

15  
16  
17 32 \* **Corresponding author and address:** Prof Golam M. Khandaker, MRC Integrative  
18

19 33 Epidemiology Unit, Oakfield House, Oakfield Grove, Clifton, Bristol, BS8 2BN, UK  
20

21 34 Email: [golam.khandaker@bristol.ac.uk](mailto:golam.khandaker@bristol.ac.uk)  
22  
23  
24  
25  
26  
27  
28  
29  
30  
31  
32  
33  
34  
35  
36  
37  
38  
39  
40  
41  
42  
43  
44  
45  
46  
47  
48  
49  
50  
51  
52  
53  
54  
55  
56  
57  
58  
59  
60

## 35 ABSTRACT

36 **Introduction:** Evidence suggests a potentially causal role of interleukin 6 (IL-6), a  
37 pleiotropic cytokine that generally promotes inflammation, in the pathogenesis of psychosis.  
38 However, no interventional studies in patients with psychosis, stratified using inflammatory  
39 markers, have been conducted to assess the therapeutic potential of targeting IL-6 in  
40 psychosis and to elucidate potential mechanism of effect. Tocilizumab is a humanised  
41 monoclonal antibody targeting the IL-6 receptor to inhibit IL-6 signalling licensed in the UK  
42 for treatment of rheumatoid arthritis. The primary objective of this study is to test whether IL-  
43 6 contributes to the pathogenesis of first episode psychosis, and to examine potential  
44 mechanisms by which IL-6 affects psychotic symptoms. A secondary objective is to examine  
45 characteristics of inflammation-associated psychosis.

46 **Methods and analysis:** A proof-of-concept study employing a randomised, parallel-group,  
47 double-blind, placebo-controlled design testing the effect of IL-6 inhibition on anhedonia in  
48 patients with psychosis. Approximately 60 participants with diagnosis of schizophrenia and  
49 related psychotic disorders (ICD-10 codes F20, F22, F25, F28, F29) with evidence of low-  
50 grade inflammation (IL-6  $\geq 0.7$ pg/ml) will receive either one intravenous infusion of  
51 tocilizumab (4.0mg/kg; max 800mg) or normal saline. Psychiatric measures and blood  
52 samples will be collected at baseline, and 7-, 14-, and 28-days post-infusion. Cognitive and  
53 neuroimaging data will be collected at baseline and 14 days post-infusion. In addition,  
54 approximately 30 patients with psychosis without evidence of inflammation (IL-6  $< 0.7$ pg/ml)  
55 and 30 matched healthy controls will be recruited to complete identical baseline assessments  
56 to allow for comparison of the characteristic features of inflammation-associated psychosis.

57 **Ethics and dissemination:** The study is sponsored by the University of Bristol and has been  
58 approved by the Cambridge East Research Ethics Committee (reference: 22/EE/0010; IRAS

1  
2  
3  
4  
5  
6  
7  
8  
9  
10  
11  
12  
13  
14  
15  
16  
17  
18  
19  
20  
21  
22  
23  
24  
25  
26  
27  
28  
29  
30  
31  
32  
33  
34  
35  
36  
37  
38  
39  
40  
41  
42  
43  
44  
45  
46  
47  
48  
49  
50  
51  
52  
53  
54  
55  
56  
57  
58  
59  
60

59 project ID: 301682). Study findings will be published in peer-review journals. Findings will  
60 also be disseminated by scientific presentation and other means.

61 **Trial registration number:** ISRCTN 23256704

62  
63 **KEYWORDS:** Psychotic Disorders; Negative Symptoms; Interleukin 6; Immunotherapy;  
64 Tocilizumab; Clinical Trial.

For peer review only



1  
2  
3 65 ARTICLE SUMMARY  
4  
5

6 66 **Strengths and limitations of this study**  
7

- 8 67 • Adopting a randomised controlled trial (RCT) design and patient selection based on  
9  
10 68 elevated level of IL-6 (in addition to other criteria) will help examine the causal role  
11  
12 69 of IL-6, and the therapeutic potential of targeting IL-6 pathway, in psychosis.  
13  
14  
15 70 • The use of target specific intervention (anti-IL6R monoclonal antibody tocilizumab)  
16  
17 71 will help assess the clinical relevance of IL-6 and related up and downstream  
18  
19 72 inflammatory cytokines in psychosis.  
20  
21  
22 73 • The use of neuroimaging, cognitive tests, and extensive peripheral blood biomarker  
23  
24 74 exploration before and after tocilizumab treatment to assess potential mechanisms of  
25  
26 75 effect.  
27  
28  
29 76 • One dose of tocilizumab is unlikely to be sufficient to test the efficacy of this drug as  
30  
31 77 potential treatment for psychosis, which is not the intention of this study.  
32  
33  
34 78 • Tocilizumab inhibits both IL-6 classical and trans signalling, and consequently the  
35  
36 79 trial will not be able to distinguish between the effects of modulating these two  
37  
38 80 signalling pathways specifically in psychosis.  
39  
40  
41  
42  
43  
44  
45  
46  
47  
48  
49  
50  
51  
52  
53  
54  
55  
56  
57  
58  
59  
60

1  
2  
3 82 **Word count:** 4,336  
4

5 83 INTRODUCTION  
6

7  
8 84 **Scientific background and study rationale**  
9

10 85 The neuroimmune hypothesis of schizophrenia proposes that mild peripheral immune  
11  
12 86 activation gives rise to an inflammatory response in the brain and neurobiological changes  
13  
14 87 associated with psychotic illness [1–4]. Meta-analytic evidence is clear that circulating  
15  
16 88 concentrations of interleukin 6 (IL-6) and other inflammatory proteins, such as C-reactive  
17  
18 89 protein (CRP), are increased in patients with psychosis, including treatment naïve first  
19  
20 90 episode psychosis (FEP) [5], compared with controls [6–9]. Prospective cohort studies show  
21  
22 91 that these indices of mild immune activation precede the onset of symptoms [10,11].  
23  
24 92 Furthermore, genetic variants known to increase IL-6 concentrations are associated with  
25  
26 93 genetic risk of schizophrenia [12,13]. These Mendelian randomization studies eliminate the  
27  
28 94 possibility that raised IL-6 concentrations are a consequence of environmental exposures  
29  
30 95 associated with schizophrenia, such as obesity and smoking and instead suggest that IL-6 has  
31  
32 96 a causal role in psychosis. Extending this approach using the UK Biobank population, we  
33  
34 97 found that genetically-predicted levels of IL-6 were associated with reduced grey matter  
35  
36 98 primarily in the middle temporal gyrus, a region whose gene expression profile is enriched  
37  
38 99 for IL-6 pathway proteins and for neuropsychiatric disorder ontologies [14]. Moreover,  
39  
40 100 clinical studies report correlations between IL-6 levels and structural brain changes in  
41  
42 101 individuals with schizophrenia [15], with reduced grey matter volume being exaggerated in  
43  
44 102 patients with psychosis and elevated inflammatory cytokines [16]. Though this causal  
45  
46 103 evidence strongly implicates IL-6, only an intervention study in patients can test the causal  
47  
48 104 hypothesis.  
49  
50  
51  
52  
53  
54

55  
56 105 The neuroimmune hypothesis generally assumes that microglia, the brain's resident  
57  
58 106 immune cells, are activated and pathogenic in schizophrenia. This is supported by traditional  
59  
60

1  
2  
3 107 neuropathological studies and initial in-vivo PET imaging studies [17–19], possibly reflecting  
4  
5 108 impaired cellular control of inflammation or oxidative defence. Inflammatory damage may  
6  
7  
8 109 also account for evidence of oxidative stress from MRS glutathione studies [20]. However,  
9  
10 110 whether microglia are the direct target of IL-6 is unclear and it is not certain that IL-6 can  
11  
12 111 cross the blood-brain barrier and/or increase its permeability to circulating inflammatory  
13  
14 112 cells, cytokines, and chemokines [2,21]. Additionally, it is increasingly uncertain whether  
15  
16 113 microglial inflammation, as traditionally understood, occurs in schizophrenia [22,23]. Recent  
17  
18 114 meta-analyses of PET radioligand binding studies report decreased rather than increased  
19  
20 115 radioligand binding to activated microglia [24,25]. This may account for the unexpected lack  
21  
22 116 of therapeutic benefit of the anti-microglial antibiotic, minocycline, in recent large clinical  
23  
24 117 trials [26,27]. Furthermore, large transcriptomic studies in post-mortem brains report no  
25  
26 118 change or reduction in microglial gene expression but increases in astrocytic expression  
27  
28 119 [23,28–32]. It is increasingly understood that both peripheral immune responses and brain  
29  
30 120 glial function are regulated by specialised T cells (Tregs), a subset of which reside in brain  
31  
32 121 parenchyma [33,34]. A novel proposal is that Treg hypofunction accounts for mild peripheral  
33  
34 122 immune disinhibition and dysregulated astroglial-microglial interaction, such that microglia  
35  
36 123 are driven into a developmental, synapse-pruning phenotype while astroglia disrupt  
37  
38 124 neurotransmitter function [33,34]. Importantly, there are bidirectional interactions between  
39  
40 125 IL-6 and Treg function [34]. Crucially, we will measure IL-6 in addition to cellular and  
41  
42 126 molecular markers of immune function and investigate how they correlate with central  
43  
44 127 markers and clinical state.  
45  
46  
47  
48  
49

50  
51 128       Previous attempts testing the inflammatory hypothesis in therapeutic clinical trials  
52  
53 129 have been attempted. However, little evidence of overall efficacy has been found [35]. These  
54  
55 130 trials have generally tested broad spectrum agents, such as non-steroidal anti-inflammatory  
56  
57 131 drugs, with no attempt to stratify patients according to evidence of inflammation. A trial  
58  
59  
60

1  
2  
3 132 using tocilizumab, a humanised monoclonal antibody (mAb) against the IL-6 receptor  
4  
5 133 currently licensed in the UK for treatment of rheumatoid arthritis (RA) and severe  
6  
7 134 coronavirus disease, reported no improvements in any clinical measure in a small sample of  
8  
9 135 36 patients with established schizophrenia [36]. However, as mentioned previously, no  
10  
11 136 stratification by inflammatory markers or any mechanistic immune measures was applied.  
12  
13 137 Low-grade inflammation is associated with poor response to antipsychotic drugs [37], but  
14  
15 138 immunotherapy is unlikely to be relevant for all patients with psychosis. Meta-analysis  
16  
17 139 suggests that evidence of immune activation, defined by elevated CRP levels, is present in a  
18  
19 140 quarter to one third of patients with schizophrenia [38]. A randomised controlled trial of  
20  
21 141 infliximab, an anti-tumour necrosis factor alpha (TNF- $\alpha$ ) mAb, reported that antidepressant  
22  
23 142 response was associated with higher CRP levels at baseline [39], suggesting that patients with  
24  
25 143 evidence of immune activation may be better candidates for immunotherapy trials. As far as  
26  
27 144 we are aware, no previous clinical trial has selected patients with schizophrenia based on  
28  
29 145 evidence of immune activation.  
30  
31  
32  
33  
34

35 146 Selection of patients with particular symptom profiles and/or stage of illness may also  
36  
37 147 be a useful strategy that needs to be employed in immunotherapy trials for schizophrenia. A  
38  
39 148 wide variety of symptoms occur in schizophrenia such as hallucinations, delusions,  
40  
41 149 anhedonia, cognitive dysfunction, and affective symptoms and presentation of these  
42  
43 150 symptoms differ from one individual to another. Some symptoms may be more related to  
44  
45 151 inflammation than others. For instance, meta-analytic data suggests that elevated  
46  
47 152 proinflammatory cytokines are associated with negative psychotic symptomatology [40].  
48  
49 153 Moreover, a recent study from the ALSPAC birth cohort reported that out of 20 positive and  
50  
51 154 negative symptoms, CRP is particularly associated with anhedonia and auditory  
52  
53 155 hallucinations [41]. Lastly, results from work we have completed to date as part of the MRC-  
54  
55 156 funded larger PIMS collaboration (MR/S037675/1), suggest that anhedonia may be a  
56  
57  
58  
59  
60

1  
2  
3 157 promising target in early phases of established psychotic disorder. Anhedonia and  
4  
5 158 amotivation are strongly associated with poor functional outcomes in depression and  
6  
7 159 schizophrenia, and present a formidable barrier to returning to work or building relationships  
8  
9  
10 160 [42,43]. Patients with psychotic disorders also present with cognitive deficits in a range of  
11  
12 161 domains [44]. Available antipsychotic medications have a limited effects on poor cognitive  
13  
14 162 functioning in psychosis [45]. Illness stage may also be of relevance. Meta-analytic data has  
15  
16 163 revealed no differences in IL-6 levels between stable, medicated patients with schizophrenia  
17  
18 164 and controls, although compared with controls, IL-6 levels were similarly elevated in patients  
19  
20 165 with FEP and those with acute relapse [7]. A separate meta-analysis found evidence of  
21  
22 166 elevated blood cytokine levels in acutely and chronically ill patients with schizophrenia [6].  
23  
24 167 Focusing on particular inflammation-related symptoms, such as anhedonia, and/or illness  
25  
26 168 stage may increase the chance of success for immunotherapy trials.  
27  
28  
29  
30  
31  
32

### 33 170 **Proposed study**

34  
35 171 The proposed study is a UK multi-site (Birmingham, Bristol, and Cambridge) proof-of-  
36  
37 172 concept, randomised, parallel-group, double-blind, placebo-controlled trial.  
38  
39  
40  
41

### 42 174 *Study aims and hypotheses*

43  
44 175 The primary aim of this trial is to examine potential mechanisms by which IL-6 affects  
45  
46 176 anhedonia, psychotic symptoms, and cognition. Our primary hypothesis is that inhibition of  
47  
48 177 IL-6 signalling with a single intravenous infusion of anti-IL6R monoclonal antibody,  
49  
50 178 tocilizumab, in individuals with psychosis and elevated IL-6 at baseline will attenuate  
51  
52 179 symptoms of anhedonia and amotivation in patients with psychosis, relative to placebo. This  
53  
54 180 will provide further evidence for a potential causal role of inflammation in psychosis. Our  
55  
56 181 secondary hypothesis is that reduction in peripheral inflammation after tocilizumab infusion  
57  
58  
59  
60

1  
2  
3 182 in patients with psychosis and evidence of inflammation will be associated with central  
4  
5 183 measures of oxidative stress and relevant resting state brain function.  
6  
7

8 184 We will also conduct deep immunophenotyping of peripheral blood mononuclear cell  
9  
10 185 subsets (CD4<sup>+</sup>, CD8<sup>+</sup>, Tregs, natural killer and natural killer-T cells, monocytes, and B cells)  
11  
12 186 to characterise their absolute number, frequency, and function. The level of IL-6/STAT3  
13  
14 187 signalling inhibition within both innate and adaptive immune cells will also be examined  
15  
16 188 using multi-colour flow cytometry with an established optimised pSTAT3 phosflow assay.  
17  
18 189 This will help identify the potential cellular impact of peripheral inflammation in psychosis,  
19  
20 190 which is largely unknown. Functional assessment of IL-6/STAT3 signalling in immune cell  
21  
22 191 subsets and their response to exogenous IL-6 stimulation will inform abnormal immune  
23  
24 192 response in psychosis and allow measurement of response to tocilizumab at the cellular level.  
25  
26  
27

28 193 A secondary objective is to carry out an observational study to examine clinical and  
29  
30 194 biomarker differences and similarities between patients with psychotic disorder with and  
31  
32 195 without evidence of inflammation and healthy controls (HCs). We hypothesise that  
33  
34 196 individuals with psychotic disorder and evidence of inflammation, compared to those without  
35  
36 197 evidence of inflammation and HCs, will have increased symptoms of anhedonia and  
37  
38 198 amotivation, poorer cognitive functioning, and cellular and brain-based measures of immune  
39  
40 199 dysfunction.  
41  
42  
43

44 200

## 47 201 METHODS

48 202 This protocol has been prepared in accordance with the Standard Protocol Items:  
49  
50 203 Recommendations for Interventional Trials (SPIRIT) 2013 statement [46]. Please see  
51  
52 204 supplementary eTable 1 for the SPIRIT checklist. The planned start date for the PIMS trial  
53  
54 205 was 1<sup>st</sup> November 2021, however, this was delayed due to the COVID-19 pandemic. We  
55  
56 206 began recruiting at our site in Birmingham in November 2022, and we soon expect  
57  
58  
59  
60

1  
2  
3 207 recruitment to begin at our Bristol and Cambridge sites. The planned end date is 31<sup>st</sup> May  
4  
5 208 2024.  
6  
7  
8 209

## 10 210 **Patient and public involvement**

11  
12 211 The study protocol was prepared in collaboration with individuals with lived experience of  
13  
14 212 mental illness who contributed to the development of participant information sheet, consent  
15  
16 213 forms (Appendix I, II, and III), and data collection procedures.  
17  
18  
19 214

## 22 215 **Study design and sample**

23  
24 216 See Figure 1 for an overview of study design. Individuals residing in Birmingham, Bristol, or  
25  
26 217 Cambridge in the United Kingdom will be recruited. Approximately 60 participants with first  
27  
28 218 episode psychosis and evidence of inflammation (i.e., IL-6  $\geq 0.7$ pg/ml) will be randomised to  
29  
30 219 receive either one intravenous infusion of tocilizumab (drug) or normal saline (placebo). For  
31  
32 220 the secondary, observational study, we will compare baseline characteristics of the  
33  
34 221 intervention cohort with approximately 30 participants with psychosis without evidence of  
35  
36 222 inflammation (i.e., IL-6  $< 0.7$ pg/ml), and approximately 30 HCs across Birmingham and  
37  
38 223 Cambridge. Participants without evidence of inflammation and controls will not be  
39  
40 224 randomised as they will not receive any intervention. Neuroimaging will only be undertaken  
41  
42 225 by those without MRI contraindications who have given specific informed consent for MRI.  
43  
44 226 Participants not eligible or not consenting for MRI will take part in all other aspects of the  
45  
46 227 study.  
47  
48  
49  
50  
51  
52  
53

## 54 229 **Intervention**

55  
56 230 Single intravenous infusion of tocilizumab (4.0mg/kg; max 800mg in total) or normal saline  
57  
58 231 given to participants with psychosis and evidence of inflammation. Tocilizumab blocks both  
59  
60

1  
2  
3 232 IL-6 classic and trans-signalling – the latter being responsible for most of the inflammatory  
4  
5 233 effects of IL-6 – providing broad inhibition of IL-6 signalling and a strong test of a casual  
6  
7 234 role for IL-6 in psychosis [47]. Tocilizumab is the first-in-class, humanized monoclonal  
8  
9 235 antibody against the IL-6R, commercially available and licensed in the UK for treatment of  
10  
11 236 RA. Approved dosage of tocilizumab for treatment of RA is 2, 4, or 8mg/kg; max 800mg in  
12  
13 237 total. In RA, a single tocilizumab infusion has shown to improve clinical and laboratory  
14  
15 238 measures within 48 hours, with most noticeable results in one-to-two weeks [48,49]. The  
16  
17 239 follow-up schedule for our study is in keeping with this observation.  
18  
19  
20  
21  
22

240

### 241 **Eligibility criteria**

242 We will recruit participants aged 18-40 years. Patient participants must meet International  
243 Classification of Diseases 10<sup>th</sup> Revision (ICD-10) criteria for a diagnosis of schizophrenia  
244 and related psychoses (ICD-10 code F20, F22, F25, F28, F29) at the time of eligibility  
245 assessment, be within three years of first diagnosis of psychotic disorder, be on a stable  
246 treatment regime with no recent (within two weeks) initiation, cessation, or change in class of  
247 antipsychotic medication, and have a Positive and Negative Syndrome Scale (PANSS) item  
248 score  $\geq 3$  on P1 (delusions), P2 (conceptual disorganisation), P3 (hallucinatory behaviour), or  
249 P6 (suspiciousness/persecution). Additionally, patients recruited to the interventional arm  
250 will be required to have serum IL-6 levels  $\geq 0.7$ pg/ml and a Temporal Experience of Pleasure  
251 Scale (TEPS) anticipatory pleasure score  $\leq 41$  (based on item numbers 1, 3, 7, 11, 12, 14, 15,  
252 16, 17, and 8) and consummatory pleasure score  $\leq 36$  (based on item numbers 2, 4, 5, 6, 8, 9,  
253 10, and 13). The threshold of serum IL-6  $\geq 0.7$ pg/mL as evidence of inflammation for this  
254 particular trial was chosen based on observations from the Personalised Prognostic Tools for  
255 Early Psychosis Management (PRONIA) cohort [<https://www.pronia.eu>]. In 192 first-episode  
256 psychosis patients included in the PRONIA study, the median value of serum IL-6 was



257 0.49pg/mL (25<sup>th</sup> percentile 0.22pg/mL; 75<sup>th</sup> percentile 1.11pg/mL), and the mean was  
 258 0.79pg/mL (SD  $\pm$  0.84). Based on these observations, we chose the cut-off of 0.7pg/mL for  
 259 patient selection in current trial. Finally, COVID-19 anti-body titre test will be used to  
 260 determine adequate levels of immune response via the following cut-offs (for poor response):  
 261 400IU Roche/700IU Abbot assay.

262 HCs will have no current or lifetime history of psychiatric diagnosis, as determined by  
 263 the Mini-International Neuropsychiatric Interview (MINI). See Table 1 for complete  
 264 inclusion and exclusion criteria. HCs will be matched to patient participants at the group level  
 265 by age and sex.

266  
 267 **Table 1. PIMS Trial inclusion and exclusion criteria.**

| Group            | Inclusion criteria                                                                                                                                                                                                                                                                | Exclusion criteria                                                                                                                                                                                                                                                                                                                                                                                                                                                                                                                                                                                                                                                                                                                                                                                                                                                                                                                                                                                                                                                                                                                                  |
|------------------|-----------------------------------------------------------------------------------------------------------------------------------------------------------------------------------------------------------------------------------------------------------------------------------|-----------------------------------------------------------------------------------------------------------------------------------------------------------------------------------------------------------------------------------------------------------------------------------------------------------------------------------------------------------------------------------------------------------------------------------------------------------------------------------------------------------------------------------------------------------------------------------------------------------------------------------------------------------------------------------------------------------------------------------------------------------------------------------------------------------------------------------------------------------------------------------------------------------------------------------------------------------------------------------------------------------------------------------------------------------------------------------------------------------------------------------------------------|
| All participants | <ul style="list-style-type: none"> <li>- Provide informed consent.</li> <li>- Understand written and spoken English.</li> <li>- Able and willing to consent to blood sampling.</li> <li>- Willing to abstain from strenuous exercise for 72 hours prior to assessment.</li> </ul> | <ul style="list-style-type: none"> <li>- Pregnancy (confirmed by urine pregnancy test) or breast feeding.</li> <li>- Body mass index &gt;35.</li> <li>- Current or lifetime diagnosis of antisocial personality disorder, autism or other neurodevelopmental disorder, major traumatic brain injury.</li> <li>- Currently active diagnosed eating disorder likely to compromise ability to take part.</li> <li>- History of alcohol or substance use disorder (abuse/dependence) within six months prior to eligibility assessment (nicotine and caffeine dependence are not exclusionary).</li> <li>- Current use of medication likely to compromise interpretation of immunological data.</li> <li>- Known active current or history of recurrent bacterial, viral, fungal, mycobacterial, or other opportunistic infections.</li> <li>- Current infection with VZV, TB, Hepatitis B, Hepatitis C, or HIV confirmed by blood test. Chest X-ray will also be performed to assess for TB.</li> <li>- Any major episode of infection requiring hospitalisation or treatment with IV antibiotics within 4 weeks of eligibility assessment.</li> </ul> |

|                                                        |                                                                                                                                                                                                                                                                                                                                                                                                                                                                                                                                                                                                                                                                                                                                                                                                                                                                                     |                                                                                                                                                                                                                                                                                                                                                                                                                                                                                                                                                                                                                                                                                                                                                                                                                                      |
|--------------------------------------------------------|-------------------------------------------------------------------------------------------------------------------------------------------------------------------------------------------------------------------------------------------------------------------------------------------------------------------------------------------------------------------------------------------------------------------------------------------------------------------------------------------------------------------------------------------------------------------------------------------------------------------------------------------------------------------------------------------------------------------------------------------------------------------------------------------------------------------------------------------------------------------------------------|--------------------------------------------------------------------------------------------------------------------------------------------------------------------------------------------------------------------------------------------------------------------------------------------------------------------------------------------------------------------------------------------------------------------------------------------------------------------------------------------------------------------------------------------------------------------------------------------------------------------------------------------------------------------------------------------------------------------------------------------------------------------------------------------------------------------------------------|
|                                                        |                                                                                                                                                                                                                                                                                                                                                                                                                                                                                                                                                                                                                                                                                                                                                                                                                                                                                     | <ul style="list-style-type: none"> <li>- Unstable cardiac, pulmonary, renal, hepatic, endocrine, hematologic, or active infectious disease, including current or prior malignancy.</li> <li>- Diverticulitis, inflammatory bowel disease, or uncontrolled gastric/duodenal ulcer.</li> <li>- Concomitant auto-immune or auto-inflammatory rheumatological disease.</li> <li>- Concomitant treatment with any biologic drugs.</li> <li>- Current and active ischemic heart disease.</li> <li>- Uncontrolled hypertension defined as systolic blood pressure &gt; 170 or diastolic blood pressure &gt; 110.</li> <li>- History of severe allergic or anaphylactic reactions to human, humanized or murine monoclonal antibodies.</li> <li>- No history of chicken pox infection or no history of varicella zoster immunity.</li> </ul> |
| Additional criteria for neuroimaging (optional)        | - Able and willing to consent to MRI scanning                                                                                                                                                                                                                                                                                                                                                                                                                                                                                                                                                                                                                                                                                                                                                                                                                                       | - Contraindications to MRI.                                                                                                                                                                                                                                                                                                                                                                                                                                                                                                                                                                                                                                                                                                                                                                                                          |
| Additional criterion for healthy controls              | - No current or lifetime psychiatric diagnosis.                                                                                                                                                                                                                                                                                                                                                                                                                                                                                                                                                                                                                                                                                                                                                                                                                                     |                                                                                                                                                                                                                                                                                                                                                                                                                                                                                                                                                                                                                                                                                                                                                                                                                                      |
| Additional criteria for all individuals with psychosis | <ul style="list-style-type: none"> <li>- Meet ICD-10 criteria for a diagnosis of schizophrenia and related psychoses (code F20, F22, F25, F28, F29) at the time of eligibility assessment, as determined by the Mini-International Neuropsychiatric Interview.</li> <li>- Be within three years of first diagnosis of psychotic disorder.</li> <li>- On stable treatment regime with no recent (within 2 weeks) initiation, cessation, or change in class of antipsychotic medication.</li> <li>- No indication or other reason for preclusion into research (e.g., significant risk of suicidal behaviour or risk to others) as determined by their clinical team.</li> <li>- Positive and Negative Syndrome Scale item score <math>\geq 3</math> on P1 (delusions), P2 (conceptual disorganisation), P3 (hallucinatory behaviour), OR P6 (suspiciousness/persecution).</li> </ul> |                                                                                                                                                                                                                                                                                                                                                                                                                                                                                                                                                                                                                                                                                                                                                                                                                                      |

|                                                                       |                                                                                                                                                                                                                                                                                                                                                                                                                                                                                                                                                                                    |  |
|-----------------------------------------------------------------------|------------------------------------------------------------------------------------------------------------------------------------------------------------------------------------------------------------------------------------------------------------------------------------------------------------------------------------------------------------------------------------------------------------------------------------------------------------------------------------------------------------------------------------------------------------------------------------|--|
| Additional criteria for intervention group                            | <ul style="list-style-type: none"> <li>- Serum IL-6 level <math>\geq 0.7</math>pg/ml at eligibility and baseline assessment.</li> <li>- Temporal Experience of Pleasure Scale anticipatory pleasure score <math>\leq 41</math> (based upon item numbers 1, 3, 7, 11, 12, 14, 15, 16, 17, and 8) and consummatory pleasure score <math>\leq 36</math> (based upon item numbers 2, 4, 5, 6, 8, 9, 10, and 13).</li> <li>- Evidence of COVID-19 immunity required prior to infusion, confirmed before randomisation using evidence of vaccination and antibody titre test.</li> </ul> |  |
| Additional criterion for patients with psychosis without inflammation | <ul style="list-style-type: none"> <li>- Serum IL-6 level <math>&lt; 0.7</math>pg/ml at eligibility and baseline assessment.</li> </ul>                                                                                                                                                                                                                                                                                                                                                                                                                                            |  |

270

271 **Study outcomes**

272 The primary outcome is anhedonia, defined as anticipatory and consummatory pleasure  
 273 scores, assessed by the TEPS [50] at approximately day 14 post-infusion. We will also collect  
 274 data on several secondary/exploratory measures including 1) clinical outcomes, namely  
 275 positive and negative symptoms of psychosis, depressive symptoms, fatigue, general quality  
 276 of life and subjective wellbeing, 2) cognitive function (psychomotor speed, attention,  
 277 memory, and executive function), 3) neuroimaging outcomes based on comparisons of brain  
 278 structure, function, and oxidative stress levels using MRI and MRS outcomes, 4) blood  
 279 biomarker outcomes, namely peripheral blood inflammatory markers, biochemical assays,  
 280 including cortisol and cardiometabolic markers, and peripheral blood cellular  
 281 immunophenotyping, and 5) genetic outcomes including DNA and RNA sequencing and  
 282 epigenetic mechanism assessment with methylation assays (see Table 2 for more  
 283 details). Where possible, blood samples will be collected during working hours and time of

284 sampling will be recorded. However, a specified time window will not be given to ease  
 285 burden on patients and to maximise participation.

286  
 287 **Table 2. PIMS trial study measures**

| Domain                     | Tool                                                      | Source                       | Validated Tool | Time of assessment                |
|----------------------------|-----------------------------------------------------------|------------------------------|----------------|-----------------------------------|
| Sociodemographic/lifestyle | Screening questionnaire                                   | Self-report                  |                | Screening                         |
|                            | Medical History Questionnaire                             | Self-report/General practice |                | Eligibility                       |
|                            | Substance Use Questionnaire                               | Self-report                  |                | Eligibility                       |
|                            | Physical Measurements Form                                | Self-report                  |                | Baseline                          |
|                            | Sociodemographic Questionnaire                            | Self-report                  |                | Baseline                          |
| Psychiatric                | The Temporal Experience of Pleasure Scale                 | Self-report                  | ✓              | Eligibility, baseline, follow-ups |
|                            | The Positive and Negative Syndrome Scale                  | Interviewer assessed         | ✓              | Eligibility, baseline, follow-ups |
|                            | The Mini-International Neuropsychiatric Interview         | Interviewer assessed         | ✓              | Eligibility                       |
|                            | Psychiatric History Questionnaire                         | Self-report                  |                | Baseline                          |
|                            | The Scale for the Assessment of Negative Symptoms         | Self-report                  | ✓              | Baseline, follow-ups              |
|                            | The Calgary Depression Scale for Schizophrenia            | Interviewer assessed         | ✓              | Baseline, follow-ups              |
|                            | Multi-dimensional Fatigue Inventory                       | Self-report                  | ✓              | Baseline, follow-ups              |
|                            | European Quality of Life-5 Dimensions Three-Level Version | Self-report                  | ✓              | Baseline, follow-ups              |
| Cognitive                  | Visual Analogue Scale for Subjective Wellbeing            | Self-report                  | ✓              | Baseline, follow-ups              |
|                            | National Adult Reading Test for                           | Interviewer assessed         | ✓              | Baseline, follow-up 2             |

|              |                                                                                                 |                  |   |                       |
|--------------|-------------------------------------------------------------------------------------------------|------------------|---|-----------------------|
|              | estimated premorbid IQ                                                                          |                  |   |                       |
|              | CANTAB Reaction Time test                                                                       | Computer task    | ✓ | Baseline, follow-up 2 |
|              | Symbol Coding Test                                                                              | Paper task       | ✓ | Baseline, follow-up 2 |
|              | CANTAB Rapid Visual Information Processing test                                                 | Computer task    | ✓ | Baseline, follow-up 2 |
|              | CANTAB Paired Associates Learning test                                                          | Computer task    | ✓ | Baseline, follow-up 2 |
|              | CANTAB One Touch Stockings of Cambridge test                                                    | Computer task    | ✓ | Baseline, follow-up 2 |
| Biologic     | Inflammatory markers, cardiometabolic markers,IDO activation, white cell phenotyping            | Laboratory tests |   | Baseline, follow-ups  |
| Genetic      | RNA and DNA sequencing, methylation assay                                                       | Blood (RNA, DNA) |   | Baseline, follow-ups  |
| Neuroimaging | MRI Screening Questionnaire                                                                     |                  |   | Baseline, follow-up 2 |
|              | Structural MRI, 1H-MRS measure of glutathione in the prefrontal cortex area, resting state fMRI |                  |   | Baseline, follow-up 2 |

289

### 290 **Sample size and statistical power**

291 We will recruit approximately 60 patients with psychosis. However, currently there are no

292 trials of immunotherapies for anhedonia in schizophrenia making accurate power calculation

293 difficult. This study is a proof-of-concept experiment designed to test whether inhibition of

294 IL-6 signalling leads to changes in psychotic symptoms. It could also inform likely statistical

295 power for future trials testing efficacy of the drug as a treatment of schizophrenia, which is

296 not the intention of this study. The exact statistical tests and techniques that will be applied to

1  
2  
3 297 the data will depend on the objective of specific analysis and data characteristics (e.g.,  
4  
5 298 variable type, distribution). These details will be specified in analysis plans and registered  
6  
7  
8 299 online before participants are unblinded and any data analysis is performed.  
9

10 300

### 11 301 **Randomisation and blinding**

12  
13  
14 302 An external agency independent of the study team will arrange random allocation to  
15  
16  
17 303 tocilizumab or normal saline group 1:1, ensuring two groups are comparable regarding  
18  
19 304 anhedonia severity and sex. Randomisation will be stratified by site. Randomising agency  
20  
21  
22 305 will provide the randomisation code to the relevant hospital pharmacy who will dispense  
23  
24 306 tocilizumab or normal saline according to the randomisation schedule. Dispensing  
25  
26 307 pharmacies will keep a log of products dispensed. Infusions will be prepared and  
27  
28 308 administered at clinical research facilities (CRFs). Infusion packs will be prepared by trained  
29  
30 309 staff not part of the core study team, ensuring blinding of treatment allocation. Infusion packs  
31  
32 310 containing drug or placebo will be visually indistinguishable from each other, ensuring that  
33  
34  
35 311 both participants and study team remain blind regarding treatment allocation.  
36

37 312

### 38 313 **Statistical analysis**

39  
40  
41  
42 314 For randomised participants, an intention-to-treat approach will be taken for data analysis by  
43  
44 315 including all randomised participants in statistical analyses, regardless of the treatment they  
45  
46 316 received (if any). We will compare outcome measures between treatment and placebo groups  
47  
48 317 controlling for baseline scores. This mechanistic experiment will focus on overall pattern of  
49  
50 318 results and their effect sizes rather than *P*-values for individual tests of statistical significance.  
51  
52  
53 319 The secondary mechanistic and observational analysis will compare psychotic symptoms,  
54  
55 320 cognitive function, blood, neuroimaging, and other biomarkers between and across study  
56  
57  
58 321 groups using appropriate statistical tests.  
59  
60

1  
2  
3 322  
4  
5  
67 324 **STUDY PROCEDURE**

8  
9 325 An overview of study procedures is presented in Figure 1 and all study measures are detailed  
10  
11 326 in Table 2. Recruitment will take place in Birmingham, Bristol, and Cambridge and  
12  
13 327 assessments at University and NHS research facilities.  
14  
15

16 328

17  
18 329 **Participant identification**

19  
20 330 Potential participants with psychosis will be identified by NHS Psychosis Early Intervention  
21  
22 331 (EI) teams. HCs will be recruited through advertisement methods in Birmingham and  
23  
24 332 Cambridge. Potential participants will complete a screening questionnaire to confirm their  
25  
26 333 eligibility to participate. If deemed eligible, participants will be invited to an appointment to  
27  
28 334 complete a full eligibility assessment.  
29  
30

31  
32 33533  
34 336 **Eligibility assessment**

35  
36 337 Assessments will be carried out to establish eligibility and to obtain informed consent.  
37  
38 338 Patients will complete the MINI to confirm ICD-10 diagnosis of schizophrenia and related  
39  
40 339 psychoses, the PANSS to confirm the presence of positive symptoms of psychosis, and the  
41  
42 340 TEPS to confirm eligibility based on anticipatory and consummatory pleasure sum scores. A  
43  
44 341 blood sample will be collected from patients for serum IL-6 measurement. An MRI screening  
45  
46 342 questionnaire will be administered to those willing to give informed consent for  
47  
48 343 neuroimaging.  
49  
50

51  
52 34453  
54 345 **Baseline assessment**

55  
56 346 All participants (60 inflamed psychosis, 30 non-inflamed psychosis, and 30 HCs) will attend  
57  
58 347 a baseline assessment comprising psychiatric measures, cognitive tasks, blood sampling, and  
59  
60

1  
2  
3 348 neuroimaging (optional). This will be the final study contact for patients without evidence of  
4  
5 349 inflammation and HCs. Patients with evidence of inflammation will undergo further tests to  
6  
7  
8 350 establish safety/eligibility to receive tocilizumab, including a chest X-ray and blood tests to  
9  
10 351 exclude pregnancy and certain infections, such as TB, HIV, and COVID-19. Eligible  
11  
12 352 participants will be randomised and invited for infusion.  
13  
14  
15 353

### 16 17 354 **Intervention**

18  
19 355 Intravenous infusion of tocilizumab or normal saline will be given continuously over one  
20  
21 356 hour at CRFs in Birmingham, Bristol, and Cambridge by trained clinical staff under the  
22  
23  
24 357 supervision of a designated study doctor. Participants will remain under clinical observation  
25  
26 358 for a further 1-hour period after the end of infusion.  
27  
28  
29 359

### 30 31 360 **Follow-up assessments**

32  
33 361 Follow-up assessments will take place approximately 7-, 14-, and 28-days post-infusion, and  
34  
35 362 will collect similar data to the baseline assessment. Cognitive tasks and neuroimaging  
36  
37 363 (optional) will be administered only on day 14. Around 42 days post-infusion, participants  
38  
39 364 will be contacted by phone to provide a final debrief; at which point they will exit the study.  
40  
41  
42 365

## 43 44 366 **RISK MANAGEMENT**

### 45 46 47 367 **Psychosis-related risks**

48  
49 368 All patients will be under the care of a specialist NHS psychosis EI service. Participation will  
50  
51 369 not involve any treatment modifications or significant delays in receiving treatment. If a  
52  
53 370 patient becomes distressed during an assessment, or does not wish to continue for any reason,  
54  
55 371 the researcher will stop the assessment. Participants may withdraw at any time without giving  
56  
57  
58  
59  
60



1  
2  
3 372 a reason. If there is any concern for the participant's safety, the research team will liaise with  
4  
5 373 participant's GP and/or mental health team as needed.  
6  
7  
8 374

9  
10 375 **Procedure-related risks**  
11

12 376 *Venepuncture*  
13

14 377 Blood taking is associated with mild discomfort and other side effects are rare. Efforts will be  
15  
16 378 made to minimise discomfort. Blood taking will be performed by a nurse, doctor, or research  
17  
18 379 team member trained in venepuncture.  
19  
20  
21 380

22  
23  
24 381 *Chest X-ray*  
25

26 382 This study will use a typical effective radiation dose of 0.014 mSv; equivalent to 2.5 days of  
27  
28 383 average natural background radiation in the UK. The risk of developing cancer as a  
29  
30 384 consequence of participating in this study is 0.0001%. Only non-pregnant, adult participants  
31  
32 385 will be included.  
33  
34  
35 386

36  
37 387 *Neuroimaging*  
38

39  
40 388 Discomfort during MRI will be minimised by using mirrors to allow participants to view  
41  
42 389 outside of the machine, providing ear plugs and a panic button, and allowing participants to  
43  
44 390 communicate with the researcher and scan operator throughout. Mild transient vertigo may be  
45  
46 391 experienced when being moved into the MRI machine. Risk of dislodgement or malfunction  
47  
48 392 of medical implants or metallic foreign objects will be minimised by screening participants to  
49  
50 393 ensure no metal is present on or within the body.  
51  
52  
53 394

54  
55  
56 395 *IL-6 levels*  
57  
58  
59  
60

1  
2  
3 396 We expect some 30-50% of patient participants to have evidence of inflammation in the  
4  
5 397 blood (IL-6  $\geq 0.7$ pg/ml). This is not a cause for concern. Reasons for elevated IL-6 in the  
6  
7 398 absence of an acute infection or chronic inflammatory illness could include obesity, smoking,  
8  
9 399 alcohol use, and lack of exercise, so knowledge of 'inflammation status' may prompt  
10  
11 400 participants to adopt a healthier lifestyle. If serum IL-6 level is high (i.e., IL-6  $\geq 0.7$ pg/ml)  
12  
13 401 along with elevated CRP ( $>20$ mg/L) without any apparent explanation, such as infection or  
14  
15 402 chronic inflammatory illness, we will inform the participant's GP and the participant will be  
16  
17 403 excluded from the study.  
18  
19  
20  
21  
22

404

#### 405 *Risk to research staff*

406 Staff will follow local safety procedures when lone working. No other risks are anticipated.

407

#### 408 **Safety considerations for infusion and monitoring of adverse reaction**

##### 409 *Before infusion*

410 Participants will be selected based on strict inclusion and exclusion criteria. Additionally, we  
411 will carry out tests for TB, HIV, VZV antibody, and Hepatitis B and C because, though  
412 unlikely after a single dose, tocilizumab could make these infections worse. Female  
413 participants of childbearing age will be given a pregnancy test, which must be negative.  
414 Participants who are sexually active will be asked to use at least one form of effective  
415 contraception for six weeks post-infusion. Male participants will also be asked not to donate  
416 sperm samples for six weeks post-infusion.

417

##### 418 *During infusion*

1  
2  
3 419 Infusions will be given under supervision of a designated study doctor. Participants will be  
4  
5 420 monitored for possible side effects, which will be managed in line with use of tocilizumab for  
6  
7 421 treating patients with RA.  
8  
9

10 422

11  
12 423 *After infusion*

13  
14 424 Participants will remain under observation for one-hour post-infusion. Participants will be  
15  
16 425 advised to seek help if they feel unwell after leaving the assessment centre and will be given  
17  
18 426 an information sheet containing a telephone number their health professionals can call. If  
19  
20 427 necessary, we will unblind the participant and inform their health professional whether they  
21  
22 428 received tocilizumab or normal saline. Adverse reactions will be recorded at each follow-up  
23  
24 429 visit. Additional, safety blood tests will be done at second follow-up (e.g., WBC count, liver  
25  
26 430 function, lipids).  
27  
28  
29

30 431

31  
32  
33 432 ETHICS AND DISSEMINATION

34  
35 433 The study will be conducted in accordance with the REC, Health Research Authority (HRA),  
36  
37 434 and local Research and Development (R&D) department approvals and guidelines (REC  
38  
39 435 reference: 22/EE/0010). The study team will prepare protocol amendments as required and  
40  
41 436 ethics approval will be sought before implementing any changes to the approved protocol.  
42  
43 437 The ISRCTN Trial Registry and the Research Governance Office will be informed of any  
44  
45 438 amendments to the protocol.  
46  
47  
48

49 439

50  
51 440 **Consent**

52  
53 441 Informed consent will be obtained prior to eligibility assessments for participation in the  
54  
55 442 study (Appendix I, II, and II). This will include consent to randomise, for contact with their  
56  
57 443 GP to inform them about participation, access GP/psychiatric records to verify medical  
58  
59  
60

1  
2  
3 444 history to establish eligibility, and to inform the participant's GP any results/outcomes as  
4  
5 445 necessary. Consent for additional tests to establish safety for tocilizumab infusion and for  
6  
7  
8 446 storing biological samples will also be obtained.  
9

10 447

### 11 448 **Study management**

12  
13  
14 449 The study is sponsored by the University of Bristol. The sponsor, the Chief Investigator  
15  
16 450 (GMK), and the co-Lead (RU) will have overall responsibility for the study. A named  
17  
18 451 principal investigator will take clinical responsibility for study activities at each site. The  
19  
20 452 study does not require the formal arrangement of a steering committee because, according to  
21  
22 453 the HRA, it is not a Clinical Trial of an Investigational Medicinal Product. However, to  
23  
24 454 enhance monitoring of the study, a study management group will be established, comprising  
25  
26 455 academic and clinical experts in psychiatry, rheumatology, neuroscience, and immunology.  
27  
28  
29

30 456

### 31 457 **Data management and retention of samples**

32  
33 458 All potential participants will be assigned a unique study-specific participant ID number. All  
34  
35 459 data will be subject to good practice as laid down in the Data Protection Act. Each study  
36  
37 460 stage is tracked so that participant's (de-identified) status within the study is known, and  
38  
39 461 assessment and other appointment dates are forecasted. This information is held on a secure,  
40  
41 462 password-protected database. Anonymised data from assessments will be uploaded to a  
42  
43 463 secure, password-protected database using secure web-based data entry systems. Minimal  
44  
45 464 personal data (age, sex) will be indexed by each participant's unique ID number. Blood  
46  
47 465 samples collected in this study may be stored for up to 10 years after the completion for  
48  
49 466 additional research. Stored samples will be coded throughout the sample storage and analysis  
50  
51 467 process and will not be labelled with personal identifiers. Participants may withdraw their  
52  
53 468 consent for their samples to be stored for future research.  
54  
55  
56  
57  
58  
59  
60

1  
2  
3 4694  
5 470 **Dissemination plan**

6  
7  
8 471 Study results will be published in peer-review journals and will conform to the guidelines of  
9  
10 472 the International Committee of Medical Journal Editors. Findings will be disseminated at  
11  
12 473 conferences, departmental talks, and via social and traditional media.  
13  
14

15 474

16  
17 475 **AUTHORS CONTRIBUTIONS**

18  
19 476 ÉMF wrote first draft of the PIMS trial protocol and of this manuscript. SLG, MK, GKM,  
20  
21 477 BD, DJ, JS, and NMB contributed to study design and protocol development and revised  
22  
23 478 manuscript drafts. RU contributed to study design and study protocol, and revised manuscript  
24  
25 479 drafts. GMK devised study design and trial protocol, and revised drafts. ÉMF and SLG  
26  
27 480 developed study materials and liaised with REC and HRA regarding approvals. AM, JR,  
28  
29 481 FCZ, HH, EW, and MW contributed to the revision of the manuscript and validation of  
30  
31 482 operating procedures and mechanistic protocols. RU and GMK co-lead the MRC grant that  
32  
33 483 funds the PIMS trial and provide overall supervision and oversight for the project.  
34  
35  
36

37 484

38  
39  
40 485 **FUNDING STATEMENT**

41  
42 486 The PIMS trial is funded by a Medical Research Council (MRC) grant to RU and GMK;  
43  
44 487 Grant Ref: MR/S037675/1. ÉMF is supported by an MRC Integrative Epidemiology Unit  
45  
46 488 PhD Studentship. AM is supported by funding from the MRC for doctoral training  
47  
48 489 (MR/2434208). FCZ receives a PhD Fellowship from the São Paulo Research Foundation  
49  
50 490 (2019/13229-2 and 2021/07448-3). HH is supported by the PIMS Trial MRC grant  
51  
52 491 (MR/S037675/1). DJ is supported by the Cambridge Arthritis Research Endeavour and the  
53  
54 492 National Institute for Health Research (NIHR) Cambridge Biomedical Research Centre  
55  
56 493 (BRC-1215-20014). NMB acknowledges funding support from the MRC (MR/R006008/1  
57  
58  
59  
60

1  
2  
3 494 and MR/N019016/1), Ministry of Defence (702931454), Diabetes UK (20/0006296), NIHR  
4  
5 495 (14/WM/0093), and Innovate UK (84361). RU has grants from MRC, NIHR: Health  
6  
7 496 Technology Assessment, European Commission - Research: The Seventh Framework  
8  
9 497 Programme, and personal fees from Sunovion, outside the submitted work. GMK  
10  
11 498 acknowledges funding support from the Wellcome Trust (Grant No. 201486/Z/16/Z), the  
12  
13 499 Medical Research Council, UK (Grant No. MC\_UU\_00011/1; Grant No. MR/S037675/1; and  
14  
15 500 Grant No. MR/W014416/1), and the National Institute of Health Research Bristol Biomedical  
16  
17 501 Research Centre, UK (Grant No. NIHR203315). The funders had no role in the design of this  
18  
19 502 study.  
20  
21  
22  
23  
24  
25

#### 26 504 COMPETING INTERESTS STATEMENT

27  
28 505 ÉMF, SLG, AM, JR, FCZ, HH, EW, MW, MK, GKM, BD, DJ, JS, RU, and GMK have no  
29  
30 506 conflicts of interest to report. NMB holds shares and is a Director of Celentyx Ltd.  
31  
32  
33  
34

#### 35 508 PIMS COLLABORATION

36  
37 509 Members of the PIMS Collaboration include Golam Khandaker, Rachel Upthegrove, Alice  
38  
39 510 Egerton, Anthony David, Bill Deakin, Carmine Pariante, David Cotter, Ed Bullmore, Eva  
40  
41 511 Meisenzahl, Gary Donohoe, Georgios Gkoutos, Jack Rogers, James MacCabe, Joanna Neill,  
42  
43 512 John Suckling, Neil Harrison, Nicholas Barnes, Nikos Koutsouleris, Paola Dazzan, Peter  
44  
45 513 Jones, Stephen Burgess, Stephen Wood, Valeria Mondelli.  
46  
47  
48  
49  
50

#### 51 515 REFERENCES

52  
53  
54 516 1 Khandaker GM, Cousins L, Deakin J, *et al.* Inflammation and immunity in schizophrenia:  
55 517 implications for pathophysiology and treatment. *Lancet Psychiatry* 2015;**2**:258–70.  
56 518 doi:10.1016/S2215-0366(14)00122-9  
57  
58  
59  
60

- 1  
2  
3 519 2 Khandaker GM, Dantzer R. Is there a role for immune-to-brain communication in  
4 520 schizophrenia? *Psychopharmacology* 2016;**233**:1559–73. doi:10.1007/s00213-015-3975-  
5 521 1
- 7 522 3 Khandaker GM, Dantzer R, Jones PB. Immunopsychiatry: important facts. *Psychol Med*  
8 523 2017;**47**:2229–37. doi:10.1017/S0033291717000745
- 11 524 4 Upthegrove R, Khandaker G. Cytokines, Oxidative Stress and Cellular Markers of  
12 525 Inflammation in Schizophrenia. *Current topics in behavioral neurosciences* 2020;**44**:49–  
13 526 66. doi:10.1007/7854\_2018\_88
- 15 527 5 Upthegrove R, Manzanares-Teson N, Barnes NM. Cytokine function in medication-naive  
16 528 first episode psychosis: a systematic review and meta-analysis. *Schizophr Res*  
17 529 2014;**155**:101–8. doi:10.1016/j.schres.2014.03.005
- 20 530 6 Goldsmith DR, Rapaport MH, Miller BJ. A meta-analysis of blood cytokine network  
21 531 alterations in psychiatric patients: comparisons between schizophrenia, bipolar disorder  
22 532 and depression. *Mol Psychiatry* 2016;**21**:1696–709. doi:10.1038/mp.2016.3
- 24 533 7 Miller BJ, Buckley P, Seabolt W, *et al.* Meta-analysis of cytokine alterations in  
25 534 schizophrenia: clinical status and antipsychotic effects. *Biological psychiatry*  
26 535 2011;**70**:663–71. doi:10.1016/j.biopsych.2011.04.013
- 28 536 8 Potvin S, Stip E, Sepehry AA, *et al.* Inflammatory cytokine alterations in schizophrenia: a  
29 537 systematic quantitative review. *Biol Psychiatry* 2008;**63**:801–8.  
30 538 doi:10.1016/j.biopsych.2007.09.024
- 33 539 9 Wang AK, Miller BJ. Meta-analysis of Cerebrospinal Fluid Cytokine and Tryptophan  
34 540 Catabolite Alterations in Psychiatric Patients: Comparisons Between Schizophrenia,  
35 541 Bipolar Disorder, and Depression. *Schizophr Bull* 2018;**44**:75–83.  
36 542 doi:10.1093/schbul/sbx035
- 38 543 10 Khandaker GM, Zimbron J, Dalman C, *et al.* Childhood infection and adult  
39 544 schizophrenia: a meta-analysis of population-based studies. *Schizophr Res*  
40 545 2012;**139**:161–8. doi:10.1016/j.schres.2012.05.023
- 43 546 11 Khandaker GM, Zimbron J, Lewis G, *et al.* Prenatal maternal infection,  
44 547 neurodevelopment and adult schizophrenia: a systematic review of population-based  
45 548 studies. *Psychol Med* 2013;**43**:239–57. doi:10.1017/S0033291712000736
- 47 549 12 Khandaker GM, Zammit S, Burgess S, *et al.* Association between a functional interleukin  
48 550 6 receptor genetic variant and risk of depression and psychosis in a population-based  
49 551 birth cohort. *Brain Behav Immun* 2018;**69**:264–72. doi:10.1016/j.bbi.2017.11.020
- 52 552 13 Perry BI, Upthegrove R, Kappelmann N, *et al.* Associations of immunological  
53 553 proteins/traits with schizophrenia, major depression and bipolar disorder: A bi-directional  
54 554 two-sample mendelian randomization study. *Brain, Behavior, and Immunity*  
55 555 2021;**97**:176–85. doi:10.1016/j.bbi.2021.07.009
- 57 556 14 Williams JA, Burgess S, Suckling J, *et al.* Inflammation and Brain Structure in  
58 557 Schizophrenia and Other Neuropsychiatric Disorders: A Mendelian Randomization  
59 558 Study. *JAMA Psychiatry* 2022;**79**:498. doi:10.1001/jamapsychiatry.2022.0407



- 1  
2  
3 559 15 Kose M, Pariante CM, Dazzan P, *et al.* The Role of Peripheral Inflammation in Clinical  
4 560 Outcome and Brain Imaging Abnormalities in Psychosis: A Systematic Review. *Front*  
5 561 *Psychiatry* 2021;**12**:612471. doi:10.3389/fpsyt.2021.612471  
6  
7 562 16 Lesh TA, Careaga M, Rose DR, *et al.* Cytokine alterations in first-episode schizophrenia  
8 563 and bipolar disorder: relationships to brain structure and symptoms. *Journal of*  
9 564 *Neuroinflammation* 2018;**15**:165. doi:10.1186/s12974-018-1197-2  
10  
11 565 17 Trépanier MO, Hopperton KE, Mizrahi R, *et al.* Postmortem evidence of cerebral  
12 566 inflammation in schizophrenia: a systematic review. *Mol Psychiatry* 2016;**21**:1009–26.  
13 567 doi:10.1038/mp.2016.90  
14  
15 568 18 van Kesteren CFMG, Gremmels H, de Witte LD, *et al.* Immune involvement in the  
16 569 pathogenesis of schizophrenia: a meta-analysis on postmortem brain studies. *Transl*  
17 570 *Psychiatry* 2017;**7**:e1075–e1075. doi:10.1038/tp.2017.4  
18  
19 571 19 Marques TR, Ashok AH, Pillinger T, *et al.* Neuroinflammation in schizophrenia: meta-  
20 572 analysis of in vivo microglial imaging studies. *Psychological Medicine* 2019;**49**:2186–96.  
21 573 doi:10.1017/S0033291718003057  
22  
23 574 20 Murray AJ, Rogers JC, Katshu MZUH, *et al.* Oxidative Stress and the Pathophysiology  
24 575 and Symptom Profile of Schizophrenia Spectrum Disorders. *Frontiers in Psychiatry*  
25 576 2021;**12**.<https://www.frontiersin.org/articles/10.3389/fpsyt.2021.703452> (accessed 9 Aug  
26 577 2022).  
27  
28 578 21 Upthegrove R. The immune system and schizophrenia: An update for clinicians.  
29 579 *Advances in Psychiatric Treatment* 2014;**20**:83–91. doi:10.1192/apt.bp.113.011452  
30  
31 580 22 Conen S, Gregory CJ, Hinz R, *et al.* Neuroinflammation as measured by positron  
32 581 emission tomography in patients with recent onset and established schizophrenia:  
33 582 implications for immune pathogenesis. *Mol Psychiatry* 2021;**26**:5398–406.  
34 583 doi:10.1038/s41380-020-0829-y  
35  
36 584 23 van Mierlo HC, Schot A, Boks MPM, *et al.* The association between schizophrenia and  
37 585 the immune system: Review of the evidence from unbiased ‘omic-studies.’ *Schizophrenia*  
38 586 *Research* 2020;**217**:114–23. doi:10.1016/j.schres.2019.05.028  
39  
40 587 24 Plavén-Sigray P, Matheson GJ, Collste K, *et al.* Positron Emission Tomography Studies  
41 588 of the Glial Cell Marker Translocator Protein in Patients With Psychosis: A Meta-  
42 589 analysis Using Individual Participant Data. *Biological Psychiatry* 2018;**84**:433–42.  
43 590 doi:10.1016/j.biopsych.2018.02.1171  
44  
45 591 25 Plavén-Sigray P, Matheson GJ, Coughlin JM, *et al.* Meta-analysis of the Glial Marker  
46 592 TSPO in Psychosis Revisited: Reconciling Inconclusive Findings of Patient-Control  
47 593 Differences. *Biol Psychiatry* 2021;**89**:e5–8. doi:10.1016/j.biopsych.2020.05.028  
48  
49 594 26 Deakin B, Suckling J, Barnes TRE, *et al.* The benefit of minocycline on negative  
50 595 symptoms of schizophrenia in patients with recent-onset psychosis (BeneMin): a  
51 596 randomised, double-blind, placebo-controlled trial. *The Lancet Psychiatry* 2018;**5**:885–  
52 597 94. doi:10.1016/S2215-0366(18)30345-6  
53  
54  
55  
56  
57  
58  
59  
60



- 1  
2  
3 598 27 Weiser M, Levi L, Burshtein S, *et al.* The effect of minocycline on symptoms in  
4 599 schizophrenia: Results from a randomized controlled trial. *Schizophrenia Research*  
5 600 2019;**206**:325–32. doi:10.1016/j.schres.2018.10.023  
6  
7 601 28 Ramaker RC, Bowling KM, Lasseigne BN, *et al.* Post-mortem molecular profiling of  
8 602 three psychiatric disorders. *Genome Medicine* 2017;**9**:72. doi:10.1186/s13073-017-0458-  
9 603 5  
10  
11 604 29 González-Peñas J, Costas J, Villamayor MJG, *et al.* Enrichment of rare genetic variants  
12 605 in astrocyte gene enriched co-expression modules altered in postmortem brain samples of  
13 606 schizophrenia. *Neurobiology of Disease* 2019;**121**:305–14.  
14 607 doi:10.1016/j.nbd.2018.10.013  
15  
16 608 30 Gandal MJ, Zhang P, Hadjimichael E, *et al.* Transcriptome-wide isoform-level  
17 609 dysregulation in ASD, schizophrenia, and bipolar disorder. *Science* 2018;**362**:eaat8127.  
18 610 doi:10.1126/science.aat8127  
19  
20 611 31 Gandal MJ, Haney JR, Parikshak NN, *et al.* Shared molecular neuropathology across  
21 612 major psychiatric disorders parallels polygenic overlap. *Science* 2018;**359**:693–7.  
22 613 doi:10.1126/science.aad6469  
23  
24 614 32 Toker L, Mancarci BO, Tripathy S, *et al.* Transcriptomic Evidence for Alterations in  
25 615 Astrocytes and Parvalbumin Interneurons in Subjects With Bipolar Disorder and  
26 616 Schizophrenia. *Biological Psychiatry* 2018;**84**:787–96.  
27 617 doi:10.1016/j.biopsych.2018.07.010  
28  
29 618 33 Corsi-Zuelli F, Deakin B. Impaired regulatory T cell control of astroglial overdrive and  
30 619 microglial pruning in schizophrenia. *Neuroscience & Biobehavioral Reviews*  
31 620 2021;**125**:637–53. doi:10.1016/j.neubiorev.2021.03.004  
32  
33 621 34 Corsi-Zuelli F, Deakin B, de Lima MHF, *et al.* T regulatory cells as a potential  
34 622 therapeutic target in psychosis? Current challenges and future perspectives. *Brain,*  
35 623 *Behavior, & Immunity - Health* 2021;**17**:100330. doi:10.1016/j.bbih.2021.100330  
36  
37 624 35 Jeppesen R, Christensen RHB, Pedersen EMJ, *et al.* Efficacy and safety of anti-  
38 625 inflammatory agents in treatment of psychotic disorders – A comprehensive systematic  
39 626 review and meta-analysis. *Brain, Behavior, and Immunity* 2020;**90**:364–80.  
40 627 doi:10.1016/j.bbi.2020.08.028  
41  
42 628 36 Girgis RR, Ciarleglio A, Choo T, *et al.* A Randomized, Double-Blind, Placebo-  
43 629 Controlled Clinical Trial of Tocilizumab, An Interleukin-6 Receptor Antibody, For  
44 630 Residual Symptoms in Schizophrenia. *Neuropsychopharmacology : official publication*  
45 631 *of the American College of Neuropsychopharmacology* 2018;**43**:1317–23.  
46 632 doi:10.1038/npp.2017.258  
47  
48 633 37 Mondelli V, Ciufolini S, Belvederi Murri M, *et al.* Cortisol and Inflammatory Biomarkers  
49 634 Predict Poor Treatment Response in First Episode Psychosis. *Schizophrenia bulletin*  
50 635 2015;**41**:1162–70. doi:10.1093/schbul/sbv028  
51  
52 636 38 Miller BJ, Culpepper N, Rapaport MH. C-reactive protein levels in schizophrenia: a  
53 637 review and meta-analysis. *Clinical schizophrenia & related psychoses* 2014;**7**:223–30.  
54 638 doi:10.3371/CSRP.MICU.020813

- 1  
2  
3 639 39 Raison CL, Rutherford RE, Woolwine BJ, *et al.* A randomized controlled trial of the  
4 640 tumor necrosis factor antagonist infliximab for treatment-resistant depression: The role of  
5 641 baseline inflammatory biomarkers. *JAMA Psychiatry* 2013;**70**:31–41.  
6 642 doi:10.1001/2013.jamapsychiatry.4
- 7  
8  
9 643 40 Dunleavy C, Elsworth RJ, Upthegrove R, *et al.* Inflammation in first-episode psychosis:  
10 644 The contribution of inflammatory biomarkers to the emergence of negative symptoms, a  
11 645 systematic review and meta-analysis. *Acta Psychiatrica Scandinavica* 2022;**146**:6–20.  
12 646 doi:10.1111/acps.13416
- 13  
14 647 41 Khandaker GM, Stochl J, Zammit S, *et al.* Association between circulating levels of C-  
15 648 reactive protein and positive and negative symptoms of psychosis in adolescents in a  
16 649 general population birth cohort. *J Psychiatr Res* 2021;**143**:534–42.  
17 650 doi:10.1016/j.jpsychires.2020.11.028
- 18  
19  
20 651 42 Edwards CJ, Cella M, Tarrier N, *et al.* Investigating the empirical support for therapeutic  
21 652 targets proposed by the temporal experience of pleasure model in schizophrenia: A  
22 653 systematic review. *Schizophrenia research* 2015;**168**:120–44.  
23 654 doi:10.1016/j.schres.2015.08.013
- 24  
25 655 43 Lalouis PA, Schmaal L, Wood SJ, *et al.* Neurobiologically Based Stratification of  
26 656 Recent-Onset Depression and Psychosis: Identification of Two Distinct Transdiagnostic  
27 657 Phenotypes. *Biological Psychiatry* 2022;:S0006322322011568.  
28 658 doi:10.1016/j.biopsych.2022.03.021
- 29  
30  
31 659 44 Fioravanti M, Carlone O, Vitale B, *et al.* A Meta-Analysis of Cognitive Deficits in Adults  
32 660 with a Diagnosis of Schizophrenia. *Neuropsychol Rev* 2005;**15**:73–95.  
33 661 doi:10.1007/s11065-005-6254-9
- 34  
35 662 45 Keefe RSE, Bilder RM, Davis SM, *et al.* Neurocognitive Effects of Antipsychotic  
36 663 Medications in Patients With Chronic Schizophrenia in the CATIE Trial. *Archives of*  
37 664 *General Psychiatry* 2007;**64**:633–47. doi:10.1001/archpsyc.64.6.633
- 38  
39  
40 665 46 Chan A-W, Tetzlaff JM, Altman DG, *et al.* SPIRIT 2013 Statement: defining standard  
41 666 protocol items for clinical trials. *Rev Panam Salud Publica* 2015;**38**:506–14.
- 42  
43 667 47 Calabrese LH, Rose-John S. IL-6 biology: implications for clinical targeting in rheumatic  
44 668 disease. *Nature reviews Rheumatology* 2014;**10**:720–7. doi:10.1038/nrrheum.2014.127
- 45  
46 669 48 Choy EHS, Isenberg DA, Garrood T, *et al.* Therapeutic benefit of blocking interleukin-6  
47 670 activity with an anti-interleukin-6 receptor monoclonal antibody in rheumatoid arthritis:  
48 671 a randomized, double-blind, placebo-controlled, dose-escalation trial. *Arthritis and*  
49 672 *rheumatism* 2002;**46**:3143–50. doi:10.1002/art.10623
- 50  
51  
52 673 49 Woo P, Wilkinson N, Prieur A-M, *et al.* Open label phase II trial of single, ascending  
53 674 doses of MRA in Caucasian children with severe systemic juvenile idiopathic arthritis:  
54 675 proof of principle of the efficacy of IL-6 receptor blockade in this type of arthritis and  
55 676 demonstration of prolonged clinical improvement. *Arthritis research & therapy*  
56 677 2005;**7**:R1281-8. doi:10.1186/ar1826
- 57  
58  
59  
60

1  
2  
3 678 50 Gard DE, Gard MG, Kring AM, *et al.* Anticipatory and consummatory components of the  
4 679 experience of pleasure: A scale development study. *Journal of Research in Personality*  
5 680 2006;**40**:1086–102. doi:10.1016/j.jrp.2005.11.001  
6  
7  
8 681  
9  
10 682  
11  
12  
13  
14  
15  
16  
17  
18  
19  
20  
21  
22  
23  
24  
25  
26  
27  
28  
29  
30  
31  
32  
33  
34  
35  
36  
37  
38  
39  
40  
41  
42  
43  
44  
45  
46  
47  
48  
49  
50  
51  
52  
53  
54  
55  
56  
57  
58  
59  
60

For peer review only

1  
2  
3  
4  
5  
6  
7  
8  
9  
10  
11  
12  
13  
14  
15  
16  
17  
18  
19  
20  
21  
22  
23  
24  
25  
26  
27  
28  
29  
30  
31  
32  
33  
34  
35  
36  
37  
38  
39  
40  
41  
42  
43  
44  
45  
46  
47  
48  
49  
50  
51  
52  
53  
54  
55  
56  
57  
58  
59  
60

683 FIGURE LEGEND

684 Figure 1. Overview of study design

For peer review only



Figure 1. Overview of study design

240x165mm (144 x 144 DPI)

**Supplementary Material**

**Foley et al. Protocol for the Psychosis Immune Mechanism Stratified Medicine (PIMS) trial: A randomised double-blind placebo-controlled trial of single dose tocilizumab in patients with psychosis.**

Table of Contents

eTable1: SPIRIT 2013 Checklist..... 2

Appendix I – Consent Form for Screening: All Participants..... 8

Appendix II – Informed Consent Form for Study Participation: Patients ..... 10

Appendix III – Informed Consent Form for Study Participation: Healthy Controls..... 13

For peer review only

**eTable1:** SPIRIT 2013 Checklist – Recommended items to address in a clinical trial protocol and related documents\*

| Section/item                      | Item No | Description                                                                                                                                                                                                                                                                              | Addressed on page number  |
|-----------------------------------|---------|------------------------------------------------------------------------------------------------------------------------------------------------------------------------------------------------------------------------------------------------------------------------------------------|---------------------------|
| <b>Administrative information</b> |         |                                                                                                                                                                                                                                                                                          |                           |
| Title                             | 1       | Descriptive title identifying the study design, population, interventions, and, if applicable, trial acronym                                                                                                                                                                             | 1                         |
| Trial registration                | 2a      | Trial identifier and registry name. If not yet registered, name of intended registry                                                                                                                                                                                                     | 4                         |
|                                   | 2b      | All items from the World Health Organization Trial Registration Data Set                                                                                                                                                                                                                 | 4<br>(ISRCTN<br>23256704) |
| Protocol version                  | 3       | Date and version identifier                                                                                                                                                                                                                                                              | -                         |
| Funding                           | 4       | Sources and types of financial, material, and other support                                                                                                                                                                                                                              | 24 - 25                   |
| Roles and responsibilities        | 5a      | Names, affiliations, and roles of protocol contributors                                                                                                                                                                                                                                  | 1, 24                     |
|                                   | 5b      | Name and contact information for the trial sponsor                                                                                                                                                                                                                                       | 23                        |
|                                   | 5c      | Role of study sponsor and funders, if any, in study design; collection, management, analysis, and interpretation of data; writing of the report; and the decision to submit the report for publication, including whether they will have ultimate authority over any of these activities | 23-25                     |

|    |                                                           |     |                                                                                                                                                                                                                                                                  |                         |
|----|-----------------------------------------------------------|-----|------------------------------------------------------------------------------------------------------------------------------------------------------------------------------------------------------------------------------------------------------------------|-------------------------|
| 1  |                                                           | 5d  | Composition, roles, and responsibilities of the coordinating centre, steering committee, endpoint adjudication committee, data management team, and other individuals or groups overseeing the trial, if applicable (see Item 21a for data monitoring committee) | 23 - 25                 |
| 2  |                                                           |     |                                                                                                                                                                                                                                                                  |                         |
| 3  |                                                           |     |                                                                                                                                                                                                                                                                  |                         |
| 4  |                                                           |     |                                                                                                                                                                                                                                                                  |                         |
| 5  |                                                           |     |                                                                                                                                                                                                                                                                  |                         |
| 6  |                                                           |     |                                                                                                                                                                                                                                                                  |                         |
| 7  |                                                           |     |                                                                                                                                                                                                                                                                  |                         |
| 8  |                                                           |     |                                                                                                                                                                                                                                                                  |                         |
| 9  | <b>Introduction</b>                                       |     |                                                                                                                                                                                                                                                                  |                         |
| 10 |                                                           |     |                                                                                                                                                                                                                                                                  |                         |
| 11 | Background and rationale                                  | 6a  | Description of research question and justification for undertaking the trial, including summary of relevant studies (published and unpublished) examining benefits and harms for each intervention                                                               | 6-9                     |
| 12 |                                                           |     |                                                                                                                                                                                                                                                                  |                         |
| 13 |                                                           | 6b  | Explanation for choice of comparators                                                                                                                                                                                                                            | 6-9                     |
| 14 |                                                           |     |                                                                                                                                                                                                                                                                  |                         |
| 15 | Objectives                                                | 7   | Specific objectives or hypotheses                                                                                                                                                                                                                                | 9-10                    |
| 16 |                                                           |     |                                                                                                                                                                                                                                                                  |                         |
| 17 | Trial design                                              | 8   | Description of trial design including type of trial (eg, parallel group, crossover, factorial, single group), allocation ratio, and framework (eg, superiority, equivalence, noninferiority, exploratory)                                                        | 9                       |
| 18 |                                                           |     |                                                                                                                                                                                                                                                                  |                         |
| 19 |                                                           |     |                                                                                                                                                                                                                                                                  |                         |
| 20 |                                                           |     |                                                                                                                                                                                                                                                                  |                         |
| 21 |                                                           |     |                                                                                                                                                                                                                                                                  |                         |
| 22 | <b>Methods: Participants, interventions, and outcomes</b> |     |                                                                                                                                                                                                                                                                  |                         |
| 23 |                                                           |     |                                                                                                                                                                                                                                                                  |                         |
| 24 | Study setting                                             | 9   | Description of study settings (e.g., community clinic, academic hospital) and list of countries where data will be collected. Reference to where list of study sites can be obtained                                                                             | 9, 11                   |
| 25 |                                                           |     |                                                                                                                                                                                                                                                                  |                         |
| 26 | Eligibility criteria                                      | 10  | Inclusion and exclusion criteria for participants. If applicable, eligibility criteria for study centres and individuals who will perform the interventions (eg, surgeons, psychotherapists)                                                                     | 12, Table 1             |
| 27 |                                                           |     |                                                                                                                                                                                                                                                                  |                         |
| 28 | Interventions                                             | 11a | Interventions for each group with sufficient detail to allow replication, including how and when they will be administered                                                                                                                                       | 11, 19, 21-22, Figure 1 |
| 29 |                                                           |     |                                                                                                                                                                                                                                                                  |                         |
| 30 |                                                           | 11b | Criteria for discontinuing or modifying allocated interventions for a given trial participant (eg, drug dose change in response to harms, participant request, or improving/worsening disease)                                                                   | 22                      |
| 31 |                                                           |     |                                                                                                                                                                                                                                                                  |                         |
| 32 |                                                           | 11c | Strategies to improve adherence to intervention protocols, and any procedures for monitoring adherence (eg, drug tablet return, laboratory tests)                                                                                                                | -                       |
| 33 |                                                           |     |                                                                                                                                                                                                                                                                  |                         |
| 34 |                                                           | 11d | Relevant concomitant care and interventions that are permitted or prohibited during the trial                                                                                                                                                                    | 12, Table 1             |
| 35 |                                                           |     |                                                                                                                                                                                                                                                                  |                         |
| 36 |                                                           |     |                                                                                                                                                                                                                                                                  |                         |
| 37 |                                                           |     |                                                                                                                                                                                                                                                                  |                         |
| 38 |                                                           |     |                                                                                                                                                                                                                                                                  |                         |
| 39 |                                                           |     |                                                                                                                                                                                                                                                                  |                         |
| 40 |                                                           |     |                                                                                                                                                                                                                                                                  |                         |
| 41 |                                                           |     |                                                                                                                                                                                                                                                                  |                         |
| 42 |                                                           |     |                                                                                                                                                                                                                                                                  |                         |



|    |                                                                     |     |                                                                                                                                                                                                                                                                                                                                                                                |                         |
|----|---------------------------------------------------------------------|-----|--------------------------------------------------------------------------------------------------------------------------------------------------------------------------------------------------------------------------------------------------------------------------------------------------------------------------------------------------------------------------------|-------------------------|
| 1  | Outcomes                                                            | 12  | Primary, secondary, and other outcomes, including the specific measurement variable (eg, systolic blood pressure), analysis metric (eg, change from baseline, final value, time to event), method of aggregation (eg, median, proportion), and time point for each outcome. Explanation of the clinical relevance of chosen efficacy and harm outcomes is strongly recommended | 9-10, Figure 1, Table 2 |
| 2  |                                                                     |     |                                                                                                                                                                                                                                                                                                                                                                                |                         |
| 3  |                                                                     |     |                                                                                                                                                                                                                                                                                                                                                                                |                         |
| 4  |                                                                     |     |                                                                                                                                                                                                                                                                                                                                                                                |                         |
| 5  |                                                                     |     |                                                                                                                                                                                                                                                                                                                                                                                |                         |
| 6  | Participant timeline                                                | 13  | Time schedule of enrolment, interventions (including any run-ins and washouts), assessments, and visits for participants. A schematic diagram is highly recommended (see Figure)                                                                                                                                                                                               | 18-19, Figure 1         |
| 7  |                                                                     |     |                                                                                                                                                                                                                                                                                                                                                                                |                         |
| 8  |                                                                     |     |                                                                                                                                                                                                                                                                                                                                                                                |                         |
| 9  | Sample size                                                         | 14  | Estimated number of participants needed to achieve study objectives and how it was determined, including clinical and statistical assumptions supporting any sample size calculations                                                                                                                                                                                          | 17                      |
| 10 |                                                                     |     |                                                                                                                                                                                                                                                                                                                                                                                |                         |
| 11 |                                                                     |     |                                                                                                                                                                                                                                                                                                                                                                                |                         |
| 12 |                                                                     |     |                                                                                                                                                                                                                                                                                                                                                                                |                         |
| 13 | Recruitment                                                         | 15  | Strategies for achieving adequate participant enrolment to reach target sample size                                                                                                                                                                                                                                                                                            | 18                      |
| 14 |                                                                     |     |                                                                                                                                                                                                                                                                                                                                                                                |                         |
| 15 | <b>Methods: Assignment of interventions (for controlled trials)</b> |     |                                                                                                                                                                                                                                                                                                                                                                                |                         |
| 16 | <b>Allocation:</b>                                                  |     |                                                                                                                                                                                                                                                                                                                                                                                |                         |
| 17 |                                                                     |     |                                                                                                                                                                                                                                                                                                                                                                                |                         |
| 18 | Sequence generation                                                 | 16a | Method of generating the allocation sequence (eg, computer-generated random numbers), and list of any factors for stratification. To reduce predictability of a random sequence, details of any planned restriction (eg, blocking) should be provided in a separate document that is unavailable to those who enrol participants or assign interventions                       | 17                      |
| 19 |                                                                     |     |                                                                                                                                                                                                                                                                                                                                                                                |                         |
| 20 |                                                                     |     |                                                                                                                                                                                                                                                                                                                                                                                |                         |
| 21 |                                                                     |     |                                                                                                                                                                                                                                                                                                                                                                                |                         |
| 22 |                                                                     |     |                                                                                                                                                                                                                                                                                                                                                                                |                         |
| 23 |                                                                     |     |                                                                                                                                                                                                                                                                                                                                                                                |                         |
| 24 |                                                                     |     |                                                                                                                                                                                                                                                                                                                                                                                |                         |
| 25 | Allocation concealment mechanism                                    | 16b | Mechanism of implementing the allocation sequence (eg, central telephone; sequentially numbered, opaque, sealed envelopes), describing any steps to conceal the sequence until interventions are assigned                                                                                                                                                                      | 17                      |
| 26 |                                                                     |     |                                                                                                                                                                                                                                                                                                                                                                                |                         |
| 27 |                                                                     |     |                                                                                                                                                                                                                                                                                                                                                                                |                         |
| 28 |                                                                     |     |                                                                                                                                                                                                                                                                                                                                                                                |                         |
| 29 | Implementation                                                      | 16c | Who will generate the allocation sequence, who will enrol participants, and who will assign participants to interventions                                                                                                                                                                                                                                                      | 17                      |
| 30 |                                                                     |     |                                                                                                                                                                                                                                                                                                                                                                                |                         |
| 31 |                                                                     |     |                                                                                                                                                                                                                                                                                                                                                                                |                         |
| 32 |                                                                     |     |                                                                                                                                                                                                                                                                                                                                                                                |                         |
| 33 | Blinding (masking)                                                  | 17a | Who will be blinded after assignment to interventions (eg, trial participants, care providers, outcome assessors, data analysts), and how                                                                                                                                                                                                                                      | 17                      |
| 34 |                                                                     |     |                                                                                                                                                                                                                                                                                                                                                                                |                         |
| 35 |                                                                     |     |                                                                                                                                                                                                                                                                                                                                                                                |                         |
| 36 |                                                                     | 17b | If blinded, circumstances under which unblinding is permissible, and procedure for revealing a participant's allocated intervention during the trial                                                                                                                                                                                                                           | 22                      |
| 37 |                                                                     |     |                                                                                                                                                                                                                                                                                                                                                                                |                         |
| 38 |                                                                     |     |                                                                                                                                                                                                                                                                                                                                                                                |                         |
| 39 |                                                                     |     |                                                                                                                                                                                                                                                                                                                                                                                |                         |
| 40 |                                                                     |     |                                                                                                                                                                                                                                                                                                                                                                                |                         |
| 41 |                                                                     |     |                                                                                                                                                                                                                                                                                                                                                                                |                         |
| 42 |                                                                     |     |                                                                                                                                                                                                                                                                                                                                                                                |                         |
| 43 |                                                                     |     |                                                                                                                                                                                                                                                                                                                                                                                |                         |
| 44 |                                                                     |     |                                                                                                                                                                                                                                                                                                                                                                                |                         |
| 45 |                                                                     |     |                                                                                                                                                                                                                                                                                                                                                                                |                         |
| 46 |                                                                     |     |                                                                                                                                                                                                                                                                                                                                                                                |                         |

1  
2  
3  
4  
5  
6  
7  
8  
9  
10  
11  
12  
13  
14  
15  
16  
17  
18  
19  
20  
21  
22  
23  
24  
25  
26  
27  
28  
29  
30  
31  
32  
33  
34  
35  
36  
37  
38  
39  
40  
41  
42  
43  
44  
45  
46**Methods: Data collection, management, and analysis**

|                            |     |                                                                                                                                                                                                                                                                                                                                                                                                              |                       |
|----------------------------|-----|--------------------------------------------------------------------------------------------------------------------------------------------------------------------------------------------------------------------------------------------------------------------------------------------------------------------------------------------------------------------------------------------------------------|-----------------------|
| Data collection methods    | 18a | Plans for assessment and collection of outcome, baseline, and other trial data, including any related processes to promote data quality (eg, duplicate measurements, training of assessors) and a description of study instruments (eg, questionnaires, laboratory tests) along with their reliability and validity, if known. Reference to where data collection forms can be found, if not in the protocol | 10-15, 18-19, Table 2 |
|                            | 18b | Plans to promote participant retention and complete follow-up, including list of any outcome data to be collected for participants who discontinue or deviate from intervention protocols                                                                                                                                                                                                                    | 17-18                 |
| Data management            | 19  | Plans for data entry, coding, security, and storage, including any related processes to promote data quality (eg, double data entry; range checks for data values). Reference to where details of data management procedures can be found, if not in the protocol                                                                                                                                            | 23-24                 |
| Statistical methods        | 20a | Statistical methods for analysing primary and secondary outcomes. Reference to where other details of the statistical analysis plan can be found, if not in the protocol                                                                                                                                                                                                                                     | 17-18                 |
|                            | 20b | Methods for any additional analyses (eg, subgroup and adjusted analyses)                                                                                                                                                                                                                                                                                                                                     | 17-18                 |
|                            | 20c | Definition of analysis population relating to protocol non-adherence (eg, as randomised analysis), and any statistical methods to handle missing data (eg, multiple imputation)                                                                                                                                                                                                                              | -                     |
| <b>Methods: Monitoring</b> |     |                                                                                                                                                                                                                                                                                                                                                                                                              |                       |
| Data monitoring            | 21a | Composition of data monitoring committee (DMC); summary of its role and reporting structure; statement of whether it is independent from the sponsor and competing interests; and reference to where further details about its charter can be found, if not in the protocol. Alternatively, an explanation of why a DMC is not needed                                                                        | 23                    |
|                            | 21b | Description of any interim analyses and stopping guidelines, including who will have access to these interim results and make the final decision to terminate the trial                                                                                                                                                                                                                                      | -                     |
| Harms                      | 22  | Plans for collecting, assessing, reporting, and managing solicited and spontaneously reported adverse events and other unintended effects of trial interventions or trial conduct                                                                                                                                                                                                                            | 20-22                 |

|    |                                 |     |                                                                                                                                                                                                                                                                                     |       |
|----|---------------------------------|-----|-------------------------------------------------------------------------------------------------------------------------------------------------------------------------------------------------------------------------------------------------------------------------------------|-------|
| 1  | Auditing                        | 23  | Frequency and procedures for auditing trial conduct, if any, and whether the process will be independent from investigators and the sponsor                                                                                                                                         | -     |
| 2  |                                 |     |                                                                                                                                                                                                                                                                                     |       |
| 3  |                                 |     |                                                                                                                                                                                                                                                                                     |       |
| 4  | <b>Ethics and dissemination</b> |     |                                                                                                                                                                                                                                                                                     |       |
| 5  |                                 |     |                                                                                                                                                                                                                                                                                     |       |
| 6  | Research ethics approval        | 24  | Plans for seeking research ethics committee/institutional review board (REC/IRB) approval                                                                                                                                                                                           | 22    |
| 7  |                                 |     |                                                                                                                                                                                                                                                                                     |       |
| 8  |                                 |     |                                                                                                                                                                                                                                                                                     |       |
| 9  | Protocol amendments             | 25  | Plans for communicating important protocol modifications (eg, changes to eligibility criteria, outcomes, analyses) to relevant parties (eg, investigators, REC/IRBs, trial participants, trial registries, journals, regulators)                                                    | 22    |
| 10 |                                 |     |                                                                                                                                                                                                                                                                                     |       |
| 11 |                                 |     |                                                                                                                                                                                                                                                                                     |       |
| 12 |                                 |     |                                                                                                                                                                                                                                                                                     |       |
| 13 |                                 |     |                                                                                                                                                                                                                                                                                     |       |
| 14 | Consent or assent               | 26a | Who will obtain informed consent or assent from potential trial participants or authorised surrogates, and how (see Item 32)                                                                                                                                                        | 22-23 |
| 15 |                                 |     |                                                                                                                                                                                                                                                                                     |       |
| 16 |                                 |     |                                                                                                                                                                                                                                                                                     |       |
| 17 |                                 | 26b | Additional consent provisions for collection and use of participant data and biological specimens in ancillary studies, if applicable                                                                                                                                               | 22-23 |
| 18 |                                 |     |                                                                                                                                                                                                                                                                                     |       |
| 19 |                                 |     |                                                                                                                                                                                                                                                                                     |       |
| 20 | Confidentiality                 | 27  | How personal information about potential and enrolled participants will be collected, shared, and maintained in order to protect confidentiality before, during, and after the trial                                                                                                | 23-24 |
| 21 |                                 |     |                                                                                                                                                                                                                                                                                     |       |
| 22 |                                 |     |                                                                                                                                                                                                                                                                                     |       |
| 23 |                                 |     |                                                                                                                                                                                                                                                                                     |       |
| 24 | Declaration of interests        | 28  | Financial and other competing interests for principal investigators for the overall trial and each study site                                                                                                                                                                       | 25    |
| 25 |                                 |     |                                                                                                                                                                                                                                                                                     |       |
| 26 |                                 |     |                                                                                                                                                                                                                                                                                     |       |
| 27 | Access to data                  | 29  | Statement of who will have access to the final trial dataset, and disclosure of contractual agreements that limit such access for investigators                                                                                                                                     | 23    |
| 28 |                                 |     |                                                                                                                                                                                                                                                                                     |       |
| 29 |                                 |     |                                                                                                                                                                                                                                                                                     |       |
| 30 | Ancillary and post-trial care   | 30  | Provisions, if any, for ancillary and post-trial care, and for compensation to those who suffer harm from trial participation                                                                                                                                                       | 22    |
| 31 |                                 |     |                                                                                                                                                                                                                                                                                     |       |
| 32 |                                 |     |                                                                                                                                                                                                                                                                                     |       |
| 33 | Dissemination policy            | 31a | Plans for investigators and sponsor to communicate trial results to participants, healthcare professionals, the public, and other relevant groups (eg, via publication, reporting in results databases, or other data sharing arrangements), including any publication restrictions | 24    |
| 34 |                                 |     |                                                                                                                                                                                                                                                                                     |       |
| 35 |                                 |     |                                                                                                                                                                                                                                                                                     |       |
| 36 |                                 |     |                                                                                                                                                                                                                                                                                     |       |
| 37 |                                 |     |                                                                                                                                                                                                                                                                                     |       |
| 38 |                                 | 31b | Authorship eligibility guidelines and any intended use of professional writers                                                                                                                                                                                                      | 24    |
| 39 |                                 |     |                                                                                                                                                                                                                                                                                     |       |
| 40 |                                 | 31c | Plans, if any, for granting public access to the full protocol, participant-level dataset, and statistical code                                                                                                                                                                     | -     |
| 41 |                                 |     |                                                                                                                                                                                                                                                                                     |       |
| 42 |                                 |     |                                                                                                                                                                                                                                                                                     |       |

|                            |    |                                                                                                                                                                                                |                        |
|----------------------------|----|------------------------------------------------------------------------------------------------------------------------------------------------------------------------------------------------|------------------------|
| <b>Appendices</b>          |    |                                                                                                                                                                                                |                        |
| Informed consent materials | 32 | Model consent form and other related documentation given to participants and authorised surrogates                                                                                             | Appendix I, II and III |
| Biological specimens       | 33 | Plans for collection, laboratory evaluation, and storage of biological specimens for genetic or molecular analysis in the current trial and for future use in ancillary studies, if applicable | 23-24                  |

\*It is strongly recommended that this checklist be read in conjunction with the SPIRIT 2013 Explanation & Elaboration for important clarification on the items. Amendments to the protocol should be tracked and dated. The SPIRIT checklist is copyrighted by the SPIRIT Group under the Creative Commons [“Attribution-NonCommercial-NoDerivs 3.0 Unported”](#) license.

## Appendix I – Consent Form for Screening: All Participants

### Informed Consent Form for Screening

REC No. 22/EE/0010, Date: 08.02.2022, Version: 1.2

### Psychosis Immune Mechanism Stratified Medicine Trial: The PIMS Trial

**PARTICIPANT ID:** \_\_\_\_\_

Thank you for considering taking part in the PIMS Trial. The research team must explain the eligibility assessment of the study to you before you agree to take part. If you have any questions arising from the Participant Information Sheet or from the explanation already given to you, please ask a member of the research team before you decide to participate. You will be given a copy of this Informed Consent Form to keep for future reference.

**Please read the statements below and insert your initial in the box next to each statement if you agree with them:**

| Statement                                                                                                                                                                                                                                                                                                                                                                | Initial Here |    |
|--------------------------------------------------------------------------------------------------------------------------------------------------------------------------------------------------------------------------------------------------------------------------------------------------------------------------------------------------------------------------|--------------|----|
| 1. I have read and understood the information sheet version XX, DD.MM.YYYY and have had the opportunity to ask questions.                                                                                                                                                                                                                                                |              |    |
| 2. I understand that my participation is voluntary and I am free to withdraw at any time without giving a reason, without my current or future medical care or legal rights being affected.                                                                                                                                                                              |              |    |
| 3. I agree to provide blood samples for eligibility screening. I understand my blood samples will be analysed to test for evidence of immune activation. The purposes and possible risks of donating these samples have been explained to me. I understand that donated samples will be considered a gift but I will have the right to withdraw permission for analysis. |              |    |
| 4. I agree that my GP can be told that I am participating in the eligibility assessment of the PIMS Trial, and can be informed if any unexpected results are found pertaining specifically to my health.                                                                                                                                                                 |              |    |
| 5. I consent for my GP/Psychiatrist to share information from my medical record in order to confirm my eligibility to take part in this study. The study team may access my GP/Psychiatrist records if necessary.                                                                                                                                                        |              |    |
| <i>Optional (Not agreeing to these will not exclude you from this study). Please tick Yes / No (as appropriate)</i>                                                                                                                                                                                                                                                      | Yes          | No |
| 6. I agree that the samples can be stored after completion of the screening analysis, for use in future, ethically approved, non-genetic studies, even if I am deemed non-eligible to partake in the PIMS study.                                                                                                                                                         |              |    |
| 7. I agree that data and samples can be stored after completion of the PIMS Trial for use in future, ethically approved, genetic studies. This includes the main stocks of any genetic material collected, such as DNA and RNA.                                                                                                                                          |              |    |

**If you want to participate in the screening session of the PIMS Trial, please sign your name below:**

Participant Signature \_\_\_\_\_

Participant Full Name \_\_\_\_\_

1  
2  
3  
4  
5 Date \_\_\_\_ / \_\_\_\_ / \_\_\_\_  
6  
7  
8  
9

10  
11 **The researcher who has explained this study to you also needs to sign this form:**  
12  
13

14  
15 Staff Signature \_\_\_\_\_  
16

17  
18 Staff Full Name \_\_\_\_\_  
19

20  
21 Date \_\_\_\_ / \_\_\_\_ / \_\_\_\_  
22  
23

24 **Thank you for your help.**  
25

26 By completing and returning this form, you are giving us your consent that the personal  
27 information you provide will be treated as strictly confidential and handled in accordance with  
28 the provisions of the UK Data Protection Act 2018.  
29

30 *\*When completed: 1 for participant; and 1 for researcher site file.*  
31  
32  
33  
34  
35  
36  
37  
38  
39  
40  
41  
42  
43  
44  
45  
46  
47  
48  
49  
50  
51  
52  
53  
54  
55  
56  
57  
58  
59  
60

## Appendix II – Informed Consent Form for Study Participation: Patients

### Informed Consent Form for Study Participation

REC No. 22/EE/0010, Date: 24.08.2022, Version: 1.5

### Psychosis Immune Mechanism Stratified Medicine Trial: The PIMS Trial

**PARTICIPANT ID:** \_\_\_\_\_

Thank you for taking part in the PIMS Trial eligibility assessment. Based on this assessment, you are eligible to take part in the PIMS Trial. Before you agree to take part, the research team must explain the study to you. If you have any questions arising from the Participant Information Sheet or from the explanation already given to you, please ask a member of the research team before you decide to participate. You will be given a copy of this Informed Consent Form to keep for future reference.

**Please read the statements below and insert your initial in the box next to each statement if you agree with them:**

| Statement                                                                                                                                                                                                                                                                                                                                                                                               | Initial Here |
|---------------------------------------------------------------------------------------------------------------------------------------------------------------------------------------------------------------------------------------------------------------------------------------------------------------------------------------------------------------------------------------------------------|--------------|
| 1. I have read and understood the information sheet version XX dated DD.MM.YYYY and have had the opportunity to ask questions.                                                                                                                                                                                                                                                                          |              |
| 2. I agree to take part in the PIMS Trial. I understand that my participation is voluntary and I am free to withdraw at any time without giving a reason, without my current or future medical care or legal rights being affected.                                                                                                                                                                     |              |
| 3. I understand that confidentiality and anonymity will be maintained and it will not be possible to identify me in any publications.                                                                                                                                                                                                                                                                   |              |
| 4. I agree to partake in interviews, complete questionnaires, and cognitive tests as part of this study. I understand what will happen during the study assessments.                                                                                                                                                                                                                                    |              |
| 5. I agree to provide blood samples. The purposes and possible risks of donating these samples have been explained to me. I understand that donated samples will be considered a gift but I will have the right to withdraw permission for analysis.                                                                                                                                                    |              |
| 6. I understand that blood samples collected from me will be used to measure non-genetic factors such as biochemical changes in the blood.                                                                                                                                                                                                                                                              |              |
| 7. I agree that the samples and information I provide can be stored, used and shared between PIMS Trial sites and with collaborators/contractors for the purpose of the study.                                                                                                                                                                                                                          |              |
| 8. I understand that blood samples collected will be stored at PIMS Trial centres.                                                                                                                                                                                                                                                                                                                      |              |
| 9. I understand that any of my samples (labelled with an anonymous ID only), or any information obtained from them, including the sequence of my genetic material, may be sent to specialist research laboratories in the UK and abroad for analyses and the results returned to PIMS Trial centres. Researchers at these laboratories have no access to personal information about study participants. |              |
| 10. I agree, if necessary, to provide blood/urine samples to test for pregnancy, COVID-19 immunity, Hepatitis B, Hepatitis C, HIV, VZV and Tuberculosis, and to undergo a chest X ray.                                                                                                                                                                                                                  |              |
| 11. I agree to being randomised into the tocilizumab or placebo group if deemed eligible to take part.                                                                                                                                                                                                                                                                                                  |              |

|                                                                                                                                                                                                                                                                                                                                        |     |    |
|----------------------------------------------------------------------------------------------------------------------------------------------------------------------------------------------------------------------------------------------------------------------------------------------------------------------------------------|-----|----|
| 12. I understand that taking part will involve the administration of a single intravenous infusion of the anti-inflammatory drug tocilizumab or normal saline.                                                                                                                                                                         |     |    |
| 13. I agree that my GP can be told that I am participating in this study, and about any findings that require further attention.                                                                                                                                                                                                       |     |    |
| 14. I understand that information related to my participation in this study may be accessed by responsible individuals from the sponsors of this study for quality control purposes. I give permission for these individuals to have access to this data.                                                                              |     |    |
| 15. I understand that relevant sections of my medical notes and data collected during the study, may be looked at by individuals from research team, from regulatory authorities or from the NHS Trust, where it is relevant to my taking part in this research. I give permission for these individuals to have access to my records. |     |    |
| <i>Optional (Not agreeing to these will not exclude you from this study). Please tick Yes / No (as appropriate)</i>                                                                                                                                                                                                                    | Yes | No |
| 16. I agree to undergo brain scans as part of the PIMS Trial.                                                                                                                                                                                                                                                                          |     |    |
| 17. I agree to be contacted in future by researchers to participate in follow up studies to this project, or in future studies of a similar nature.                                                                                                                                                                                    |     |    |
| 18. I understand that researchers may use the blood samples for genetic analysis.                                                                                                                                                                                                                                                      |     |    |
| 19. I agree that the samples can be stored after completion of the PIMS Trial for use in future, ethically approved, non-genetic studies.                                                                                                                                                                                              |     |    |
| 20. I agree that the information I give can be stored after completion of the PIMS Trial for use in future, ethically approved, non-genetic studies.                                                                                                                                                                                   |     |    |
| 21. I agree that data and samples can be stored after completion of the PIMS Trial for use in future, ethically approved, genetic studies. This includes the main stocks of any genetic material collected, such as DNA and RNA.                                                                                                       |     |    |

**If you want to participate in the PIMS Trial, please sign your name below:**

Participant Signature \_\_\_\_\_

Participant Full Name \_\_\_\_\_

Date \_\_\_\_/\_\_\_\_/\_\_\_\_

**Research staff who has explained this study to you also needs to sign this form:**

Staff Signature \_\_\_\_\_

Staff Full Name \_\_\_\_\_

Date \_\_\_\_/\_\_\_\_/\_\_\_\_



1  
2  
3  
4  
5 **Thank you for your help.**  
6

7 By completing and returning this form, you are giving us your consent that the personal  
8 information you provide will be treated as strictly confidential and handled in accordance with  
9 the provisions of the UK Data Protection Act 2018.  
10

11 *\*When completed: 1 for participant; and 1 for researcher site file.*  
12  
13  
14  
15  
16  
17  
18  
19  
20  
21  
22  
23  
24  
25  
26  
27  
28  
29  
30  
31  
32  
33  
34  
35  
36  
37  
38  
39  
40  
41  
42  
43  
44  
45  
46  
47  
48  
49  
50  
51  
52  
53  
54  
55  
56  
57  
58  
59  
60

## Appendix III – Informed Consent Form for Study Participation: Healthy Controls

### Healthy Controls Informed Consent Form for Study Participation

REC No. 22/EE/0010, Date: 17.02.2022, Version: 1

### Psychosis Immune Mechanism Stratified Medicine Trial: The PIMS Trial

**PARTICIPANT ID:** \_\_\_\_\_

Thank you for taking part in the PIMS Trial eligibility assessment. Based on this assessment, you are eligible to take part in the PIMS Trial. Before you agree to take part, the research team must explain the study to you. If you have any questions arising from the Participant Information Sheet or from the explanation already given to you, please ask a member of the research team before you decide to participate. You will be given a copy of this Informed Consent Form to keep for future reference.

**Please read the statements below and insert your initial in the box next to each statement if you agree with them:**

| Statement                                                                                                                                                                                                                                                                                                                                                                                               | Initial Here |    |
|---------------------------------------------------------------------------------------------------------------------------------------------------------------------------------------------------------------------------------------------------------------------------------------------------------------------------------------------------------------------------------------------------------|--------------|----|
| 1. I have read and understood the information sheet version XX dated DD.MM.YYYY and have had the opportunity to ask questions.                                                                                                                                                                                                                                                                          |              |    |
| 2. I agree to take part in the PIMS Trial. I understand that my participation is voluntary, and I am free to withdraw at any time without giving a reason, without my current or future medical care or legal rights being affected.                                                                                                                                                                    |              |    |
| 3. I understand that confidentiality and anonymity will be maintained, and it will not be possible to identify me in any publications.                                                                                                                                                                                                                                                                  |              |    |
| 4. I agree to partake in interviews, complete questionnaires, and cognitive tests as part of this study. I understand what will happen during the study assessments.                                                                                                                                                                                                                                    |              |    |
| 5. I agree to provide blood samples. The purposes and possible risks of donating these samples have been explained to me. I understand that donated samples will be considered a gift, but I will have the right to withdraw permission for analysis.                                                                                                                                                   |              |    |
| 6. I understand that my blood samples collected will be stored at PIMS Trial centres.                                                                                                                                                                                                                                                                                                                   |              |    |
| 7. I understand that blood samples collected from me will be used to measure non-genetic factors such as biochemical changes in the blood.                                                                                                                                                                                                                                                              |              |    |
| 8. I understand that any of my samples (labelled with an anonymous ID only), or any information obtained from them, including the sequence of my genetic material, may be sent to specialist research laboratories in the UK and abroad for analyses and the results returned to PIMS Trial centres. Researchers at these laboratories have no access to personal information about study participants. |              |    |
| 9. I agree that the samples and information I provide can be stored, used and shared between PIMS Trial sites and with collaborators/contractors for the purpose of the study.                                                                                                                                                                                                                          |              |    |
| 10. I understand that information related to my participation in this study may be accessed by responsible individuals from the sponsors of this study for quality control purposes. I give permission for these individuals to have access to this data.                                                                                                                                               |              |    |
| <i>Optional (Not agreeing to these will not exclude you from this study). Please tick Yes / No (as appropriate)</i>                                                                                                                                                                                                                                                                                     | Yes          | No |

|                                                                                                                                                                                                                                  |  |  |
|----------------------------------------------------------------------------------------------------------------------------------------------------------------------------------------------------------------------------------|--|--|
| 11. I agree to undergo brain scans as part of the PIMS Trial.                                                                                                                                                                    |  |  |
| 12. I agree to be contacted in future by researchers to participate in follow up studies to this project, or in future studies of a similar nature.                                                                              |  |  |
| 13. I understand that researchers may use the blood samples for genetic analysis.                                                                                                                                                |  |  |
| 14. I agree that the samples can be stored after completion of the PIMS Trial for use in future, ethically approved, non-genetic studies.                                                                                        |  |  |
| 15. I agree that the information I give can be stored after completion of the PIMS Trial for use in future, ethically approved, non-genetic studies.                                                                             |  |  |
| 16. I agree that data and samples can be stored after completion of the PIMS Trial for use in future, ethically approved, genetic studies. This includes the main stocks of any genetic material collected, such as DNA and RNA. |  |  |

**If you want to participate in the PIMS Trial, please sign your name below:**

Participant Signature \_\_\_\_\_

Participant Full Name \_\_\_\_\_

Date \_\_\_\_ / \_\_\_\_ / \_\_\_\_\_

**Research staff who has explained this study to you also needs to sign this form:**

Staff Signature \_\_\_\_\_

Staff Full Name \_\_\_\_\_

Date \_\_\_\_ / \_\_\_\_ / \_\_\_\_\_

**Thank you for your help.**

By completing and returning this form, you are giving us your consent that the personal information you provide will be treated as strictly confidential and handled in accordance with the provisions of the UK Data Protection Act 2018.

*\*When completed: 1 for participant; and 1 for researcher site file.*
